# Supplementary material for: Changes in the US Burden of Chronic Kidney Disease From 2002 to 2016: An Analysis of the Global Burden of Disease Study
Source: PubMed Central journal article supplement (PMC6324659; doi:10.1001/jamanetworkopen.2018.4412), 2018-11-30

## Supplementary Online Content

Bowe B, Xie Y, Li T, et al. Changes in the US burden of chronic kidney disease from 2002 to 2016: an analysis of the Global Burden of Disease study. *JAMA Netw Open*. 2018;1(7):e184412. doi:10.1001/jamanetworkopen.2018.4412

**eAppendix.** Supplemental Methods

**eReferences.**

**eTable 1.** Terms and Definitions

**eTable 2.** Number and Age-Standardized Rate for Overall DALY Due to CKD and by Cause, With Percentage Change From 2002 to 2016 for the United States and by State and District

**eTable 3.** Number and Age-Standardized Rate for Overall Deaths Due to CKD and by Cause, With Percentage Change From 2002 to 2016 for the United States and by State and District

**eTable 4.** Years Living With Disability (YLD) Due to CKD in the United States and by State and District in the Overall Population, and in Females and Males

**eTable 5.** Years of Life Lost (YLL) Due to CKD in the United States and by State and District in the Overall Population, and in Females and Males

**eTable 6.** Disability-Adjusted Life Years (DALYs) Due to CKD in the United States and by State and District in Females and Males

**eTable 7.** Death Due to CKD in the United States and by State and District in Females and Males

**eFigure 1.** Maps of the Age-Standardized Disability-Adjusted Life-Years (DALYs) Due to Chronic Kidney Disease in the United States in Females and Males

**eFigure 2.** Maps of the Age-Standardized Death Due to Chronic Kidney Disease in the United States in Females and Males

**eFigure 3.** Decomposition of the Percentage Change in Chronic Kidney Disease Burden in the United States From 2002 to 2016 Due to Changes in Age Structure, Size of the Population, and Risk Exposure

**eFigure 4.** Decomposition of the Percentage Change in Age-Standardized Death Rates Due to Chronic Kidney Disease in the United States From 2002 to 2016 by Risk Factor

**eFigure 5.** Decomposition of the Percentage Change in Age-Standardized CKD Burden Rate in the United States from 2002 to 2016 by Cause

**eFigure 6.** Age-Standardized Disability-Adjusted Life-Year (DALY) Rates Due to Chronic Kidney Disease in 2002 vs 2016 by Sociodemographic Index (SDI)

**eFigure 7.** Observed to Expected Ratio of Age-Standardized Disability-Adjusted Life-Year (DALY) Rate Due to CKD in 2016 Based on a State or District's Sociodemographic Index (SDI)

**eFigure 8.** Frontier Analysis for Age-Standardized Disability-Adjusted Life-Year (DALY) Rates Due to CKD by Sociodemographic Index (SDI) in 2016

This supplementary material has been provided by the authors to give readers additional information about their work.

## **eAppendix.** Supplemental Methods

### **GBD estimates of CKD burden:**

GBD estimates of burden are updated each iteration based on updated data sources and methodologies. United States data sources used in fatal and nonfatal estimation of CKD are available from the GBD Input Sources Tool<sup>1</sup>. CKD was defined as eGFR <60 ml/min/1.73m<sup>2</sup>. Sources used to estimate CKD burden were identified through a PubMed search selecting titles and abstracts containing “chronic kidney disease” and “prevalen\*” with a date since Jan 1, 2015 that did not have a subject heading that denoted an only animal studies. Identified sources were combined with those identified from searchers in prior years, such that the total literature body covered from 1980 to 2016. Sources were supplemented with population-based surveys that measured renal function. A list of sources is included below for fatal and non-fatal estimates.

Search string (run on PubMed):

```
((((("chronic kidney disease"[Title/Abstract]) AND prevalen*[Title/Abstract]) AND ("2015/1/1"[Date - Publication] : "3000"[Date - Publication])) NOT ((animals[MeSH] NOT humans[MeSH])))
```

For cause of death estimates, data from the United States Renal Data System Annual Data Report and United States National Vital Statistics System Custom Mortality Data and United States Military Deaths were used. The underlying cause of death data were mapped based on GBD cause of death ICD mapping methods; garbage codes, which are causes of death which should not be an underlying cause of death, were redistributed to other codes based on methods including regression models and fractional reassignment of a death assigned multiple causes. Cause of death from CKD was attributed using the following ICD-10 and ICD-9 codes:

| ICD revision | Codes                                                                                       |
|--------------|---------------------------------------------------------------------------------------------|
| ICD-10       | D63.1, E10.2, E11.2, E12.2, E13.2, E14.2, I12-I13.9, N02-N08.8, N15.0, N18-N18.9, Q61-Q62.8 |
| ICD-9        | 250.4, 403-404.9, 581-583.9, 585-585.9, 589-589.9, 753-753.3                                |

Data were then used in cause of death ensemble method (CODEm) models to estimate death rate due to CKD. The CODEm model is an ensemble model which takes into account multiple covariate combinations and model types to enhance the accuracy of prediction. Cause of Death Correct (CoDCorrect) is then applied, along with estimates of other causes of death, to reconcile differences between the causes of death and overall mortality. Sub-causes of death due to CKD were informed by end-stage renal disease registries. Data from the Australia & New Zealand Dialysis and Transplant Registry, that contains age and subcause-specific data, were used in DisMod-MR 2.1 models (an integrative metaregression approach) that adjusted for diabetes prevalence and mean systolic blood pressure to obtain estimates of proportions for each subtype by location, year, age, and sex. The estimated proportions are adjusted so that they sum to 1, and then applied to the parent CKD CODEm model to estimate the death rate for each sub cause of death.

For nonfatal estimates in GBD 2016 a total of 23 distinct data sources including United States National Health and Nutrition Examination Survey, United States Renal Data System Annual Data Report and many other national or subnational studies were identified (a complete list provided below). DisMod-MR 2.1, a metaregression method that evaluates all available information including hospital inpatient and outpatient data, claims data, and other population study datasets on diseases that passes a minimum quality standard were used to estimate the prevalence and incidence by cause and sequelae<sup>2,3</sup>. Disability weights were then applied to calculate the YLDs<sup>4</sup>.

Risk factors for CKD were defined based on the comparative risk assessment conceptual framework, where risks of CKD were hierarchically organized, and quantification of their contribution could be conducted at any level of the framework. The risk-outcome pairs were included based on evidence rules and had to have met World Cancer Research Fund (WCRF) criteria for convincing or probable evidence. The overall modeling strategy, and risk-outcome pairs are then reviewed by an independent advisory council (IAC). The exposure levels of risk factors were estimated, standardized and used in DisMod-MR 2.1 meta regression to estimate the burden of CKD due to each risk factors.

All GBD data are publicly available from the Global Health Data Exchange ([http://ghdx.healthdata.org/ihme\\_data](http://ghdx.healthdata.org/ihme_data)),

**Data sources for cause of death:**

|                                                                                                                                                                                                                                                                                                              |
|--------------------------------------------------------------------------------------------------------------------------------------------------------------------------------------------------------------------------------------------------------------------------------------------------------------|
| United States Renal Data System Coordinating Center. USRDS 2010 Annual Data Report: Atlas of Chronic Kidney Disease and End-Stage Renal Disease in the United States. Bethesda, United States: National Institute of Diabetes and Digestive and Kidney Diseases (NIDDK), National Institutes of Health, 2010 |
| United States Renal Data System Coordinating Center. USRDS 2005 Annual Data Report: Atlas of End-Stage Renal Disease in the United States. Bethesda, United States: National Institute of Diabetes and Digestive and Kidney Diseases (NIDDK), National Institutes of Health, 2005                            |
| United States Renal Data System Coordinating Center. USRDS 2013 Annual Data Report: Atlas of Chronic Kidney Disease and End-Stage Renal Disease in the United States. Bethesda, United States: National Institute of Diabetes and Digestive and Kidney Diseases (NIDDK), National Institutes of Health, 2013 |
| United States Renal Data System Coordinating Center. USRDS 2000 Annual Data Report: Atlas of End-Stage Renal Disease in the United States. Bethesda, United States: National Institute of Diabetes and Digestive and Kidney Diseases (NIDDK), National Institutes of Health, 2000                            |
| U.S. Renal Data System. USRDS 1996 Annual Data Report. Bethesda (MD), United States: National Institute of Diabetes and Digestive and Kidney Diseases (NIDDK), National Institutes of Health, 1996                                                                                                           |
| U.S. Renal Data System. USRDS 1994 Annual Data Report. Bethesda (MD), United States: National Institute of Diabetes and Digestive and Kidney Diseases (NIDDK), National Institutes of Health, 1994                                                                                                           |
| National Center for Health Statistics, Centers for Disease Control and Prevention. United States NVSS Mortality Data 1994 - NBER. Hyattsville, United States: National Center for Health Statistics, Centers for Disease Control and Prevention                                                              |









|                                                                                                                                                                                                                       |
|-----------------------------------------------------------------------------------------------------------------------------------------------------------------------------------------------------------------------|
| National Center for Health Statistics (NCHS), Centers for Disease Control and Prevention (CDC), U.S. Department of Defense. United States NVSS Custom Mortality Data 2010 and United States Military Deaths 1980-2014 |
| National Center for Health Statistics (NCHS), Centers for Disease Control and Prevention (CDC), U.S. Department of Defense. United States NVSS Custom Mortality Data 2011 and United States Military Deaths 1980-2014 |
| National Center for Health Statistics (NCHS), Centers for Disease Control and Prevention (CDC), U.S. Department of Defense. United States NVSS Custom Mortality Data 2012 and United States Military Deaths 1980-2014 |
| National Center for Health Statistics (NCHS), Centers for Disease Control and Prevention (CDC), U.S. Department of Defense. United States NVSS Custom Mortality Data 2013 and United States Military Deaths 1980-2014 |
| National Center for Health Statistics (NCHS), Centers for Disease Control and Prevention (CDC), U.S. Department of Defense. United States NVSS Custom Mortality Data 2014 and United States Military Deaths 1980-2014 |

#### **Data sources for non-fatal estimates**

|                                                                                                                                                                                                                                                                                                            |
|------------------------------------------------------------------------------------------------------------------------------------------------------------------------------------------------------------------------------------------------------------------------------------------------------------|
| National Center for Health Statistics (NCHS), Centers for Disease Control and Prevention (CDC). United States National Health and Nutrition Examination Survey 2007-2008. Hyattsville, United States: National Center for Health Statistics (NCHS), Centers for Disease Control and Prevention (CDC), 2009 |
| National Center for Health Statistics (NCHS), Centers for Disease Control and Prevention (CDC). United States National Health and Nutrition Examination Survey 2005-2006. Hyattsville, United States: National Center for Health Statistics (NCHS), Centers for Disease Control and Prevention (CDC), 2007 |
| National Center for Health Statistics (NCHS), Centers for Disease Control and Prevention (CDC). United States National Health and Nutrition Examination Survey 2003-2004. Hyattsville, United States: National Center for Health Statistics (NCHS), Centers for Disease Control and Prevention (CDC)       |
| National Center for Health Statistics (NCHS), Centers for Disease Control and Prevention (CDC). United States National Health and Nutrition Examination Survey 2009-2010. Hyattsville, United States: National Center for Health Statistics (NCHS), Centers for Disease Control and Prevention (CDC), 2011 |
| National Center for Health Statistics (NCHS), Centers for Disease Control and Prevention (CDC). United States National Health and Nutrition Examination Survey 1988-1994. Hyattsville, United States: National Center for Health Statistics (NCHS), Centers for Disease Control and Prevention (CDC)       |
| National Center for Health Statistics (NCHS), Centers for Disease Control and Prevention (CDC). United States National Health and Nutrition Examination Survey 2001-2002. Hyattsville, United States: National Center for Health Statistics (NCHS), Centers for Disease Control and Prevention (CDC)       |
| National Center for Health Statistics (NCHS), Centers for Disease Control and Prevention (CDC). United States National Health and Nutrition Examination Survey 1999-2000. Hyattsville, United States: National Center for Health Statistics (NCHS), Centers for Disease Control and Prevention (CDC)       |
| National Center for Health Statistics (NCHS) Centers for Disease Control and Prevention (CDC). United States National Health and Nutrition Examination Survey 2011-2012. Hyattsville, United States: National Center for Health Statistics (NCHS) Centers for Disease Control and Prevention (CDC), 2013   |

|                                                                                                                                                                                                                                                                                                              |
|--------------------------------------------------------------------------------------------------------------------------------------------------------------------------------------------------------------------------------------------------------------------------------------------------------------|
| United States Renal Data System Coordinating Center. USRDS 2010 Annual Data Report: Atlas of Chronic Kidney Disease and End-Stage Renal Disease in the United States. Bethesda, United States: National Institute of Diabetes and Digestive and Kidney Diseases (NIDDK), National Institutes of Health, 2010 |
| United States Renal Data System Coordinating Center. USRDS 2005 Annual Data Report: Atlas of End-Stage Renal Disease in the United States. Bethesda, United States: National Institute of Diabetes and Digestive and Kidney Diseases (NIDDK), National Institutes of Health, 2005                            |
| United States Renal Data System Coordinating Center. USRDS 2013 Annual Data Report: Atlas of Chronic Kidney Disease and End-Stage Renal Disease in the United States. Bethesda, United States: National Institute of Diabetes and Digestive and Kidney Diseases (NIDDK), National Institutes of Health, 2013 |
| United States Renal Data System Coordinating Center. USRDS 2000 Annual Data Report: Atlas of End-Stage Renal Disease in the United States. Bethesda, United States: National Institute of Diabetes and Digestive and Kidney Diseases (NIDDK), National Institutes of Health, 2000                            |
| U.S. Renal Data System. USRDS 1996 Annual Data Report. Bethesda (MD), United States: National Institute of Diabetes and Digestive and Kidney Diseases (NIDDK), National Institutes of Health, 1996                                                                                                           |
| U.S. Renal Data System. USRDS 1994 Annual Data Report. Bethesda (MD), United States: National Institute of Diabetes and Digestive and Kidney Diseases (NIDDK), National Institutes of Health, 1994                                                                                                           |
| National Center for Health Statistics (NCHS), Centers for Disease Control and Prevention (CDC). United States National Health and Nutrition Examination Survey 2013-2014. Hyattsville, United States: National Center for Health Statistics (NCHS), Centers for Disease Control and Prevention (CDC)         |
| United States Renal Data System. 2015 USRDS Annual Data Report: Epidemiology of Kidney Disease in the United States. National Institutes of Health, National Institute of Diabetes and Digestive and Kidney Diseases, Bethesda, MD, 2015                                                                     |
| Arora P, Elkin PL, Eberle J, Bono JJ, Argauer L, Murray BM, Ram R, Venuto RC. An observational study of the quality of care for chronic kidney disease: a Buffalo and Albany, New York metropolitan area study. <i>BMC Nephrol.</i> 2015; 16: 199                                                            |
| Coresh J, Astor BC, Matsushita K, Grams M, Sang Y, Chronic Kidney Disease Prognosis Consortium (CKD-PC). United States Atherosclerosis Risk in Communities (ARIC) Study Chronic Kidney Disease Prevalence Data 1996-1998 [Unpublished]                                                                       |
| Fox C, Hwang SJ, Meigs J, Upadhyay A, Chronic Kidney Disease Prognosis Consortium (CKD-PC). United States Framingham Heart Study Chronic Kidney Disease Prevalence Data 1995-1998 [Unpublished]                                                                                                              |
| Jassal SK, Bergstrom J, Ix JH, Barrett-Connor E, Chronic Kidney Disease Prognosis Consortium (CKD-PC). United States - Rancho Bernardo Study Chronic Kidney Diseases Prevalence Data 1972-1974 [Unpublished]                                                                                                 |
| Shlipak M, Sarnak MJ, Katz R, Fried LF, Chronic Kidney Disease Prognosis Consortium (CKD-PC). United States Cardiovascular Health Study (CHS) Chronic Kidney Disease Prevalence Data 2004 [Unpublished]                                                                                                      |
| Shlipak M, Sarnak M, Katz R, Peralta C, Chronic Kidney Disease Prognosis Consortium (CKD-PC). United States Multi-Ethnic Study of Atherosclerosis (MESA) Chronic Kidney Disease Prevalence Data 2000 [Unpublished]                                                                                           |
| Organ Procurement and Transplantation Network (OPTN) (United States), U.S. Department of Health and Human Services, United Network for Organ Sharing (United States). United States Organ Procurement and Transplantation Network Data Report Advanced Build -                                               |

### Decomposition analysis:

The decomposition methodology of Das Gupta<sup>5-7</sup> was used to better understand the drivers of change from 2002 to 2016 in DALY and Death numbers. We decomposed the change of DALY and Death numbers by population size, age structure and risk exposure. The DALY or death numbers were considered to follow the formula:

$$DV_{ay, py, ey} = \sum_{i=1}^{21} (a_{i,y} * p_y * e_{i,y})$$

Where DV<sub>ay, py, ey</sub> represents the dependent variable (DALY or Death numbers) based on the factors of population size, age structure and risk exposure in year y.  $a_{i,y}$  represents the proportion of population for the age category i (amongst the 21 age categories) in year y, where ages under 1, above 95, and every 5 years in between were considered a category.  $p_y$  represents the total population in given year y; and  $e_{i,y}$  represents DALY rate or Death rate given age category i in year y. Years y were 2002 or 2016. The 3 factor decomposition analyses as described by Das Gupta<sup>5-7</sup>, with number as a function of factors were then applied.

The age standardized DALY rates and Death rates were decomposed based on CKD risk factors as defined in the GBD comparative risk assessment framework which includes metabolic (high fasting plasma glucose, high systolic blood pressure, high body mass index), dietary (diet high in sodium, and diet high in sugar sweetened beverages), and environmental risk factors (lead exposure). GBD data for risk factors is not available every year; here we chose data from 2000 (the year prior and most proximal to 2002 with risk data), and applied the distribution of age-standardized risk factor attributable CKD DALY and death rates to corresponding 2002 rates. The GBD considers these risk factors to contribute to 100% of the estimated CKD DALY and Death rates. However, population attributable fractions often overlap and the sum of all risk

factors can overestimate DALY and Death rates. In order to keep the decomposition consistent with overall DALY rates and Death rates, risk factors were scaled by a factor of  $1/\text{sum}(\text{risk factors})$  so that they summed to be 100% of the estimated values while. This assumes that their proportional contribution to the DALY rate and death rate before and after scaling is fixed. Age-standardized rates were computed based on  $\text{Rate} = \sum_{q=1}^6 Rq y$ . Where  $q$  represents one of the six risk factor and  $y$  represent the year and  $Rqy$  represent the age standardized rate for specific risk factor in given year  $y$ . Hence the change of rate  $= \sum_{q=1}^6 (Rq 2016 - Rq 2002)$ .

We additionally decomposed the age standardized DALY and Death rates due to CKD based on CKD caused by diabetes, hypertension, glomerulonephritis and other causes. Similar to the decomposition by risk,  $\text{Rate} = \sum_{q=1}^4 Cq y$  and change of rate  $= \sum_{q=1}^4 (Cq 2016 - Cq 2002)$  where  $Cqy$  represent the age standardized rate for specific cause  $q$  in given year  $y$ .

The results of decomposition analyses interpreted as the effect of the change in one factor on DALY or Death numbers (or rates where applicable) while the other factors are held constant. All decomposition results are reported as percentage change from the relevant total value in 2002.

### **Probability of Death**

Utilizing GBD data on overall death rates and rates of death due to CKD by cause, an abridged multiple decrement period life table was constructed<sup>8,9</sup>. The Chiang formula was then used for estimation of within interval probability of death, where deaths were assumed to occur in a uniform distribution throughout each age group<sup>10</sup>. For a given cause, the probability of death due to a specific cause for a given age group is:

$${}_nq_x = \frac{{}_nm_x}{1 + n * (1 - {}_na_x) * {}_nm_x}$$

Where q is the probability of dying, m the death rate cause, x the age at the start of the interval, n the width of the interval, and a proportion the proportion of the interval lived by those who die in the interval (for uniform distribution a is 0.5). Cumulative probability of death is then calculated using standard life table methods while accounting for competing risks of death. The decomposition method of Das Gupta was then applied to decompose the overall change in probability of CKD death due to diabetes mellitus, hypertension, glomerulonephritis, other causes, and as a result of change in probability of death from other competing, non-CKD, causes, which we refer as epidemiologic changes<sup>5-7</sup>. The rate of epidemiologic change was calculated by subtracting CKD rates from overall rates.

### **Observed vs. Expected analysis**

Generalized estimation equation (GEE) models with an autoregressive covariance structure using data from 2002 to 2016 were built to establish relation between SDI and a state's age-standardized DALY rate and death rates due to CKD, with predictors of SDI, year, and an interaction between SDI and year. The year term provides an overall trend for the outcome as time has changed, and the interaction allows for the relation between SDI and outcome to vary in different years. Restricted cubic splines to allow for non-linear trends did not improve model fit, as assessed by BIC, so were not included. A GEE modeling approach was taken to estimate the marginal expected value of age-standardized DALY or death rate due to CKD given a states SDI and the year, while accounting for the correlation that results from repeated measurements in the same state over time. The ratios between estimated value and observed value at 2016 from the GBD study were then computed for each state and distract to indicate the difference between observed and expected value based on SDI and year.

## Frontier Analysis

A frontier analysis was conducted using SDI and age-standardized DALY rate due to CKD in 2016 for all states and district. A data envelope analysis utilizing the free disposal hull method was developed, which was chosen over the standard stochastic frontier as it allows for a non-linear frontier<sup>11-13</sup>. One thousand bootstrapped samples of the data were used to account for uncertainty in DALY estimates; to exclude influence of outliers, super-efficient countries were excluded in each bootstrapped sample<sup>11</sup>. The mean frontier at each SDI value from the bootstrapped samples was computed and placed in a LOESS regression to develop a smoothed frontier<sup>11</sup>. To understand the relationship of age-standardized CKD DALY rates vis-à-vis the frontier, we calculated the effective difference (the absolute distance from the frontier). States or district that achieved DALY rates lower than the frontiers were assigned a zero distance.

The DALY frontier pinpoints the minimum age-standardized DALY rate that could be attained for every state or district given its SDI. Distance from the frontier is termed effective difference; a large effective difference from the frontier suggests there may be unrealized opportunities for gains or improvement (reduction in CKD DALYs) that should be possible based on the state or district's place on the development spectrum.

All GBD data and codes are publicly available from the Global health data exchange (<http://ghdx.healthdata.org/gbd-2016-code>). Analytic code for this study may be obtained by request.

## eReferences:

1. Global Burden of Disease Study 2016 (GBD 2016) Data Input Sources Tool. Institute for Health Metrics and Evaluation; 2016. [ghdx.healthdata.org/gbd-2016/data-input-sources](http://ghdx.healthdata.org/gbd-2016/data-input-sources). Accessed 6/13/2018.
2. Collaborators USBoD, Mokdad AH, Ballestros K, et al. The State of US Health, 1990-2016: Burden of Diseases, Injuries, and Risk Factors Among US States. *Jama*. Apr 10 2018;319(14):1444-1472.
3. Abraham D, Flaxman TV, Christopher J.L. Murray. *An Integrative MetaRegression Framework for Descriptive Epidemiology*. First Edition ed: University of Washington Press; 2015.
4. Disease GBD, Injury I, Prevalence C. Global, regional, and national incidence, prevalence, and years lived with disability for 328 diseases and injuries for 195 countries, 1990-2016: a systematic analysis for the Global Burden of Disease Study 2016. *Lancet*. Sep 16 2017;390(10100):1211-1259.
5. P. DG. *Standardization and decomposition of rates: a user's manual, Pages 19-36*. 1993.
6. Das Gupta P. Standardization and decomposition of rates from cross-classified data. *Genus*. Jul-Dec 1994;50(3-4):171-196.
7. Chevan A, Sutherland M. Revisiting Das Gupta: refinement and extension of standardization and decomposition. *Demography*. Aug 2009;46(3):429-449.
8. Carey JR. The multiple decrement life table: a unifying framework for cause-of-death analysis in ecology. *Oecologia*. 1989;78(1):131-137.
9. Chiang CL, Organization WH. Life table and mortality analysis. 1979.
10. Chiang CL. The life table and its applications. 1984.
11. Access GBDH, Quality Collaborators. Electronic address cue, Access GBDH, Quality C. Healthcare Access and Quality Index based on mortality from causes amenable to personal health care in 195 countries and territories, 1990-2015: a novel analysis from the Global Burden of Disease Study 2015. *Lancet*. May 18 2017.
12. Bogetoft PaO, L. *Benchmarking with data envelopment analysis, stochastic frontier analysis, and R*. . 2011 edition. ed2013.
13. Xie Y, Bowe B, Xian H, Balasubramanian S, Al-Aly Z. Rate of Kidney Function Decline and Risk of Hospitalizations in Stage 3A CKD. *Clinical journal of the American Society of Nephrology : CJASN*. Nov 6 2015;10(11):1946-1955.

## eTables

**eTable 1: Terms and definitions**

**Age standardized rate:** Rate per 100,000 population following standardization to the global age structure. The difference between age-standardized rates across US geographies and over time is independent of population size and age structure.

**Decomposition:** The analytic approach to identify the additive contribution of the effect of the differences in factors in two populations to the difference in their overall value. For example, decomposition of CKD DALYs by age structure, population growth, and risk exposure changes allows the quantification of contribution of each of these factors to the overall effect. Similarly, decomposition of CKD DALYs by the four causes of CKD allows the quantification of the contribution of each cause to the overall CKD DALYs.

**Disability-adjusted life years (DALYs):** A measure which quantitates the overall burden of disease in terms of years of healthy life lost due to the disease. It represents the sum of years lost due to premature death (YLL) and years living with disability due to the disease (YLD). The years of living with disability are weighted in proportion to the duration and severity of the underlying disease.

**Frontier analysis:** The analytic approach used to identify the lowest potentially achievable burden of CKD on the basis of development status, as measured by the Socio-demographic index (SDI). The frontier delineates the countries or territories with leading performance (at the frontier pushing the envelope) which have the lowest CKD burden for their SDI. Distance from the frontier is termed effective difference and represents the gap between the observed burden and the potentially achievable burden of disease in a country or territory given their SDI; this gap could be potentially reduced or eliminated based on the country or territory's socio-demographic resources. For example, if a country or territory falls well below the frontier value given its SDI, this observation suggests unrealized opportunity for reduction (or improvement) in CKD DALYs that should be possible based on the country or territory's place on the development spectrum.

**Garbage codes:** refer to causes of death recorded on death certificates which cannot or should not be considered the actual underlying causes of death. For example, risk factors such as hypertension, or obesity, non-fatal health conditions such as osteoporosis, or limb fractures, and causes that represent the final stage of a disease such as cardiac arrest when ischemic heart disease is the true underlying health condition for cause of death.

**Global Burden of Diseases, Injuries, and Risk Factors Study (GBD):** A global research study group headquartered at the Institute of Health Metrics and Evaluation at the University of Washington in Seattle; it is comprised of more than 3,000 international collaborators from more than 130 countries and aims to quantitate the burden of disease, disability, and death from 333 diseases and injuries, and 88 risk factors in 195 countries and territories, by age and sex, from 1990 to the present, allowing comparisons over time, across age groups, and among populations. The GBD study is funded by the Bill and Melinda Gates Foundation.

**Level of Cause:** The GBD provides data for causes and disability aggregated to different levels, with the lowest level being the most aggregate, and higher levels being more specific. Level 1 consists of 3 broad categories: a) communicable, maternal, neonatal, and nutritional diseases, b) non-communicable diseases, and c) injuries. Level 2 causes are subdivided from Level 1 causes into 21 categories.

**Socio-demographic Index (SDI):** A summary measure which quantitates a state, country, or territory's level of a socio-demographic development; it interpretable across geographies and over time. SDI is



expressed on a scale of 0 to 1 and is the composite average of the rankings of the incomes per capita, average educational attainment, and total fertility rates of all areas in the GBD study. Zero represents the lowest income per capita, lowest educational attainment, and highest total fertility rate observed across all GBD geographies from 1970 to 2016, and one represents the highest income per capita, highest educational attainment, and lowest total fertility rate.

**eTable 2:** Number and age-standardized rate for overall DALY due to CKD and by cause, with percentage change from 2002 to 2016 for the United States and by state and district.

| Location      | DALY number                   |                          | DALY per 100,000 persons |                          | Age-standardized DALY per 100,000 persons |                          |                   |                                |                     |                                |                           |                                |                     |                                |
|---------------|-------------------------------|--------------------------|--------------------------|--------------------------|-------------------------------------------|--------------------------|-------------------|--------------------------------|---------------------|--------------------------------|---------------------------|--------------------------------|---------------------|--------------------------------|
|               |                               |                          |                          |                          | All causes                                |                          | Due to diabetes   |                                | Due to hypertension |                                | Due to glomerulonephritis |                                | Due to other causes |                                |
|               | 2016 (UI)                     | Percent change from 2002 | 2016 (UI)                | Percent change from 2002 | 2016 (UI)                                 | Percent change from 2002 | 2016 (UI)         | Percent change from 2002 (PA*) | 2016 (UI)           | Percent change from 2002 (PA*) | 2016 (UI)                 | Percent change from 2002 (PA*) | 2016 (UI)           | Percent change from 2002 (PA*) |
| United States | 1935954<br>(1747356, 2124795) | 52.6                     | 600<br>(541, 658)        | 35.9                     | 440<br>(395, 485)                         | 18.6                     | 245<br>(216, 274) | 21.8<br>(63.1)                 | 83<br>(69, 97)      | 22<br>(21.6)                   | 45 (36, 54)               | 10.4 (6.1)                     | 68<br>(56, 81)      | 10.3 (9.2)                     |
| Alabama       | 40483<br>(35921, 45183)       | 46.2                     | 833<br>(739, 929)        | 34.8                     | 604<br>(534, 673)                         | 19.4                     | 337<br>(295, 381) | 23.5<br>(65.3)                 | 109<br>(90, 129)    | 18.7<br>(17.4)                 | 64 (51, 77)               | 12.7 (7.3)                     | 95<br>(78, 114)     | 11.6<br>(10.1)                 |
| Alaska        | 2790<br>(2404, 3158)          | 75.3                     | 380<br>(327, 430)        | 54.1                     | 359<br>(311, 407)                         | 22.7                     | 196<br>(168, 224) | 26 (61)                        | 68<br>(56, 82)      | 27.6<br>(22.1)                 | 38 (30, 46)               | 13.4 (6.8)                     | 57<br>(46, 69)      | 13.4<br>(10.1)                 |
| Arizona       | 37342<br>(32595, 41893)       | 77.2                     | 540<br>(472, 606)        | 38.4                     | 389<br>(338, 437)                         | 17.6                     | 216<br>(187, 248) | 21.4<br>(65.5)                 | 71<br>(58, 84)      | 18.6<br>(19.1)                 | 41 (32, 49)               | 9.6 (6.1)                      | 61<br>(49, 73)      | 9.8 (9.2)                      |
| Arkansas      | 22726<br>(20552, 25070)       | 54.3                     | 764<br>(691, 843)        | 40.3                     | 553<br>(498, 611)                         | 27.8                     | 308<br>(273, 346) | 32.4<br>(62.7)                 | 101<br>(84, 119)    | 30.9<br>(19.7)                 | 58 (47, 69)               | 17.1 (7)                       | 86<br>(71, 103)     | 17.4<br>(10.6)                 |
| California    | 189027<br>(165952, 212569)    | 62.6                     | 479<br>(421, 539)        | 44                       | 376<br>(329, 424)                         | 21.1                     | 210<br>(182, 241) | 24.3<br>(62.4)                 | 71<br>(58, 84)      | 28.4<br>(23.9)                 | 38 (31, 47)               | 9.7 (5.2)                      | 58<br>(47, 70)      | 10.8 (8.6)                     |

| Location             | DALY number                |                          | DALY per 100,000 persons |                          | Age-standardized DALY per 100,000 persons |                          |                   |                                |                     |                                |                           |                                |                     |                                |
|----------------------|----------------------------|--------------------------|--------------------------|--------------------------|-------------------------------------------|--------------------------|-------------------|--------------------------------|---------------------|--------------------------------|---------------------------|--------------------------------|---------------------|--------------------------------|
|                      |                            |                          |                          |                          | All causes                                |                          | Due to diabetes   |                                | Due to hypertension |                                | Due to glomerulonephritis |                                | Due to other causes |                                |
|                      | 2016 (UI)                  | Percent change from 2002 | 2016 (UI)                | Percent change from 2002 | 2016 (UI)                                 | Percent change from 2002 | 2016 (UI)         | Percent change from 2002 (PA*) | 2016 (UI)           | Percent change from 2002 (PA*) | 2016 (UI)                 | Percent change from 2002 (PA*) | 2016 (UI)           | Percent change from 2002 (PA*) |
| Colorado             | 22956<br>(20031, 25747)    | 68.4                     | 417<br>(364, 468)        | 37.2                     | 330<br>(287, 373)                         | 13.6                     | 181<br>(154, 208) | 16.5<br>(64.8)                 | 64<br>(53, 76)      | 15.1<br>(21.1)                 | 34 (27, 42)               | 7.5 (6)                        | 51<br>(42, 62)      | 6.6 (8)                        |
| Connecticut          | 18643<br>(16407, 21018)    | 29.4                     | 521<br>(459, 588)        | 24.6                     | 356<br>(312, 404)                         | 11.3                     | 196<br>(168, 226) | 13.2<br>(63)                   | 68<br>(56, 81)      | 15<br>(24.6)                   | 37 (29, 45)               | 5.2 (5)                        | 55<br>(45, 67)      | 5.1 (7.4)                      |
| Delaware             | 6291<br>(5599, 6998)       | 65.9                     | 660<br>(588, 734)        | 40.3                     | 454<br>(403, 508)                         | 17.8                     | 252<br>(218, 285) | 21.1<br>(63.9)                 | 83<br>(68, 99)      | 19.7<br>(20)                   | 48 (39, 58)               | 11.5 (7.2)                     | 71<br>(59, 86)      | 9.4 (8.9)                      |
| District of Columbia | 3911<br>(3436, 4348)       | 6                        | 571<br>(502, 635)        | -10.2                    | 510<br>(449, 568)                         | -8                       | 291<br>(254, 329) | -4.8<br>(33.1)                 | 90<br>(74, 108)     | -0.5 (1)                       | 51 (41, 61)               | -19.9<br>(28.7)                | 78<br>(63, 94)      | -17.5<br>(37.2)                |
| Florida              | 130246<br>(115380, 146384) | 66.9                     | 637<br>(564, 716)        | 36.2                     | 402<br>(354, 455)                         | 22.9                     | 225<br>(196, 256) | 27.2<br>(64.1)                 | 73<br>(60, 85)      | 25.4<br>(19.6)                 | 42 (33, 51)               | 13.1 (6.5)                     | 63<br>(51, 76)      | 13.3 (9.8)                     |
| Georgia              | 71082<br>(63183, 79124)    | 64.3                     | 691<br>(615, 770)        | 36.1                     | 560<br>(497, 625)                         | 12.7                     | 312<br>(273, 354) | 15.2<br>(65.4)                 | 105<br>(87, 127)    | 16.2<br>(23.3)                 | 57 (46, 68)               | 5.5 (4.7)                      | 86<br>(71, 104)     | 5.1 (6.6)                      |
| Hawaii               | 7951<br>(6985, 8943)       | 64                       | 552<br>(485, 621)        | 41.9                     | 384<br>(335, 433)                         | 22.7                     | 215<br>(185, 246) | 26.3<br>(62.9)                 | 70<br>(58, 83)      | 25.2<br>(20)                   | 39 (31, 48)               | 13.9 (6.8)                     | 60<br>(48, 72)      | 14 (10.3)                      |

| Location  | DALY number             |                          | DALY per 100,000 persons |                          | Age-standardized DALY per 100,000 persons |                          |                   |                                |                     |                                |                           |                                |                     |                                |
|-----------|-------------------------|--------------------------|--------------------------|--------------------------|-------------------------------------------|--------------------------|-------------------|--------------------------------|---------------------|--------------------------------|---------------------------|--------------------------------|---------------------|--------------------------------|
|           |                         |                          |                          |                          | All causes                                |                          | Due to diabetes   |                                | Due to hypertension |                                | Due to glomerulonephritis |                                | Due to other causes |                                |
|           | 2016 (UI)               | Percent change from 2002 | 2016 (UI)                | Percent change from 2002 | 2016 (UI)                                 | Percent change from 2002 | 2016 (UI)         | Percent change from 2002 (PA*) | 2016 (UI)           | Percent change from 2002 (PA*) | 2016 (UI)                 | Percent change from 2002 (PA*) | 2016 (UI)           | Percent change from 2002 (PA*) |
| Idaho     | 8085<br>(7076, 9126)    | 87.4                     | 482<br>(422, 544)        | 49.6                     | 367<br>(320, 415)                         | 28.2                     | 201<br>(172, 232) | 31.4<br>(59.4)                 | 71<br>(58, 84)      | 32.5<br>(21.6)                 | 38 (31, 47)               | 19.5 (7.7)                     | 57<br>(46, 70)      | 18.9<br>(11.3)                 |
| Illinois  | 79218<br>(71390, 87002) | 31.3                     | 617<br>(556, 677)        | 28.2                     | 456<br>(411, 504)                         | 10.4                     | 253<br>(223, 285) | 12.8<br>(66.3)                 | 88<br>(73, 103)     | 16<br>(28.1)                   | 46 (37, 55)               | 2 (2)                          | 70<br>(57, 84)      | 2.3 (3.6)                      |
| Indiana   | 46127<br>(41109, 51279) | 50.9                     | 696<br>(620, 773)        | 40.1                     | 515<br>(457, 574)                         | 23.7                     | 283<br>(245, 323) | 26.8<br>(60.7)                 | 99<br>(82, 118)     | 26<br>(20.7)                   | 53 (43, 63)               | 16.8 (7.7)                     | 80<br>(66, 96)      | 15.6<br>(10.9)                 |
| Iowa      | 15897<br>(13923, 17920) | 49.4                     | 507<br>(444, 572)        | 39.7                     | 349<br>(304, 396)                         | 30.1                     | 192<br>(165, 220) | 33.3<br>(59.3)                 | 68<br>(56, 81)      | 35.6<br>(22)                   | 36 (29, 44)               | 20.3 (7.5)                     | 54<br>(43, 66)      | 20.2<br>(11.2)                 |
| Kansas    | 17463<br>(15499, 19555) | 42.5                     | 601<br>(533, 672)        | 32.9                     | 443<br>(391, 498)                         | 22.2                     | 245<br>(211, 279) | 26.1<br>(62.8)                 | 85<br>(70, 100)     | 23.3<br>(19.9)                 | 45 (37, 55)               | 14.3 (7)                       | 69<br>(56, 83)      | 13.9<br>(10.4)                 |
| Kentucky  | 33485<br>(29993, 36835) | 56.5                     | 757<br>(678, 832)        | 44.6                     | 550<br>(491, 605)                         | 26.3                     | 305<br>(267, 343) | 30.4<br>(62)                   | 104<br>(87, 122)    | 27.2<br>(19.4)                 | 56 (45, 67)               | 18 (7.5)                       | 85<br>(70, 101)     | 17.7<br>(11.2)                 |
| Louisiana | 41215<br>(37500, 45293) | 39.7                     | 881<br>(801, 968)        | 34.3                     | 681<br>(619, 749)                         | 16.9                     | 381<br>(339, 424) | 20<br>(64.4)                   | 124<br>(105, 145)   | 20.6<br>(21.6)                 | 70 (57, 84)               | 8.7 (5.7)                      | 106<br>(88, 126)    | 8.4 (8.4)                      |

| Location      | DALY number             |                          | DALY per 100,000 persons |                          | Age-standardized DALY per 100,000 persons |                          |                   |                                |                     |                                |                           |                                |                     |                                |
|---------------|-------------------------|--------------------------|--------------------------|--------------------------|-------------------------------------------|--------------------------|-------------------|--------------------------------|---------------------|--------------------------------|---------------------------|--------------------------------|---------------------|--------------------------------|
|               |                         |                          |                          |                          | All causes                                |                          | Due to diabetes   |                                | Due to hypertension |                                | Due to glomerulonephritis |                                | Due to other causes |                                |
|               | 2016 (UI)               | Percent change from 2002 | 2016 (UI)                | Percent change from 2002 | 2016 (UI)                                 | Percent change from 2002 | 2016 (UI)         | Percent change from 2002 (PA*) | 2016 (UI)           | Percent change from 2002 (PA*) | 2016 (UI)                 | Percent change from 2002 (PA*) | 2016 (UI)           | Percent change from 2002 (PA*) |
| Maine         | 8550<br>(7594, 9506)    | 44.9                     | 644<br>(572, 716)        | 41                       | 394<br>(349, 441)                         | 17.3                     | 215<br>(186, 244) | 19.6<br>(60.5)                 | 77<br>(63, 91)      | 18.8<br>(20.9)                 | 41 (34, 50)               | 11.8 (7.5)                     | 62<br>(50, 74)      | 11.8<br>(11.2)                 |
| Maryland      | 34418<br>(30696, 38351) | 40.9                     | 571<br>(509, 636)        | 27                       | 427<br>(380, 477)                         | 9.3                      | 237<br>(207, 269) | 11.6<br>(67.4)                 | 79<br>(66, 94)      | 14<br>(26.7)                   | 44 (36, 54)               | 1.7 (2)                        | 66<br>(55, 80)      | 2.2 (3.9)                      |
| Massachusetts | 37343<br>(33097, 41760) | 29                       | 547<br>(485, 612)        | 21                       | 381<br>(335, 429)                         | 8.8                      | 210<br>(181, 239) | 10.6<br>(65.1)                 | 75<br>(62, 89)      | 11.9<br>(25.9)                 | 38 (31, 46)               | 3.7 (4.4)                      | 58<br>(47, 71)      | 2.5 (4.5)                      |
| Michigan      | 63694<br>(56882, 70592) | 39.4                     | 643<br>(574, 712)        | 40.6                     | 448<br>(399, 499)                         | 17.4                     | 247<br>(217, 278) | 20.3<br>(62.6)                 | 85<br>(71, 101)     | 19.8<br>(21.1)                 | 46 (37, 55)               | 10.4 (6.5)                     | 70<br>(57, 83)      | 10.3 (9.8)                     |
| Minnesota     | 27902<br>(24496, 31136) | 51.3                     | 507<br>(445, 565)        | 37.6                     | 363<br>(316, 410)                         | 19.4                     | 197<br>(170, 226) | 22.6<br>(61.3)                 | 73<br>(60, 87)      | 22.3<br>(22.5)                 | 37 (29, 45)               | 11.4 (6.4)                     | 56<br>(45, 68)      | 11.5 (9.8)                     |
| Mississippi   | 27469<br>(24432, 30656) | 48.4                     | 919<br>(817, 1025)       | 41.9                     | 697<br>(620, 779)                         | 23.4                     | 392<br>(343, 442) | 27.5<br>(63.9)                 | 125<br>(104, 148)   | 25.9<br>(19.4)                 | 73 (58, 87)               | 13.8 (6.7)                     | 109<br>(90, 130)    | 13.9 (10)                      |
| Missouri      | 41045<br>(36920, 45196) | 49.2                     | 675<br>(607, 743)        | 39.1                     | 477<br>(427, 527)                         | 23.5                     | 265<br>(232, 298) | 27.7<br>(63)                   | 90<br>(76, 106)     | 25.2<br>(19.9)                 | 49 (39, 59)               | 14.5 (6.8)                     | 74<br>(61, 89)      | 14.5<br>(10.3)                 |

| Location      | DALY number               |                          | DALY per 100,000 persons |                          | Age-standardized DALY per 100,000 persons |                          |                   |                                |                     |                                |                           |                                |                     |                                |
|---------------|---------------------------|--------------------------|--------------------------|--------------------------|-------------------------------------------|--------------------------|-------------------|--------------------------------|---------------------|--------------------------------|---------------------------|--------------------------------|---------------------|--------------------------------|
|               |                           |                          |                          |                          | All causes                                |                          | Due to diabetes   |                                | Due to hypertension |                                | Due to glomerulonephritis |                                | Due to other causes |                                |
|               | 2016 (UI)                 | Percent change from 2002 | 2016 (UI)                | Percent change from 2002 | 2016 (UI)                                 | Percent change from 2002 | 2016 (UI)         | Percent change from 2002 (PA*) | 2016 (UI)           | Percent change from 2002 (PA*) | 2016 (UI)                 | Percent change from 2002 (PA*) | 2016 (UI)           | Percent change from 2002 (PA*) |
| Montana       | 5085<br>(4415, 5760)      | 52.3                     | 490<br>(426, 556)        | 33.7                     | 333<br>(288, 377)                         | 17                       | 182<br>(154, 210) | 20.7<br>(64.4)                 | 63<br>(51, 75)      | 17.8<br>(19.5)                 | 36 (28, 44)               | 9.9 (6.6)                      | 53<br>(43, 64)      | 9.5 (9.5)                      |
| Nebraska      | 10479<br>(9331, 11643)    | 44                       | 550<br>(490, 611)        | 30.7                     | 405<br>(360, 452)                         | 21.3                     | 222<br>(192, 255) | 24.5<br>(61.3)                 | 78<br>(65, 93)      | 24.9<br>(22)                   | 42 (33, 50)               | 13.3 (6.9)                     | 63<br>(51, 75)      | 12.6 (9.9)                     |
| Nevada        | 17919<br>(15875, 19888)   | 70.7                     | 611<br>(542, 678)        | 26.2                     | 463<br>(410, 514)                         | 6.3                      | 258<br>(225, 292) | 9.1<br>(77.7)                  | 86<br>(72, 101)     | 6.6<br>(19.1)                  | 47 (38, 57)               | 1.9 (3.1)                      | 72<br>(59, 85)      | 0 (0.1)                        |
| New Hampshire | 6884<br>(6030, 7756)      | 56.7                     | 516<br>(452, 582)        | 48.4                     | 343<br>(299, 389)                         | 19.1                     | 187<br>(160, 215) | 20.9<br>(58.8)                 | 67<br>(54, 79)      | 21 (21)                        | 36 (29, 45)               | 15.9 (9.1)                     | 54<br>(44, 66)      | 12.8<br>(11.1)                 |
| New Jersey    | 51137<br>(45268, 57293)   | 26                       | 571<br>(505, 639)        | 20                       | 405<br>(357, 454)                         | 6.8                      | 224<br>(196, 257) | 8.7<br>(68.8)                  | 78<br>(64, 93)      | 10.4<br>(28.2)                 | 41 (33, 50)               | 1.6 (2.5)                      | 62<br>(51, 75)      | 0.2 (0.6)                      |
| New Mexico    | 12684<br>(11097, 14230)   | 75.2                     | 612<br>(535, 687)        | 57                       | 445<br>(389, 500)                         | 30.7                     | 247<br>(213, 283) | 34.9<br>(61)                   | 81<br>(66, 96)      | 32.4<br>(18.9)                 | 47 (38, 57)               | 22.2 (8.2)                     | 70<br>(57, 84)      | 21.7<br>(11.9)                 |
| New York      | 100344<br>(88124, 113215) | 29.3                     | 506<br>(445, 571)        | 25.1                     | 366<br>(321, 416)                         | 10.8                     | 203<br>(174, 234) | 12.5<br>(63.3)                 | 69<br>(56, 83)      | 15.3<br>(25.6)                 | 38 (30, 46)               | 4.6 (4.6)                      | 57<br>(46, 69)      | 4.2 (6.5)                      |

| Location       | DALY number             |                          | DALY per 100,000 persons |                          | Age-standardized DALY per 100,000 persons |                          |                   |                                |                     |                                |                           |                                |                     |                                |
|----------------|-------------------------|--------------------------|--------------------------|--------------------------|-------------------------------------------|--------------------------|-------------------|--------------------------------|---------------------|--------------------------------|---------------------------|--------------------------------|---------------------|--------------------------------|
|                |                         |                          |                          |                          | All causes                                |                          | Due to diabetes   |                                | Due to hypertension |                                | Due to glomerulonephritis |                                | Due to other causes |                                |
|                | 2016 (UI)               | Percent change from 2002 | 2016 (UI)                | Percent change from 2002 | 2016 (UI)                                 | Percent change from 2002 | 2016 (UI)         | Percent change from 2002 (PA*) | 2016 (UI)           | Percent change from 2002 (PA*) | 2016 (UI)                 | Percent change from 2002 (PA*) | 2016 (UI)           | Percent change from 2002 (PA*) |
| North Carolina | 71062<br>(64146, 78431) | 67.2                     | 703<br>(635, 776)        | 37.9                     | 515<br>(463, 570)                         | 18                       | 288<br>(253, 323) | 21<br>(63.6)                   | 96<br>(80, 113)     | 20.1<br>(20.4)                 | 52 (42, 63)               | 11.5 (6.9)                     | 79<br>(65, 95)      | 9.9 (9.1)                      |
| North Dakota   | 3781<br>(3326, 4230)    | 45.9                     | 491<br>(432, 549)        | 20.9                     | 376<br>(328, 422)                         | 23.9                     | 206<br>(177, 237) | 27.1<br>(60.5)                 | 71<br>(58, 84)      | 25.9<br>(20)                   | 40 (32, 49)               | 17.2 (8)                       | 59<br>(48, 72)      | 16.4<br>(11.5)                 |
| Ohio           | 79979<br>(71828, 88129) | 40.6                     | 689<br>(619, 759)        | 38.2                     | 482<br>(432, 532)                         | 20.7                     | 267<br>(236, 300) | 24<br>(62.5)                   | 91<br>(76, 107)     | 22.3<br>(20)                   | 49 (40, 59)               | 13.8 (7.2)                     | 74<br>(61, 90)      | 13 (10.3)                      |
| Oklahoma       | 25736<br>(23271, 28444) | 60.7                     | 658<br>(595, 727)        | 43.3                     | 500<br>(451, 553)                         | 32.9                     | 278<br>(246, 313) | 37.8<br>(61.7)                 | 92<br>(77, 109)     | 34.1<br>(18.9)                 | 52 (42, 62)               | 22.7 (7.8)                     | 78<br>(65, 93)      | 22.7<br>(11.7)                 |
| Oregon         | 20206<br>(17617, 22570) | 63                       | 500<br>(436, 558)        | 41.5                     | 342<br>(296, 384)                         | 21.3                     | 188<br>(161, 215) | 24.1<br>(60.8)                 | 67<br>(55, 78)      | 24.9<br>(22.2)                 | 35 (28, 42)               | 14.1 (7.2)                     | 53<br>(43, 64)      | 12.6 (9.8)                     |
| Pennsylvania   | 86406<br>(77442, 95932) | 27.1                     | 677<br>(607, 751)        | 22.5                     | 445<br>(396, 496)                         | 12                       | 246<br>(215, 279) | 14.4<br>(64.9)                 | 85<br>(71, 100)     | 15<br>(23.4)                   | 45 (37, 54)               | 5.5 (4.9)                      | 69<br>(55, 83)      | 5 (6.8)                        |
| Rhode Island   | 5502<br>(4752, 6195)    | 28.9                     | 521<br>(450, 587)        | 29.8                     | 355<br>(307, 403)                         | 16.8                     | 196<br>(167, 225) | 19.2<br>(61.4)                 | 68<br>(55, 81)      | 20.9<br>(22.9)                 | 37 (29, 45)               | 9.7 (6.4)                      | 55<br>(45, 67)      | 9.6 (9.4)                      |

| Location       | DALY number                |                          | DALY per 100,000 persons |                          | Age-standardized DALY per 100,000 persons |                          |                   |                                |                     |                                |                           |                                |                     |                                |
|----------------|----------------------------|--------------------------|--------------------------|--------------------------|-------------------------------------------|--------------------------|-------------------|--------------------------------|---------------------|--------------------------------|---------------------------|--------------------------------|---------------------|--------------------------------|
|                |                            |                          |                          |                          | All causes                                |                          | Due to diabetes   |                                | Due to hypertension |                                | Due to glomerulonephritis |                                | Due to other causes |                                |
|                | 2016 (UI)                  | Percent change from 2002 | 2016 (UI)                | Percent change from 2002 | 2016 (UI)                                 | Percent change from 2002 | 2016 (UI)         | Percent change from 2002 (PA*) | 2016 (UI)           | Percent change from 2002 (PA*) | 2016 (UI)                 | Percent change from 2002 (PA*) | 2016 (UI)           | Percent change from 2002 (PA*) |
| South Carolina | 38273<br>(34135, 42441)    | 65.7                     | 776<br>(692, 860)        | 37.8                     | 550<br>(488, 611)                         | 15.1                     | 307<br>(269, 349) | 17.7<br>(63.9)                 | 102<br>(85, 121)    | 19.2<br>(22.8)                 | 56 (46, 67)               | 7.9 (5.7)                      | 85<br>(70, 102)     | 7 (7.6)                        |
| South Dakota   | 4397<br>(3862, 4932)       | 50.2                     | 508<br>(446, 570)        | 32                       | 365<br>(319, 411)                         | 22.7                     | 200<br>(171, 229) | 26.4<br>(61.9)                 | 68<br>(56, 80)      | 24.4<br>(19.7)                 | 39 (31, 48)               | 14.5 (7.4)                     | 58<br>(48, 71)      | 14.6 (11)                      |
| Tennessee      | 45521<br>(40988, 50183)    | 67.8                     | 687<br>(618, 757)        | 46.8                     | 501<br>(449, 553)                         | 27.9                     | 279<br>(245, 313) | 32.3<br>(62.4)                 | 93<br>(77, 110)     | 31.8<br>(20.5)                 | 52 (42, 62)               | 16.4 (6.7)                     | 77<br>(64, 92)      | 17.4<br>(10.5)                 |
| Texas          | 162865<br>(145554, 180379) | 92                       | 585<br>(523, 648)        | 49.9                     | 503<br>(448, 556)                         | 30.9                     | 282<br>(246, 316) | 35<br>(61.5)                   | 94<br>(79, 113)     | 34.9<br>(20.5)                 | 50 (41, 61)               | 19.7 (7)                       | 77<br>(63, 92)      | 20.5 (11)                      |
| Utah           | 12062<br>(10675, 13524)    | 83.4                     | 398<br>(353, 447)        | 41.7                     | 388<br>(342, 435)                         | 23.4                     | 212<br>(183, 240) | 26.2<br>(60)                   | 76<br>(63, 90)      | 27.3<br>(22.3)                 | 39 (32, 48)               | 15.2 (7.1)                     | 60<br>(49, 73)      | 15 (10.6)                      |
| Vermont        | 3082<br>(2704, 3476)       | 43                       | 494<br>(433, 557)        | 40.6                     | 321<br>(281, 363)                         | 15.8                     | 175<br>(151, 203) | 18<br>(60.8)                   | 62<br>(51, 74)      | 18.2<br>(21.6)                 | 34 (28, 41)               | 11 (7.7)                       | 50<br>(41, 61)      | 9.5 (9.9)                      |
| Virginia       | 52548<br>(47199, 58081)    | 53.9                     | 624<br>(560, 690)        | 33.1                     | 468<br>(419, 518)                         | 13.9                     | 260<br>(227, 294) | 16.5<br>(64.3)                 | 90<br>(75, 106)     | 17.3<br>(23.1)                 | 47 (38, 56)               | 6.6 (5.1)                      | 72<br>(59, 86)      | 6.3 (7.5)                      |



| Location      | DALY number             |                          | DALY per 100,000 persons |                          | Age-standardized DALY per 100,000 persons |                          |                   |                                |                     |                                |                           |                                |                     |                                |
|---------------|-------------------------|--------------------------|--------------------------|--------------------------|-------------------------------------------|--------------------------|-------------------|--------------------------------|---------------------|--------------------------------|---------------------------|--------------------------------|---------------------|--------------------------------|
|               |                         |                          |                          |                          | All causes                                |                          | Due to diabetes   |                                | Due to hypertension |                                | Due to glomerulonephritis |                                | Due to other causes |                                |
|               | 2016 (UI)               | Percent change from 2002 | 2016 (UI)                | Percent change from 2002 | 2016 (UI)                                 | Percent change from 2002 | 2016 (UI)         | Percent change from 2002 (PA*) | 2016 (UI)           | Percent change from 2002 (PA*) | 2016 (UI)                 | Percent change from 2002 (PA*) | 2016 (UI)           | Percent change from 2002 (PA*) |
| Washington    | 31904<br>(27876, 35781) | 79.4                     | 442<br>(386, 496)        | 50.3                     | 328<br>(285, 369)                         | 28.5                     | 180<br>(154, 207) | 31.8<br>(59.7)                 | 64<br>(52, 76)      | 34.1<br>(22.3)                 | 34 (27, 41)               | 17.7 (6.9)                     | 51<br>(41, 62)      | 19 (11.1)                      |
| West Virginia | 16506<br>(14969, 18203) | 48.3                     | 901<br>(817, 994)        | 46.1                     | 587<br>(529, 647)                         | 31.3                     | 326<br>(289, 366) | 35.6<br>(61.2)                 | 109<br>(91, 128)    | 32.3<br>(19)                   | 61 (49, 72)               | 22.4 (8)                       | 91<br>(76, 109)     | 22.1<br>(11.8)                 |
| Wisconsin     | 33598<br>(29912, 37307) | 49.6                     | 582<br>(518, 646)        | 40.8                     | 401<br>(355, 447)                         | 21.8                     | 219<br>(191, 249) | 24.8<br>(60.4)                 | 79<br>(66, 93)      | 26<br>(22.8)                   | 41 (33, 50)               | 13.2 (6.6)                     | 62<br>(51, 75)      | 13.5<br>(10.2)                 |
| Wyoming       | 2634<br>(2282, 2982)    | 54.1                     | 451<br>(391, 510)        | 31.7                     | 343<br>(297, 389)                         | 17.8                     | 189<br>(161, 218) | 21.3<br>(64.1)                 | 64<br>(52, 76)      | 19.9<br>(20.5)                 | 36 (29, 44)               | 9.8 (6.3)                      | 54<br>(44, 66)      | 9.7 (9.2)                      |

DALY: Disability Adjusted Life Year

UI is the uncertainty interval, it reflects the certainty of an estimate based on data availability, studies size and consistency across data sources

\*PA: Percentage attributed to overall rate is the proportion of overall age-standardized rate change attributed by each of the following four causes: diabetes, hypertension, glomerulonephritis and other causes

**eTable 3:** Number and age-standardized rate for overall Deaths due to CKD and by cause, with percentage change from 2002 to 2016 for the United States and by state and district.

| Location      | Death number            |                          | Death per 100,000 persons |                          | Age-standardized Death per 100,000 persons |                          |                 |                                |                     |                                |                           |                                |                     |                                |
|---------------|-------------------------|--------------------------|---------------------------|--------------------------|--------------------------------------------|--------------------------|-----------------|--------------------------------|---------------------|--------------------------------|---------------------------|--------------------------------|---------------------|--------------------------------|
|               |                         |                          |                           |                          | All causes                                 |                          | Due to diabetes |                                | Due to hypertension |                                | Due to glomerulonephritis |                                | Due to other causes |                                |
|               | 2016 (UI)               | Percent change from 2002 | 2016 (UI)                 | Percent change from 2002 | 2016 (UI)                                  | Percent change from 2002 | 2016 (UI)       | Percent change from 2002 (PA*) | 2016 (UI)           | Percent change from 2002 (PA*) | 2016 (UI)                 | Percent change from 2002 (PA*) | 2016 (UI)           | Percent change from 2002 (PA*) |
| United States | 82539<br>(80298, 84652) | 58.3                     | 26<br>(25, 26)            | 41.1                     | 16<br>(16, 17)                             | 17.9                     | 8 (8, 9)        | 20 (55.6)                      | 5 (4, 5)            | 19.8 (30.6)                    | 1 (1, 2)                  | 11.1 (4.9)                     | 2 (2, 3)            | 11 (8.9)                       |
| Alabama       | 1703<br>(1518, 1890)    | 40.1                     | 35<br>(31, 39)            | 29.2                     | 23<br>(20, 25)                             | 11.2                     | 12<br>(10, 14)  | 15.3 (68)                      | 6 (5, 7)            | 8.1 (19.9)                     | 2 (1, 2)                  | 7.3 (5.2)                      | 3 (3, 4)            | 5.3 (7)                        |
| Alaska        | 88 (78, 98)             | 117                      | 12<br>(11, 13)            | 90.8                     | 13<br>(11, 14)                             | 30.1                     | 6 (5, 7)        | 30.1 (49.3)                    | 4 (3, 4)            | 37.2 (34.2)                    | 1 (1, 1)                  | 20.7 (5.5)                     | 2 (1, 2)            | 22.3 (10.9)                    |
| Arizona       | 1447<br>(1320, 1577)    | 81.1                     | 21<br>(19, 23)            | 41.5                     | 13<br>(12, 14)                             | 11.7                     | 7 (6, 8)        | 15.2 (64.3)                    | 4 (3, 4)            | 10.5 (24.9)                    | 1 (1, 1)                  | 6.3 (4.2)                      | 2 (1, 2)            | 5.3 (6.5)                      |
| Arkansas      | 1006<br>(925, 1090)     | 59                       | 34<br>(31, 37)            | 44.5                     | 21<br>(20, 23)                             | 29.2                     | 11<br>(10, 12)  | 32.6 (55.7)                    | 6 (5, 7)            | 29.4 (27.4)                    | 2 (1, 2)                  | 21.8 (6.1)                     | 3 (2, 4)            | 21.4 (10.8)                    |
| California    | 7415<br>(6665, 8159)    | 89.2                     | 19<br>(17, 21)            | 67.6                     | 13<br>(12, 15)                             | 31.5                     | 7 (6, 8)        | 32.7 (52.3)                    | 4 (3, 4)            | 36.9 (31.9)                    | 1 (1, 1)                  | 21.3 (5.3)                     | 2 (1, 2)            | 22.7 (10.5)                    |

| Location             | Death number      |                          | Death per 100,000 persons |                          | Age-standardized Death per 100,000 persons |                          |                 |                                |                     |                                |                           |                                |                     |                                |
|----------------------|-------------------|--------------------------|---------------------------|--------------------------|--------------------------------------------|--------------------------|-----------------|--------------------------------|---------------------|--------------------------------|---------------------------|--------------------------------|---------------------|--------------------------------|
|                      |                   |                          |                           |                          | All causes                                 |                          | Due to diabetes |                                | Due to hypertension |                                | Due to glomerulonephritis |                                | Due to other causes |                                |
|                      | 2016 (UI)         | Percent change from 2002 | 2016 (UI)                 | Percent change from 2002 | 2016 (UI)                                  | Percent change from 2002 | 2016 (UI)       | Percent change from 2002 (PA*) | 2016 (UI)           | Percent change from 2002 (PA*) | 2016 (UI)                 | Percent change from 2002 (PA*) | 2016 (UI)           | Percent change from 2002 (PA*) |
| Colorado             | 891 (817, 974)    | 74.8                     | 16 (15, 18)               | 42.5                     | 12 (11, 13)                                | 9.3                      | 6 (5, 7)        | 11.2 (58.2)                    | 4 (3, 4)            | 10.8 (34.1)                    | 1 (1, 1)                  | 3.2 (2.7)                      | 2 (1, 2)            | 3.3 (5.1)                      |
| Connecticut          | 834 (755, 925)    | 34.7                     | 23 (21, 26)               | 29.7                     | 13 (12, 14)                                | 9.3                      | 6 (5, 7)        | 9 (48.1)                       | 4 (3, 5)            | 14.6 (44.3)                    | 1 (1, 1)                  | 2.8 (2.4)                      | 2 (1, 2)            | 3.4 (5.3)                      |
| Delaware             | 261 (240, 281)    | 74.1                     | 27 (25, 30)               | 47.3                     | 16 (15, 18)                                | 15.4                     | 8 (7, 9)        | 16.9 (55)                      | 5 (4, 5)            | 17.8 (31.7)                    | 1 (1, 2)                  | 9.6 (5)                        | 2 (2, 3)            | 8.7 (8.3)                      |
| District of Columbia | 154 (137, 170)    | 5.1                      | 22 (20, 25)               | -11                      | 19 (17, 21)                                | -8.5                     | 10 (9, 11)      | -6.6 (41)                      | 5 (4, 6)            | -4.6 (13)                      | 1 (1, 2)                  | -18.2 (18.2)                   | 3 (2, 3)            | -15.9 (27.9)                   |
| Florida              | 5401 (4948, 5917) | 70.9                     | 26 (24, 29)               | 39.4                     | 13 (12, 15)                                | 20.5                     | 7 (6, 8)        | 24.7 (60.1)                    | 4 (3, 4)            | 19.1 (25.4)                    | 1 (1, 1)                  | 13.4 (5.2)                     | 2 (2, 2)            | 13 (9.3)                       |
| Georgia              | 2926 (2644, 3253) | 69.6                     | 28 (26, 32)               | 40.5                     | 22 (20, 25)                                | 10.6                     | 11 (10, 13)     | 12 (57.2)                      | 6 (5, 7)            | 13.3 (34.1)                    | 2 (1, 2)                  | 4 (3)                          | 3 (2, 4)            | 4.1 (5.7)                      |
| Hawaii               | 333 (307, 359)    | 85.2                     | 23 (21, 25)               | 60.3                     | 13 (12, 14)                                | 21.9                     | 7 (6, 7)        | 25.3 (57.6)                    | 4 (3, 4)            | 21.5 (27.1)                    | 1 (1, 1)                  | 15.8 (5.6)                     | 2 (1, 2)            | 14.7 (9.7)                     |

| Location  | Death number      |                          | Death per 100,000 persons |                          | Age-standardized Death per 100,000 persons |                          |                 |                                |                     |                                |                           |                                |                     |                                |
|-----------|-------------------|--------------------------|---------------------------|--------------------------|--------------------------------------------|--------------------------|-----------------|--------------------------------|---------------------|--------------------------------|---------------------------|--------------------------------|---------------------|--------------------------------|
|           |                   |                          |                           |                          | All causes                                 |                          | Due to diabetes |                                | Due to hypertension |                                | Due to glomerulonephritis |                                | Due to other causes |                                |
|           | 2016 (UI)         | Percent change from 2002 | 2016 (UI)                 | Percent change from 2002 | 2016 (UI)                                  | Percent change from 2002 | 2016 (UI)       | Percent change from 2002 (PA*) | 2016 (UI)           | Percent change from 2002 (PA*) | 2016 (UI)                 | Percent change from 2002 (PA*) | 2016 (UI)           | Percent change from 2002 (PA*) |
| Idaho     | 340 (305, 377)    | 105.4                    | 20 (18, 22)               | 64                       | 14 (12, 15)                                | 34.6                     | 7 (6, 8)        | 36.8 (51.2)                    | 4 (3, 5)            | 36.7 (31.3)                    | 1 (1, 1)                  | 27.2 (6)                       | 2 (1, 2)            | 27.3 (11.4)                    |
| Illinois  | 3610 (3335, 3905) | 37.2                     | 28 (26, 30)               | 34                       | 18 (17, 20)                                | 11.1                     | 9 (8, 10)       | 12.1 (54.5)                    | 5 (4, 6)            | 15.1 (37.6)                    | 1 (1, 2)                  | 3.4 (2.4)                      | 2 (2, 3)            | 4.2 (5.6)                      |
| Indiana   | 2150 (1938, 2386) | 56.4                     | 32 (29, 36)               | 45.1                     | 21 (19, 23)                                | 23.6                     | 11 (9, 12)      | 25.5 (53.2)                    | 6 (5, 7)            | 25.3 (30.6)                    | 2 (1, 2)                  | 17.7 (5.8)                     | 3 (2, 4)            | 16.8 (10.3)                    |
| Iowa      | 724 (664, 794)    | 63.1                     | 23 (21, 25)               | 52.5                     | 13 (11, 14)                                | 41                       | 6 (5, 7)        | 43.2 (51.1)                    | 4 (3, 4)            | 43.8 (31.2)                    | 1 (1, 1)                  | 32.1 (6.1)                     | 2 (1, 2)            | 32.8 (11.6)                    |
| Kansas    | 812 (727, 903)    | 40.4                     | 28 (25, 31)               | 30.9                     | 17 (15, 19)                                | 19.1                     | 9 (7, 10)       | 22.7 (57.9)                    | 5 (4, 6)            | 18 (27.2)                      | 1 (1, 2)                  | 13.4 (5.4)                     | 2 (2, 3)            | 12.4 (9.4)                     |
| Kentucky  | 1482 (1370, 1609) | 58.8                     | 33 (31, 36)               | 46.8                     | 22 (20, 24)                                | 24.1                     | 11 (10, 13)     | 27.4 (56.1)                    | 6 (5, 7)            | 23.4 (27.5)                    | 2 (1, 2)                  | 18.4 (6)                       | 3 (2, 4)            | 17.3 (10.4)                    |
| Louisiana | 1798 (1669, 1940) | 41.7                     | 38 (36, 41)               | 36.3                     | 28 (26, 30)                                | 15.2                     | 14 (13, 16)     | 17 (56.8)                      | 7 (6, 9)            | 17.6 (30.6)                    | 2 (2, 3)                  | 8.4 (4.5)                      | 4 (3, 5)            | 8.3 (8.1)                      |

| Location      | Death number      |                          | Death per 100,000 persons |                          | Age-standardized Death per 100,000 persons |                          |                 |                                |                     |                                |                           |                                |                     |                                |
|---------------|-------------------|--------------------------|---------------------------|--------------------------|--------------------------------------------|--------------------------|-----------------|--------------------------------|---------------------|--------------------------------|---------------------------|--------------------------------|---------------------|--------------------------------|
|               |                   |                          |                           |                          | All causes                                 |                          | Due to diabetes |                                | Due to hypertension |                                | Due to glomerulonephritis |                                | Due to other causes |                                |
|               | 2016 (UI)         | Percent change from 2002 | 2016 (UI)                 | Percent change from 2002 | 2016 (UI)                                  | Percent change from 2002 | 2016 (UI)       | Percent change from 2002 (PA*) | 2016 (UI)           | Percent change from 2002 (PA*) | 2016 (UI)                 | Percent change from 2002 (PA*) | 2016 (UI)           | Percent change from 2002 (PA*) |
| Maine         | 400 (369, 432)    | 50.1                     | 30 (28, 33)               | 46.1                     | 15 (14, 17)                                | 15.5                     | 7 (7, 8)        | 16.5 (51.6)                    | 5 (4, 5)            | 18.3 (34.6)                    | 1 (1, 1)                  | 9.6 (4.8)                      | 2 (2, 3)            | 9.6 (9)                        |
| Maryland      | 1384 (1281, 1497) | 48.9                     | 23 (21, 25)               | 34.2                     | 15 (14, 17)                                | 7.4                      | 8 (7, 9)        | 8.4 (56.9)                     | 4 (4, 5)            | 11.3 (40.4)                    | 1 (1, 1)                  | 0.6 (0.7)                      | 2 (2, 3)            | 1 (2)                          |
| Massachusetts | 1768 (1615, 1916) | 29.8                     | 26 (24, 28)               | 21.8                     | 15 (14, 16)                                | 5.4                      | 7 (6, 8)        | 5.7 (50.9)                     | 4 (4, 5)            | 9.2 (47.9)                     | 1 (1, 1)                  | -0.4 (0.6)                     | 2 (2, 3)            | -0.2 (0.6)                     |
| Michigan      | 2828 (2623, 3032) | 46.6                     | 29 (26, 31)               | 47.9                     | 17 (16, 18)                                | 15.8                     | 9 (8, 10)       | 17.7 (55.4)                    | 5 (4, 6)            | 17.3 (30.9)                    | 1 (1, 2)                  | 9.9 (4.9)                      | 2 (2, 3)            | 9.5 (8.7)                      |
| Minnesota     | 1352 (1236, 1476) | 58.2                     | 25 (22, 27)               | 43.8                     | 15 (13, 16)                                | 20.5                     | 7 (6, 8)        | 22.3 (51.8)                    | 5 (4, 5)            | 22.4 (33.3)                    | 1 (1, 1)                  | 13.7 (5.1)                     | 2 (2, 2)            | 13.9 (9.8)                     |
| Mississippi   | 1179 (1059, 1310) | 48.3                     | 39 (35, 44)               | 41.8                     | 27 (24, 30)                                | 20.7                     | 14 (12, 16)     | 24.1 (59)                      | 7 (6, 9)            | 20.3 (25.7)                    | 2 (2, 3)                  | 14.3 (5.7)                     | 4 (3, 5)            | 13.5 (9.6)                     |
| Missouri      | 1851 (1711, 2001) | 50.2                     | 30 (28, 33)               | 40                       | 18 (17, 20)                                | 21.5                     | 9 (8, 10)       | 24.7 (56.7)                    | 5 (4, 6)            | 21.3 (28)                      | 1 (1, 2)                  | 14.9 (5.5)                     | 3 (2, 3)            | 14.4 (9.8)                     |

| Location      | Death number      |                          | Death per 100,000 persons |                          | Age-standardized Death per 100,000 persons |                          |                 |                                |                     |                                |                           |                                |                     |                                |
|---------------|-------------------|--------------------------|---------------------------|--------------------------|--------------------------------------------|--------------------------|-----------------|--------------------------------|---------------------|--------------------------------|---------------------------|--------------------------------|---------------------|--------------------------------|
|               |                   |                          |                           |                          | All causes                                 |                          | Due to diabetes |                                | Due to hypertension |                                | Due to glomerulonephritis |                                | Due to other causes |                                |
|               | 2016 (UI)         | Percent change from 2002 | 2016 (UI)                 | Percent change from 2002 | 2016 (UI)                                  | Percent change from 2002 | 2016 (UI)       | Percent change from 2002 (PA*) | 2016 (UI)           | Percent change from 2002 (PA*) | 2016 (UI)                 | Percent change from 2002 (PA*) | 2016 (UI)           | Percent change from 2002 (PA*) |
| Montana       | 209 (187, 233)    | 53                       | 20 (18, 23)               | 34.4                     | 11 (10, 13)                                | 12.3                     | 6 (5, 7)        | 15.3 (59.8)                    | 3 (3, 4)            | 11.4 (27.3)                    | 1 (1, 1)                  | 7.9 (5)                        | 2 (1, 2)            | 6.6 (7.9)                      |
| Nebraska      | 491 (450, 531)    | 47.5                     | 26 (24, 28)               | 33.8                     | 16 (14, 17)                                | 22.6                     | 8 (7, 9)        | 24 (51.9)                      | 5 (4, 5)            | 25.4 (32.6)                    | 1 (1, 1)                  | 15.9 (5.4)                     | 2 (2, 3)            | 15.7 (10.1)                    |
| Nevada        | 701 (639, 763)    | 71.2                     | 24 (22, 26)               | 26.6                     | 17 (16, 19)                                | -2.8                     | 9 (8, 10)       | -0.7 (11.7)                    | 5 (4, 6)            | -2.7 (26.4)                    | 1 (1, 2)                  | -7 (19.6)                      | 2 (2, 3)            | -8.1 (42.2)                    |
| New Hampshire | 295 (271, 320)    | 70.8                     | 22 (20, 24)               | 61.7                     | 12 (11, 14)                                | 18.8                     | 6 (5, 7)        | 20.3 (52)                      | 4 (3, 4)            | 20.4 (32)                      | 1 (1, 1)                  | 14.3 (5.8)                     | 2 (1, 2)            | 13.3 (10.2)                    |
| New Jersey    | 2274 (2079, 2475) | 28.3                     | 25 (23, 28)               | 22.2                     | 15 (14, 17)                                | 2.9                      | 8 (7, 9)        | 3.6 (42.6)                     | 4 (4, 5)            | 6.2 (41.5)                     | 1 (1, 1)                  | -3.2 (5.9)                     | 2 (2, 3)            | -2.9 (9.9)                     |
| New Mexico    | 510 (454, 569)    | 92.5                     | 25 (22, 27)               | 72.5                     | 16 (14, 18)                                | 32.4                     | 8 (7, 9)        | 35.8 (55)                      | 4 (4, 5)            | 32.1 (27.1)                    | 1 (1, 1)                  | 26.4 (6.6)                     | 2 (2, 3)            | 24.9 (11.3)                    |
| New York      | 4006 (3589, 4458) | 33.2                     | 20 (18, 23)               | 28.8                     | 12 (11, 14)                                | 7.9                      | 6 (5, 7)        | 8.1 (51.8)                     | 4 (3, 4)            | 12.9 (44.2)                    | 1 (1, 1)                  | 1 (1)                          | 2 (1, 2)            | 1.6 (3)                        |

| Location       | Death number         |                          | Death per 100,000 persons |                          | Age-standardized Death per 100,000 persons |                          |                 |                                |                     |                                |                           |                                |                     |                                |
|----------------|----------------------|--------------------------|---------------------------|--------------------------|--------------------------------------------|--------------------------|-----------------|--------------------------------|---------------------|--------------------------------|---------------------------|--------------------------------|---------------------|--------------------------------|
|                |                      |                          |                           |                          | All causes                                 |                          | Due to diabetes |                                | Due to hypertension |                                | Due to glomerulonephritis |                                | Due to other causes |                                |
|                | 2016 (UI)            | Percent change from 2002 | 2016 (UI)                 | Percent change from 2002 | 2016 (UI)                                  | Percent change from 2002 | 2016 (UI)       | Percent change from 2002 (PA*) | 2016 (UI)           | Percent change from 2002 (PA*) | 2016 (UI)                 | Percent change from 2002 (PA*) | 2016 (UI)           | Percent change from 2002 (PA*) |
| North Carolina | 3009<br>(2785, 3235) | 71.4                     | 30<br>(28, 32)            | 41.3                     | 20<br>(18, 21)                             | 14.6                     | 10<br>(9, 11)   | 17.1<br>(58.6)                 | 5 (5, 6)            | 15.3<br>(28.6)                 | 1 (1, 2)                  | 8.7 (4.7)                      | 3 (2, 3)            | 8.1 (8)                        |
| North Dakota   | 173 (156, 189)       | 46.8                     | 22<br>(20, 25)            | 21.7                     | 13<br>(12, 15)                             | 23.7                     | 7 (6, 8)        | 26.2<br>(53.4)                 | 4 (3, 5)            | 24<br>(29.6)                   | 1 (1, 1)                  | 18.8 (6.1)                     | 2 (1, 2)            | 17.8<br>(10.9)                 |
| Ohio           | 3566<br>(3319, 3824) | 43.5                     | 31<br>(29, 33)            | 41                       | 18<br>(17, 20)                             | 17.6                     | 9 (8, 11)       | 20 (56.5)                      | 5 (4, 6)            | 18.1<br>(28.8)                 | 1 (1, 2)                  | 12.2 (5.4)                     | 3 (2, 3)            | 11.1<br>(9.2)                  |
| Oklahoma       | 1083<br>(1000, 1166) | 61.4                     | 28<br>(26, 30)            | 43.9                     | 19<br>(17, 20)                             | 32.3                     | 10<br>(8, 11)   | 37 (56.5)                      | 5 (4, 6)            | 30<br>(25.9)                   | 1 (1, 2)                  | 26 (6.4)                       | 3 (2, 3)            | 24.6<br>(11.2)                 |
| Oregon         | 865 (798, 932)       | 72.6                     | 21<br>(20, 23)            | 49.8                     | 12<br>(12, 13)                             | 24                       | 6 (5, 7)        | 25.6 (52)                      | 4 (3, 4)            | 26.8<br>(32.6)                 | 1 (1, 1)                  | 16.3 (5.2)                     | 2 (1, 2)            | 16.8<br>(10.1)                 |
| Pennsylvania   | 4170<br>(3879, 4494) | 30.6                     | 33<br>(30, 35)            | 25.9                     | 17<br>(16, 19)                             | 10.1                     | 9 (8, 10)       | 11.2<br>(54.9)                 | 5 (4, 6)            | 13.1<br>(36.5)                 | 1 (1, 2)                  | 3.9 (3)                        | 2 (2, 3)            | 3.9 (5.6)                      |
| Rhode Island   | 243 (218, 268)       | 37.1                     | 23<br>(21, 25)            | 38                       | 13<br>(11, 14)                             | 19.4                     | 6 (5, 7)        | 19.6<br>(50.4)                 | 4 (3, 4)            | 24.4<br>(35.1)                 | 1 (1, 1)                  | 12.5 (5)                       | 2 (1, 2)            | 12.7<br>(9.5)                  |

| Location       | Death number         |                          | Death per 100,000 persons |                          | Age-standardized Death per 100,000 persons |                          |                 |                                |                     |                                |                           |                                |                     |                                |
|----------------|----------------------|--------------------------|---------------------------|--------------------------|--------------------------------------------|--------------------------|-----------------|--------------------------------|---------------------|--------------------------------|---------------------------|--------------------------------|---------------------|--------------------------------|
|                |                      |                          |                           |                          | All causes                                 |                          | Due to diabetes |                                | Due to hypertension |                                | Due to glomerulonephritis |                                | Due to other causes |                                |
|                | 2016 (UI)            | Percent change from 2002 | 2016 (UI)                 | Percent change from 2002 | 2016 (UI)                                  | Percent change from 2002 | 2016 (UI)       | Percent change from 2002 (PA*) | 2016 (UI)           | Percent change from 2002 (PA*) | 2016 (UI)                 | Percent change from 2002 (PA*) | 2016 (UI)           | Percent change from 2002 (PA*) |
| South Carolina | 1630<br>(1477, 1806) | 73.1                     | 33<br>(30, 37)            | 43.9                     | 21<br>(19, 24)                             | 13.9                     | 11<br>(10, 13)  | 14.7<br>(53.7)                 | 6 (5, 7)            | 18.2<br>(34.8)                 | 2 (1, 2)                  | 7 (4.1)                        | 3 (2, 4)            | 7.1 (7.4)                      |
| South Dakota   | 192 (175, 212)       | 51.4                     | 22<br>(20, 24)            | 33.1                     | 12<br>(11, 14)                             | 21.1                     | 6 (5, 7)        | 23.8<br>(54.8)                 | 4 (3, 4)            | 21.1<br>(28.7)                 | 1 (1, 1)                  | 16.1 (6.1)                     | 2 (1, 2)            | 14.9<br>(10.4)                 |
| Tennessee      | 1906<br>(1757, 2041) | 79.3                     | 29<br>(26, 31)            | 56.8                     | 19<br>(18, 20)                             | 31.6                     | 10<br>(8, 11)   | 34.2<br>(54.1)                 | 5 (4, 6)            | 33.8<br>(29.2)                 | 1 (1, 2)                  | 23 (5.9)                       | 3 (2, 3)            | 23.2<br>(10.8)                 |
| Texas          | 6449<br>(5974, 6974) | 101.9                    | 23<br>(21, 25)            | 57.6                     | 19<br>(18, 21)                             | 32.9                     | 10<br>(9, 11)   | 36.5<br>(55.5)                 | 5 (4, 6)            | 33<br>(27.6)                   | 1 (1, 2)                  | 24.9 (6)                       | 3 (2, 3)            | 24.7<br>(10.9)                 |
| Utah           | 479 (443, 518)       | 94.5                     | 16<br>(15, 17)            | 50.4                     | 15<br>(14, 16)                             | 27.5                     | 7 (6, 8)        | 29.5<br>(51.7)                 | 4 (4, 5)            | 29.7<br>(31.8)                 | 1 (1, 1)                  | 20.4 (5.7)                     | 2 (2, 3)            | 20.4<br>(10.8)                 |
| Vermont        | 131 (120, 143)       | 56.7                     | 21<br>(19, 23)            | 54                       | 11<br>(10, 12)                             | 16.4                     | 5 (5, 6)        | 16.4<br>(48.5)                 | 3 (3, 4)            | 20.9<br>(37)                   | 1 (1, 1)                  | 10.6 (5)                       | 2 (1, 2)            | 10.8<br>(9.5)                  |
| Virginia       | 2274<br>(2099, 2460) | 62.1                     | 27<br>(25, 29)            | 40.2                     | 19<br>(17, 20)                             | 12.8                     | 9 (8, 11)       | 13.7<br>(53.2)                 | 5 (5, 6)            | 16.8<br>(36.3)                 | 1 (1, 2)                  | 5.8 (3.5)                      | 3 (2, 3)            | 6.2 (7)                        |



| Location      | Death number         |                          | Death per 100,000 persons |                          | Age-standardized Death per 100,000 persons |                          |                 |                                |                     |                                |                           |                                |                     |                                |
|---------------|----------------------|--------------------------|---------------------------|--------------------------|--------------------------------------------|--------------------------|-----------------|--------------------------------|---------------------|--------------------------------|---------------------------|--------------------------------|---------------------|--------------------------------|
|               |                      |                          |                           |                          | All causes                                 |                          | Due to diabetes |                                | Due to hypertension |                                | Due to glomerulonephritis |                                | Due to other causes |                                |
|               | 2016 (UI)            | Percent change from 2002 | 2016 (UI)                 | Percent change from 2002 | 2016 (UI)                                  | Percent change from 2002 | 2016 (UI)       | Percent change from 2002 (PA*) | 2016 (UI)           | Percent change from 2002 (PA*) | 2016 (UI)                 | Percent change from 2002 (PA*) | 2016 (UI)           | Percent change from 2002 (PA*) |
| Washington    | 1281<br>(1186, 1382) | 102.3                    | 18<br>(16, 19)            | 69.4                     | 12<br>(11, 13)                             | 38.1                     | 6 (5, 7)        | 40.1 (51)                      | 3 (3, 4)            | 41.4 (31.8)                    | 1 (1, 1)                  | 29 (5.8)                       | 2 (1, 2)            | 29.9 (11.3)                    |
| West Virginia | 754 (698, 820)       | 51                       | 41<br>(38, 45)            | 48.8                     | 23<br>(22, 25)                             | 30.6                     | 12<br>(10, 13)  | 34 (55.1)                      | 6 (5, 8)            | 30.5 (27.7)                    | 2 (1, 2)                  | 23.7 (6.2)                     | 3 (3, 4)            | 23 (11)                        |
| Wisconsin     | 1613<br>(1486, 1728) | 59.2                     | 28<br>(26, 30)            | 49.9                     | 16<br>(15, 17)                             | 25.3                     | 8 (7, 9)        | 26.4 (50.6)                    | 5 (4, 6)            | 28.4 (33)                      | 1 (1, 1)                  | 18.7 (5.7)                     | 2 (2, 3)            | 18.6 (10.7)                    |
| Wyoming       | 101 (91, 112)        | 58.5                     | 17<br>(16, 19)            | 35.4                     | 12<br>(11, 13)                             | 15.4                     | 6 (5, 7)        | 18.3 (58)                      | 3 (3, 4)            | 15.6 (29)                      | 1 (1, 1)                  | 9.2 (4.7)                      | 2 (1, 2)            | 8.8 (8.3)                      |

UI is the uncertainty interval, it reflects the certainty of an estimate based on data availability, studies size and consistency across data sources  
\*PA: Percentage attributed to overall rate is the proportion of overall age-standardized rate change attributed by each of the following four causes: diabetes, hypertension, glomerulonephritis and other causes

**eTable4:** Years living with disability (YLD) due to CKD in the United States and by state and district in the overall population, and in females and males.

**eTable 4a:** Number and age-standardized rate for overall YLD due to CKD and by cause, with percentage change from 2002 to 2016 for the United States and by state and district.

| Location      | YLD number                 |                          | YLD per 100,000 persons |                          | Age-standardized YLD per 100,000 persons |                          |                  |                                |                     |                                |                           |                                |                     |                                |
|---------------|----------------------------|--------------------------|-------------------------|--------------------------|------------------------------------------|--------------------------|------------------|--------------------------------|---------------------|--------------------------------|---------------------------|--------------------------------|---------------------|--------------------------------|
|               |                            |                          |                         |                          | All causes                               |                          | Due to diabetes  |                                | Due to hypertension |                                | Due to glomerulonephritis |                                | Due to other causes |                                |
|               | 2016 (UI)                  | Percent change from 2002 | 2016 (UI)               | Percent change from 2002 | 2016 (UI)                                | Percent change from 2002 | 2016 (UI)        | Percent change from 2002 (PA*) | 2016 (UI)           | Percent change from 2002 (PA*) | 2016 (UI)                 | Percent change from 2002 (PA*) | 2016 (UI)           | Percent change from 2002 (PA*) |
| United States | 723448<br>(539476, 901307) | 47.8                     | 224<br>(167, 279)       | 31.7                     | 170<br>(127, 212)                        | 17.7                     | 93<br>(69, 118)  | 20.4 (61.8)                    | 30<br>(21, 38)      | 21 (20.1)                      | 20<br>(14, 26)            | 10.6 (7.4)                     | 28<br>(20, 37)      | 11 (10.7)                      |
| Alabama       | 12405<br>(9175, 15605)     | 42.5                     | 255<br>(189, 321)       | 31.4                     | 190<br>(141, 239)                        | 18                       | 104<br>(76, 132) | 21.1 (62.5)                    | 33<br>(23, 43)      | 21 (19.7)                      | 23<br>(16, 30)            | 10.6 (7.4)                     | 31<br>(22, 41)      | 10.7<br>(10.4)                 |
| Alaska        | 1245<br>(932, 1553)        | 63.7                     | 169<br>(127, 211)       | 43.9                     | 159<br>(119, 197)                        | 18.8                     | 87<br>(64, 110)  | 22.4 (63.2)                    | 28<br>(20, 36)      | 20.8<br>(18.9)                 | 18<br>(13, 24)            | 11.6 (7.6)                     | 26<br>(18, 34)      | 11.2<br>(10.3)                 |
| Arizona       | 15414<br>(11426, 19179)    | 76.2                     | 223<br>(165, 278)       | 37.7                     | 165<br>(123, 205)                        | 18.8                     | 90<br>(67, 114)  | 21.6 (61.4)                    | 29<br>(20, 37)      | 21.5<br>(19.4)                 | 19<br>(14, 25)            | 11 (7.3)                       | 27<br>(19, 35)      | 13 (11.8)                      |
| Arkansas      | 7161<br>(5280, 9030)       | 42                       | 241<br>(178, 304)       | 29.2                     | 179<br>(133, 225)                        | 19.4                     | 98<br>(71, 125)  | 22.8 (62.7)                    | 31<br>(22, 41)      | 22.1<br>(19.3)                 | 21<br>(15, 28)            | 11.5 (7.5)                     | 29<br>(20, 39)      | 11.8<br>(10.5)                 |

| Location             | YLD number              |                          | YLD per 100,000 persons |                          | Age-standardized YLD per 100,000 persons |                          |                  |                                |                     |                                |                           |                                |                     |                                |
|----------------------|-------------------------|--------------------------|-------------------------|--------------------------|------------------------------------------|--------------------------|------------------|--------------------------------|---------------------|--------------------------------|---------------------------|--------------------------------|---------------------|--------------------------------|
|                      |                         |                          |                         |                          | All causes                               |                          | Due to diabetes  |                                | Due to hypertension |                                | Due to glomerulonephritis |                                | Due to other causes |                                |
|                      | 2016 (UI)               | Percent change from 2002 | 2016 (UI)               | Percent change from 2002 | 2016 (UI)                                | Percent change from 2002 | 2016 (UI)        | Percent change from 2002 (PA*) | 2016 (UI)           | Percent change from 2002 (PA*) | 2016 (UI)                 | Percent change from 2002 (PA*) | 2016 (UI)           | Percent change from 2002 (PA*) |
| California           | 79894<br>(59378, 99831) | 47.5                     | 202<br>(150, 253)       | 30.7                     | 164<br>(121, 204)                        | 13.3                     | 89<br>(65, 114)  | 15.9 (63.6)                    | 28<br>(20, 37)      | 18.5<br>(22.8)                 | 19<br>(14, 26)            | 6.1 (5.8)                      | 27<br>(20, 36)      | 6 (7.9)                        |
| Colorado             | 10262<br>(7662, 12874)  | 66.5                     | 186<br>(139, 234)       | 35.7                     | 151<br>(112, 190)                        | 16.3                     | 83<br>(61, 105)  | 18.8 (61.8)                    | 26<br>(19, 34)      | 18.6<br>(19.5)                 | 17<br>(13, 23)            | 10.5 (7.8)                     | 24<br>(17, 33)      | 10.3<br>(10.8)                 |
| Connecticut          | 8008<br>(5975, 10029)   | 34                       | 224<br>(167, 280)       | 29                       | 160<br>(120, 200)                        | 17.8                     | 88<br>(65, 112)  | 20.9 (62.5)                    | 28<br>(19, 36)      | 20.5<br>(19.4)                 | 19<br>(13, 25)            | 9.6 (6.8)                      | 26<br>(18, 34)      | 11.8<br>(11.3)                 |
| Delaware             | 2353<br>(1754, 2977)    | 62                       | 247<br>(184, 312)       | 37.1                     | 176<br>(131, 222)                        | 17.5                     | 96<br>(71, 122)  | 20.2 (61.9)                    | 30<br>(21, 40)      | 20.4<br>(19.7)                 | 21<br>(15, 28)            | 11.3 (8)                       | 29<br>(20, 38)      | 10.5<br>(10.4)                 |
| District of Columbia | 1215<br>(909, 1531)     | 21.5                     | 177<br>(133, 223)       | 2.9                      | 157<br>(117, 198)                        | 5.3                      | 86<br>(63, 110)  | 8.3 (63.1)                     | 27<br>(19, 36)      | 10.5 (25)                      | 18<br>(13, 24)            | -3.5 (6.5)                     | 25<br>(18, 34)      | -2.2 (5.4)                     |
| Florida              | 52387<br>(38940, 65904) | 61.8                     | 256<br>(190, 322)       | 31.9                     | 168<br>(126, 212)                        | 20.7                     | 92<br>(68, 117)  | 23.4 (60.8)                    | 29<br>(20, 38)      | 24 (19.6)                      | 20<br>(14, 26)            | 14 (8.4)                       | 27<br>(19, 37)      | 13.5<br>(11.3)                 |
| Georgia              | 22767<br>(16817, 28704) | 62.4                     | 221<br>(164, 279)       | 34.5                     | 183<br>(136, 232)                        | 15.7                     | 100<br>(74, 128) | 18.4 (62.7)                    | 32<br>(22, 42)      | 19 (20.5)                      | 21<br>(15, 29)            | 8.3 (6.6)                      | 30<br>(21, 40)      | 9.3 (10.2)                     |

| Location | YLD number              |                          | YLD per 100,000 persons |                          | Age-standardized YLD per 100,000 persons |                          |                  |                                |                     |                                |                           |                                |                     |                                |
|----------|-------------------------|--------------------------|-------------------------|--------------------------|------------------------------------------|--------------------------|------------------|--------------------------------|---------------------|--------------------------------|---------------------------|--------------------------------|---------------------|--------------------------------|
|          |                         |                          |                         |                          | All causes                               |                          | Due to diabetes  |                                | Due to hypertension |                                | Due to glomerulonephritis |                                | Due to other causes |                                |
|          | 2016 (UI)               | Percent change from 2002 | 2016 (UI)               | Percent change from 2002 | 2016 (UI)                                | Percent change from 2002 | 2016 (UI)        | Percent change from 2002 (PA*) | 2016 (UI)           | Percent change from 2002 (PA*) | 2016 (UI)                 | Percent change from 2002 (PA*) | 2016 (UI)           | Percent change from 2002 (PA*) |
| Hawaii   | 3372<br>(2514, 4261)    | 55.5                     | 234<br>(175, 296)       | 34.6                     | 168<br>(126, 213)                        | 18.7                     | 92<br>(68, 119)  | 21.1 (60.7)                    | 29<br>(21, 38)      | 22.2<br>(20.1)                 | 19<br>(14, 26)            | 11.7 (7.7)                     | 27<br>(20, 36)      | 12.6<br>(11.6)                 |
| Idaho    | 3455<br>(2581, 4313)    | 72.6                     | 206<br>(154, 257)       | 37.7                     | 162<br>(122, 202)                        | 20.7                     | 89<br>(66, 112)  | 23.5 (60.6)                    | 28<br>(20, 37)      | 23.5<br>(19.3)                 | 19<br>(14, 25)            | 14.8 (8.8)                     | 26<br>(18, 35)      | 13.6<br>(11.3)                 |
| Illinois | 28139<br>(20787, 35543) | 31.2                     | 219<br>(162, 277)       | 28.1                     | 168<br>(124, 211)                        | 13.5                     | 92<br>(68, 117)  | 16.1 (63.6)                    | 29<br>(21, 39)      | 17.7<br>(22.2)                 | 19<br>(14, 26)            | 6.2 (5.7)                      | 27<br>(20, 36)      | 6.7 (8.5)                      |
| Indiana  | 15491<br>(11599, 19429) | 41.3                     | 234<br>(175, 293)       | 31.2                     | 180<br>(135, 227)                        | 18.5                     | 98<br>(72, 125)  | 21.4 (61.5)                    | 31<br>(22, 41)      | 20.7<br>(19.1)                 | 21<br>(15, 28)            | 12.2 (8.1)                     | 29<br>(21, 39)      | 12.1<br>(11.2)                 |
| Iowa     | 6936<br>(5176, 8662)    | 35.4                     | 221<br>(165, 277)       | 26.6                     | 161<br>(120, 202)                        | 20                       | 88<br>(65, 112)  | 22.5 (60.4)                    | 28<br>(20, 36)      | 23.1<br>(19.6)                 | 19<br>(13, 25)            | 14.5 (8.8)                     | 26<br>(19, 35)      | 12.9<br>(11.1)                 |
| Kansas   | 6464<br>(4860, 8036)    | 36.6                     | 222<br>(167, 276)       | 27.4                     | 171<br>(129, 214)                        | 18.5                     | 94<br>(70, 119)  | 21.4 (61.8)                    | 30<br>(21, 39)      | 21.4<br>(19.7)                 | 20<br>(14, 27)            | 11.1 (7.4)                     | 28<br>(20, 36)      | 11.9<br>(11.1)                 |
| Kentucky | 10742<br>(7941, 13398)  | 43.9                     | 243<br>(179, 303)       | 32.9                     | 183<br>(137, 228)                        | 19                       | 100<br>(74, 126) | 22.2 (62.1)                    | 32<br>(23, 41)      | 21.1 (19)                      | 21<br>(15, 29)            | 11.6 (7.7)                     | 30<br>(21, 40)      | 12.3<br>(11.2)                 |

| Location      | YLD number              |                          | YLD per 100,000 persons |                          | Age-standardized YLD per 100,000 persons |                          |                  |                                |                     |                                |                           |                                |                     |                                |
|---------------|-------------------------|--------------------------|-------------------------|--------------------------|------------------------------------------|--------------------------|------------------|--------------------------------|---------------------|--------------------------------|---------------------------|--------------------------------|---------------------|--------------------------------|
|               |                         |                          |                         |                          | All causes                               |                          | Due to diabetes  |                                | Due to hypertension |                                | Due to glomerulonephritis |                                | Due to other causes |                                |
|               | 2016 (UI)               | Percent change from 2002 | 2016 (UI)               | Percent change from 2002 | 2016 (UI)                                | Percent change from 2002 | 2016 (UI)        | Percent change from 2002 (PA*) | 2016 (UI)           | Percent change from 2002 (PA*) | 2016 (UI)                 | Percent change from 2002 (PA*) | 2016 (UI)           | Percent change from 2002 (PA*) |
| Louisiana     | 11311<br>(8372, 14323)  | 37.5                     | 242<br>(179, 306)       | 32.2                     | 192<br>(142, 245)                        | 18.3                     | 105<br>(78, 134) | 21.1 (61.6)                    | 33<br>(24, 44)      | 21.2<br>(19.6)                 | 23<br>(16, 30)            | 11.6 (7.9)                     | 31<br>(22, 42)      | 11.6<br>(10.9)                 |
| Maine         | 3386<br>(2526, 4273)    | 41.4                     | 255<br>(190, 322)       | 37.6                     | 165<br>(123, 209)                        | 17.2                     | 90<br>(67, 116)  | 19.5 (60.7)                    | 29<br>(20, 37)      | 19.7<br>(19.5)                 | 19<br>(14, 26)            | 10.5 (7.6)                     | 27<br>(19, 35)      | 12.4<br>(12.2)                 |
| Maryland      | 13187<br>(9722, 16632)  | 44.9                     | 219<br>(161, 276)       | 30.5                     | 168<br>(124, 212)                        | 15.4                     | 92<br>(68, 119)  | 17.9 (62.4)                    | 29<br>(21, 38)      | 19.7<br>(21.4)                 | 20<br>(14, 26)            | 7.3 (5.9)                      | 27<br>(20, 36)      | 9.3 (10.3)                     |
| Massachusetts | 14950<br>(11053, 18898) | 35.9                     | 219<br>(162, 277)       | 27.5                     | 159<br>(118, 200)                        | 16.2                     | 88<br>(65, 112)  | 19.2 (63.6)                    | 28<br>(20, 37)      | 19.8<br>(20.8)                 | 18<br>(13, 24)            | 8.5 (6.4)                      | 26<br>(18, 34)      | 8.7 (9.2)                      |
| Michigan      | 23532<br>(17619, 29418) | 35.1                     | 237<br>(178, 297)       | 36.3                     | 172<br>(129, 216)                        | 16.9                     | 94<br>(70, 121)  | 19.7 (62.4)                    | 30<br>(22, 39)      | 19.4<br>(19.5)                 | 20<br>(15, 27)            | 9.1 (6.7)                      | 28<br>(20, 37)      | 11.3<br>(11.4)                 |
| Minnesota     | 11695<br>(8727, 14738)  | 44.5                     | 212<br>(158, 268)       | 31.4                     | 160<br>(119, 202)                        | 16.7                     | 87<br>(64, 112)  | 19.4 (62.3)                    | 28<br>(20, 37)      | 19.5 (20)                      | 19<br>(13, 25)            | 9.7 (7.2)                      | 26<br>(18, 35)      | 10.2<br>(10.5)                 |
| Mississippi   | 7572<br>(5609, 9506)    | 39.2                     | 253<br>(188, 318)       | 33.2                     | 198<br>(147, 249)                        | 18.6                     | 108<br>(80, 139) | 21.6 (62.1)                    | 34<br>(24, 44)      | 22.2<br>(19.9)                 | 23<br>(16, 30)            | 10.9 (7.4)                     | 32<br>(23, 43)      | 11.4<br>(10.6)                 |

| Location      | YLD number              |                          | YLD per 100,000 persons |                          | Age-standardized YLD per 100,000 persons |                          |                 |                                |                     |                                |                           |                                |                     |                                |
|---------------|-------------------------|--------------------------|-------------------------|--------------------------|------------------------------------------|--------------------------|-----------------|--------------------------------|---------------------|--------------------------------|---------------------------|--------------------------------|---------------------|--------------------------------|
|               |                         |                          |                         |                          | All causes                               |                          | Due to diabetes |                                | Due to hypertension |                                | Due to glomerulonephritis |                                | Due to other causes |                                |
|               | 2016 (UI)               | Percent change from 2002 | 2016 (UI)               | Percent change from 2002 | 2016 (UI)                                | Percent change from 2002 | 2016 (UI)       | Percent change from 2002 (PA*) | 2016 (UI)           | Percent change from 2002 (PA*) | 2016 (UI)                 | Percent change from 2002 (PA*) | 2016 (UI)           | Percent change from 2002 (PA*) |
| Missouri      | 14337<br>(10618, 17967) | 42.5                     | 236<br>(175, 295)       | 32.8                     | 174<br>(129, 218)                        | 20.3                     | 95<br>(70, 121) | 23.6 (62)                      | 30<br>(21, 39)      | 22.5<br>(18.9)                 | 20<br>(14, 27)            | 12.6 (7.7)                     | 28<br>(20, 37)      | 13.4<br>(11.4)                 |
| Montana       | 2238<br>(1691, 2811)    | 50.2                     | 216<br>(163, 271)       | 31.9                     | 152<br>(115, 191)                        | 17                       | 83<br>(61, 106) | 19.9 (62.6)                    | 26<br>(19, 34)      | 19 (19.1)                      | 18<br>(13, 23)            | 9.6 (7)                        | 25<br>(18, 33)      | 11.1<br>(11.3)                 |
| Nebraska      | 4169<br>(3132, 5201)    | 39.8                     | 219<br>(164, 273)       | 26.8                     | 168<br>(126, 210)                        | 19.7                     | 92<br>(68, 118) | 22.6 (61.2)                    | 29<br>(21, 38)      | 22.2<br>(19.3)                 | 20<br>(14, 26)            | 13.2 (8.3)                     | 27<br>(20, 37)      | 12.8<br>(11.3)                 |
| Nevada        | 6448<br>(4823, 8139)    | 81.4                     | 220<br>(165, 278)       | 34.1                     | 171<br>(127, 215)                        | 16.3                     | 94<br>(69, 120) | 18.8 (62)                      | 30<br>(21, 39)      | 19 (19.9)                      | 20<br>(14, 27)            | 10.4 (7.8)                     | 28<br>(20, 36)      | 9.7 (10.3)                     |
| New Hampshire | 3034<br>(2265, 3820)    | 48.7                     | 227<br>(170, 286)       | 40.8                     | 157<br>(117, 198)                        | 16.3                     | 86<br>(62, 109) | 18.7 (61.1)                    | 27<br>(19, 35)      | 19.4<br>(20.1)                 | 18<br>(13, 25)            | 11.8 (8.8)                     | 26<br>(18, 34)      | 9.4 (10)                       |
| New Jersey    | 20173<br>(14957, 25386) | 34                       | 225<br>(167, 283)       | 27.6                     | 166<br>(123, 209)                        | 15.8                     | 91<br>(67, 117) | 18.4 (62.5)                    | 29<br>(21, 38)      | 19.3<br>(20.7)                 | 19<br>(14, 26)            | 9.5 (7.4)                      | 27<br>(19, 35)      | 8.7 (9.5)                      |
| New Mexico    | 4766<br>(3580, 5968)    | 58.9                     | 230<br>(173, 288)       | 42.4                     | 171<br>(129, 214)                        | 20.8                     | 94<br>(69, 120) | 23.4 (60.1)                    | 30<br>(21, 39)      | 23.3<br>(19.1)                 | 20<br>(14, 27)            | 14.5 (8.6)                     | 28<br>(20, 37)      | 15 (12.3)                      |

| Location       | YLD number              |                          | YLD per 100,000 persons |                          | Age-standardized YLD per 100,000 persons |                          |                 |                                |                     |                                |                           |                                |                     |                                |
|----------------|-------------------------|--------------------------|-------------------------|--------------------------|------------------------------------------|--------------------------|-----------------|--------------------------------|---------------------|--------------------------------|---------------------------|--------------------------------|---------------------|--------------------------------|
|                |                         |                          |                         |                          | All causes                               |                          | Due to diabetes |                                | Due to hypertension |                                | Due to glomerulonephritis |                                | Due to other causes |                                |
|                | 2016 (UI)               | Percent change from 2002 | 2016 (UI)               | Percent change from 2002 | 2016 (UI)                                | Percent change from 2002 | 2016 (UI)       | Percent change from 2002 (PA*) | 2016 (UI)           | Percent change from 2002 (PA*) | 2016 (UI)                 | Percent change from 2002 (PA*) | 2016 (UI)           | Percent change from 2002 (PA*) |
| New York       | 43766<br>(32637, 55430) | 36                       | 221<br>(165, 280)       | 31.5                     | 165<br>(123, 210)                        | 19.1                     | 90<br>(66, 116) | 21.6 (60.5)                    | 29<br>(20, 37)      | 22.1<br>(19.5)                 | 19<br>(14, 26)            | 12.4 (8.1)                     | 27<br>(19, 36)      | 13.3<br>(11.9)                 |
| North Carolina | 24086<br>(18052, 30206) | 63.6                     | 238<br>(179, 299)       | 34.9                     | 180<br>(134, 227)                        | 18.7                     | 99<br>(73, 126) | 21.1 (60.8)                    | 31<br>(22, 41)      | 21.5<br>(19.6)                 | 21<br>(15, 28)            | 13.7 (8.8)                     | 29<br>(21, 39)      | 11.7<br>(10.8)                 |
| North Dakota   | 1605<br>(1197, 2003)    | 40.9                     | 208<br>(155, 260)       | 16.7                     | 165<br>(123, 206)                        | 19.6                     | 90<br>(67, 115) | 22.3 (61)                      | 29<br>(20, 37)      | 21.5<br>(18.6)                 | 19<br>(14, 26)            | 13.4 (8.4)                     | 27<br>(19, 36)      | 13.6<br>(11.9)                 |
| Ohio           | 28167<br>(20993, 35445) | 34.8                     | 243<br>(181, 305)       | 32.4                     | 177<br>(131, 223)                        | 18.1                     | 97<br>(71, 123) | 21 (62)                        | 31<br>(22, 40)      | 21.2<br>(19.8)                 | 21<br>(15, 28)            | 10.6 (7.3)                     | 29<br>(20, 38)      | 11.4<br>(10.9)                 |
| Oklahoma       | 8715<br>(6538, 10942)   | 44.5                     | 223<br>(167, 280)       | 28.9                     | 174<br>(132, 219)                        | 21.3                     | 95<br>(71, 121) | 24.4 (61)                      | 30<br>(21, 39)      | 23.9 (19)                      | 21<br>(15, 27)            | 14 (8.2)                       | 28<br>(20, 38)      | 14.4<br>(11.8)                 |
| Oregon         | 8782<br>(6579, 10987)   | 55.6                     | 217<br>(163, 272)       | 35                       | 156<br>(116, 195)                        | 18.8                     | 85<br>(63, 108) | 21.1 (60.3)                    | 27<br>(20, 36)      | 21.7<br>(19.8)                 | 18<br>(13, 24)            | 14.1 (9.1)                     | 25<br>(18, 33)      | 11.8<br>(10.8)                 |
| Pennsylvania   | 31091<br>(23018, 39196) | 28.7                     | 244<br>(180, 307)       | 24.1                     | 169<br>(125, 214)                        | 15.1                     | 92<br>(68, 118) | 17.5 (61.9)                    | 29<br>(21, 39)      | 18.2<br>(20.4)                 | 20<br>(14, 26)            | 8.7 (7.1)                      | 27<br>(19, 36)      | 9.3 (10.5)                     |

| Location       | YLD number              |                          | YLD per 100,000 persons |                          | Age-standardized YLD per 100,000 persons |                          |                  |                                |                     |                                |                           |                                |                     |                                |
|----------------|-------------------------|--------------------------|-------------------------|--------------------------|------------------------------------------|--------------------------|------------------|--------------------------------|---------------------|--------------------------------|---------------------------|--------------------------------|---------------------|--------------------------------|
|                |                         |                          |                         |                          | All causes                               |                          | Due to diabetes  |                                | Due to hypertension |                                | Due to glomerulonephritis |                                | Due to other causes |                                |
|                | 2016 (UI)               | Percent change from 2002 | 2016 (UI)               | Percent change from 2002 | 2016 (UI)                                | Percent change from 2002 | 2016 (UI)        | Percent change from 2002 (PA*) | 2016 (UI)           | Percent change from 2002 (PA*) | 2016 (UI)                 | Percent change from 2002 (PA*) | 2016 (UI)           | Percent change from 2002 (PA*) |
| Rhode Island   | 2359<br>(1760, 2944)    | 26.6                     | 223<br>(167, 279)       | 27.5                     | 159<br>(118, 199)                        | 16.5                     | 87<br>(64, 110)  | 19.3 (62.3)                    | 28<br>(20, 36)      | 18.4 (19)                      | 19<br>(13, 25)            | 10.2 (7.7)                     | 26<br>(19, 35)      | 10.6 (11)                      |
| South Carolina | 12263<br>(9115, 15543)  | 65.2                     | 249<br>(185, 315)       | 37.4                     | 183<br>(136, 231)                        | 18.1                     | 100<br>(74, 128) | 20.9 (61.6)                    | 32<br>(23, 42)      | 22.1<br>(20.6)                 | 21<br>(15, 28)            | 11.1 (7.6)                     | 30<br>(21, 39)      | 10.8<br>(10.2)                 |
| South Dakota   | 1874<br>(1406, 2359)    | 45                       | 217<br>(162, 273)       | 27.5                     | 160<br>(120, 203)                        | 18.8                     | 88<br>(65, 112)  | 21.4 (61)                      | 28<br>(20, 36)      | 22 (19.9)                      | 19<br>(13, 25)            | 11.1 (7.4)                     | 26<br>(19, 35)      | 12.8<br>(11.7)                 |
| Tennessee      | 15513<br>(11554, 19573) | 52.4                     | 234<br>(174, 295)       | 33.3                     | 176<br>(132, 221)                        | 19                       | 96<br>(71, 124)  | 22.5 (62.8)                    | 31<br>(22, 40)      | 21.9<br>(19.5)                 | 21<br>(15, 27)            | 10.7 (7.1)                     | 29<br>(21, 38)      | 11.6<br>(10.6)                 |
| Texas          | 57200<br>(42901, 71101) | 74.6                     | 205<br>(154, 255)       | 36.3                     | 179<br>(134, 223)                        | 22.2                     | 98<br>(72, 125)  | 24.9 (60)                      | 31<br>(22, 41)      | 26 (19.8)                      | 21<br>(15, 28)            | 14.9 (8.3)                     | 29<br>(21, 38)      | 15.4<br>(11.9)                 |
| Utah           | 5163<br>(3888, 6495)    | 73.1                     | 171<br>(128, 215)       | 33.8                     | 167<br>(125, 210)                        | 17.8                     | 91<br>(68, 116)  | 20.2 (60.6)                    | 29<br>(21, 38)      | 21.2<br>(20.3)                 | 19<br>(14, 25)            | 11.5 (7.9)                     | 27<br>(19, 36)      | 11.6<br>(11.2)                 |
| Vermont        | 1410<br>(1057, 1785)    | 39.2                     | 226<br>(169, 286)       | 36.8                     | 153<br>(115, 193)                        | 15.6                     | 84<br>(61, 108)  | 18.6 (63.5)                    | 27<br>(19, 34)      | 18 (19.5)                      | 18<br>(13, 24)            | 9.2 (7.3)                      | 25<br>(18, 33)      | 8.7 (9.7)                      |



| Location      | YLD number              |                          | YLD per 100,000 persons |                          | Age-standardized YLD per 100,000 persons |                          |                  |                                |                     |                                |                           |                                |                     |                                |
|---------------|-------------------------|--------------------------|-------------------------|--------------------------|------------------------------------------|--------------------------|------------------|--------------------------------|---------------------|--------------------------------|---------------------------|--------------------------------|---------------------|--------------------------------|
|               |                         |                          |                         |                          | All causes                               |                          | Due to diabetes  |                                | Due to hypertension |                                | Due to glomerulonephritis |                                | Due to other causes |                                |
|               | 2016 (UI)               | Percent change from 2002 | 2016 (UI)               | Percent change from 2002 | 2016 (UI)                                | Percent change from 2002 | 2016 (UI)        | Percent change from 2002 (PA*) | 2016 (UI)           | Percent change from 2002 (PA*) | 2016 (UI)                 | Percent change from 2002 (PA*) | 2016 (UI)           | Percent change from 2002 (PA*) |
| Virginia      | 18885<br>(13962, 23775) | 53.2                     | 224<br>(166, 282)       | 32.5                     | 174<br>(129, 219)                        | 17.5                     | 95<br>(69, 121)  | 20.1 (61.6)                    | 30<br>(22, 40)      | 19.7<br>(19.2)                 | 20<br>(15, 27)            | 11.2 (7.9)                     | 28<br>(20, 37)      | 11.6<br>(11.3)                 |
| Washington    | 14631<br>(10953, 18580) | 63.7                     | 203<br>(152, 258)       | 37.1                     | 156<br>(117, 199)                        | 20.8                     | 85<br>(63, 109)  | 23.6 (60.6)                    | 27<br>(19, 35)      | 24.2<br>(19.7)                 | 18<br>(13, 24)            | 13 (7.8)                       | 25<br>(18, 34)      | 14.5<br>(11.9)                 |
| West Virginia | 5101<br>(3829, 6381)    | 35                       | 279<br>(209, 348)       | 33                       | 190<br>(142, 238)                        | 21.7                     | 104<br>(77, 131) | 25 (61.1)                      | 33<br>(23, 43)      | 23.7<br>(18.6)                 | 23<br>(16, 30)            | 14.8 (8.6)                     | 31<br>(22, 42)      | 14.6<br>(11.7)                 |
| Wisconsin     | 13188<br>(9856, 16428)  | 41.1                     | 229<br>(171, 285)       | 32.8                     | 165<br>(123, 207)                        | 17.7                     | 91<br>(67, 115)  | 20.8 (62.6)                    | 29<br>(20, 38)      | 20.5<br>(19.8)                 | 19<br>(14, 25)            | 9.8 (6.8)                      | 27<br>(19, 36)      | 11.1<br>(10.8)                 |
| Wyoming       | 1138<br>(856, 1421)     | 50.4                     | 195<br>(146, 243)       | 28.5                     | 151<br>(114, 189)                        | 17.1                     | 83<br>(61, 105)  | 19.5 (61.2)                    | 26<br>(19, 34)      | 20 (19.8)                      | 18<br>(13, 23)            | 10.4 (7.5)                     | 25<br>(18, 33)      | 11.5<br>(11.5)                 |

YLD: Years Lost due to Disability

UI is the uncertainty interval, it reflects the certainty of an estimate based on data availability, studies size and consistency across data sources

\*Percentage attributed to overall rate is the proportion of overall age-standardized rate change attributed by each of the following four causes: diabetes, hypertension, glomerulonephritis and other causes

**eTable 4b:** Number and age-standardized rate for overall YLD due to CKD and by cause in females, with percentage change from 2002 to 2016 for the United States and by state and district.

| Location      | YLD number                 |                          | YLD per 100,000 persons |                          | Age-standardized YLD per 100,000 persons |                          |                  |                                |                     |                                |                           |                                |                     |                                |
|---------------|----------------------------|--------------------------|-------------------------|--------------------------|------------------------------------------|--------------------------|------------------|--------------------------------|---------------------|--------------------------------|---------------------------|--------------------------------|---------------------|--------------------------------|
|               |                            |                          |                         |                          | All causes                               |                          | Due to diabetes  |                                | Due to hypertension |                                | Due to glomerulonephritis |                                | Due to other causes |                                |
|               | 2016 (UI)                  | Percent change from 2002 | 2016 (UI)               | Percent change from 2002 | 2016 (UI)                                | Percent change from 2002 | 2016 (UI)        | Percent change from 2002 (PA*) | 2016 (UI)           | Percent change from 2002 (PA*) | 2016 (UI)                 | Percent change from 2002 (PA*) | 2016 (UI)           | Percent change from 2002 (PA*) |
| United States | 388224<br>(292199, 483021) | 41.4                     | 237<br>(178, 295)       | 26.3                     | 171<br>(129, 212)                        | 16.3                     | 90<br>(67, 115)  | 18.8<br>(59.6)                 | 30<br>(21, 39)      | 19.6<br>(20.5)                 | 22 (16, 29)               | 9.9 (8.3)                      | 29<br>(20, 38)      | 10.7<br>(11.5)                 |
| Alabama       | 6861<br>(5079, 8603)       | 37.1                     | 274<br>(202, 343)       | 26.5                     | 194<br>(144, 243)                        | 17.4                     | 102<br>(75, 132) | 20.6<br>(60.8)                 | 34<br>(23, 45)      | 20.5<br>(20.1)                 | 25 (18, 34)               | 9.2 (7.4)                      | 33<br>(23, 44)      | 11.5<br>(11.7)                 |
| Alaska        | 610 (455, 769)             | 54.7                     | 176<br>(131, 221)       | 38.6                     | 159<br>(119, 201)                        | 15.9                     | 84<br>(62, 107)  | 19.2<br>(62)                   | 28<br>(20, 37)      | 18 (19.6)                      | 21 (14, 28)               | 9.1 (7.9)                      | 27<br>(18, 36)      | 9.3<br>(10.5)                  |
| Arizona       | 8117<br>(6072, 10088)      | 71                       | 233<br>(175, 290)       | 32.9                     | 166<br>(124, 208)                        | 18                       | 87<br>(64, 112)  | 20.2<br>(58.2)                 | 29<br>(21, 38)      | 20.6<br>(19.8)                 | 21 (15, 28)               | 12 (9.1)                       | 28<br>(19, 37)      | 13.3<br>(12.9)                 |
| Arkansas      | 3877<br>(2857, 4911)       | 35.9                     | 256<br>(189, 325)       | 24.2                     | 182<br>(135, 229)                        | 18.4                     | 96<br>(70, 124)  | 21.7<br>(60.5)                 | 32<br>(22, 42)      | 20.7<br>(19.3)                 | 23 (17, 32)               | 11.6 (8.6)                     | 30<br>(21, 41)      | 12.1<br>(11.6)                 |
| California    | 42301<br>(31756, 52787)    | 41                       | 213<br>(160, 266)       | 24.5                     | 164<br>(123, 205)                        | 10.6                     | 86<br>(64, 110)  | 12.7<br>(61.9)                 | 28<br>(20, 37)      | 15.8<br>(24.6)                 | 22 (15, 29)               | 3.8 (5.1)                      | 28<br>(20, 37)      | 5.1 (8.4)                      |

| Location             | YLD number              |                          | YLD per 100,000 persons |                          | Age-standardized YLD per 100,000 persons |                          |                 |                                |                     |                                |                           |                                |                     |                                |
|----------------------|-------------------------|--------------------------|-------------------------|--------------------------|------------------------------------------|--------------------------|-----------------|--------------------------------|---------------------|--------------------------------|---------------------------|--------------------------------|---------------------|--------------------------------|
|                      |                         |                          |                         |                          | All causes                               |                          | Due to diabetes |                                | Due to hypertension |                                | Due to glomerulonephritis |                                | Due to other causes |                                |
|                      | 2016 (UI)               | Percent change from 2002 | 2016 (UI)               | Percent change from 2002 | 2016 (UI)                                | Percent change from 2002 | 2016 (UI)       | Percent change from 2002 (PA*) | 2016 (UI)           | Percent change from 2002 (PA*) | 2016 (UI)                 | Percent change from 2002 (PA*) | 2016 (UI)           | Percent change from 2002 (PA*) |
| Colorado             | 5326<br>(4001, 6681)    | 59.3                     | 194<br>(146, 244)       | 29.5                     | 150<br>(113, 189)                        | 14.7                     | 79<br>(59, 102) | 16.6<br>(58.6)                 | 26<br>(18, 34)      | 16.7<br>(19.7)                 | 19 (13, 26)               | 10.7 (9.7)                     | 25<br>(18, 34)      | 10.2<br>(12.1)                 |
| Connecticut          | 4318<br>(3238, 5410)    | 27.5                     | 236<br>(177, 295)       | 23.4                     | 159<br>(118, 200)                        | 16                       | 84<br>(61, 107) | 18.7<br>(60.2)                 | 28<br>(19, 36)      | 18.8<br>(20.1)                 | 21 (15, 28)               | 9.1 (7.8)                      | 27<br>(19, 36)      | 10.8<br>(11.9)                 |
| Delaware             | 1276<br>(954, 1613)     | 57.6                     | 260<br>(194, 329)       | 33                       | 177<br>(132, 225)                        | 17.1                     | 93<br>(69, 119) | 19.7<br>(59.3)                 | 31<br>(22, 41)      | 20.6<br>(20.5)                 | 23 (16, 31)               | 11.3 (9)                       | 30<br>(21, 40)      | 10.8<br>(11.2)                 |
| District of Columbia | 682 (511, 864)          | 17.3                     | 190<br>(142, 240)       | 0                        | 159<br>(118, 200)                        | 5.1                      | 84<br>(62, 108) | 8 (62.4)                       | 28<br>(20, 37)      | 10.2<br>(25.8)                 | 20 (14, 28)               | -3.5 (7.5)                     | 26<br>(18, 36)      | -1.6 (4.3)                     |
| Florida              | 27913<br>(20921, 34836) | 56.6                     | 267<br>(200, 333)       | 27.9                     | 168<br>(126, 211)                        | 20                       | 89<br>(66, 114) | 22.6<br>(58.6)                 | 29<br>(20, 38)      | 22.5<br>(19.2)                 | 22 (15, 29)               | 14 (9.5)                       | 28<br>(20, 38)      | 14.3<br>(12.6)                 |
| Georgia              | 12497<br>(9257, 15811)  | 56.5                     | 237<br>(176, 300)       | 28.5                     | 186<br>(138, 235)                        | 14.3                     | 98<br>(73, 126) | 16.8<br>(61)                   | 33<br>(23, 44)      | 17.7<br>(21.2)                 | 24 (16, 32)               | 6.7 (6.5)                      | 31<br>(21, 42)      | 9.3<br>(11.3)                  |
| Hawaii               | 1778<br>(1324, 2262)    | 52.6                     | 251<br>(187, 319)       | 33.2                     | 168<br>(125, 214)                        | 16.8                     | 88<br>(66, 115) | 18.9<br>(58.5)                 | 29<br>(21, 39)      | 20.4<br>(20.7)                 | 22 (15, 29)               | 10.5 (8.5)                     | 28<br>(20, 38)      | 11.8<br>(12.3)                 |

| Location  | YLD number              |                          | YLD per 100,000 persons |                          | Age-standardized YLD per 100,000 persons |                          |                  |                                |                     |                                |                           |                                |                     |                                |
|-----------|-------------------------|--------------------------|-------------------------|--------------------------|------------------------------------------|--------------------------|------------------|--------------------------------|---------------------|--------------------------------|---------------------------|--------------------------------|---------------------|--------------------------------|
|           |                         |                          |                         |                          | All causes                               |                          | Due to diabetes  |                                | Due to hypertension |                                | Due to glomerulonephritis |                                | Due to other causes |                                |
|           | 2016 (UI)               | Percent change from 2002 | 2016 (UI)               | Percent change from 2002 | 2016 (UI)                                | Percent change from 2002 | 2016 (UI)        | Percent change from 2002 (PA*) | 2016 (UI)           | Percent change from 2002 (PA*) | 2016 (UI)                 | Percent change from 2002 (PA*) | 2016 (UI)           | Percent change from 2002 (PA*) |
| Idaho     | 1788<br>(1329, 2224)    | 66.8                     | 214<br>(159, 266)       | 33.2                     | 163<br>(121, 203)                        | 20.5                     | 86<br>(63, 109)  | 23.1<br>(58.3)                 | 29<br>(20, 38)      | 22.8<br>(19.3)                 | 21 (15, 28)               | 15.2 (10)                      | 27<br>(19, 37)      | 14.4<br>(12.5)                 |
| Illinois  | 15120<br>(11262, 19074) | 25                       | 231<br>(172, 292)       | 22.3                     | 167<br>(125, 211)                        | 12                       | 88<br>(65, 112)  | 14.4<br>(61.8)                 | 30<br>(21, 39)      | 16.2<br>(23.1)                 | 21 (15, 29)               | 4.5 (5.2)                      | 28<br>(20, 37)      | 6.9 (10)                       |
| Indiana   | 8368<br>(6196, 10442)   | 34.2                     | 249<br>(184, 311)       | 24.9                     | 181<br>(135, 227)                        | 16.7                     | 95<br>(71, 122)  | 19<br>(58.8)                   | 32<br>(22, 43)      | 20 (20.4)                      | 23 (16, 31)               | 10.9 (8.8)                     | 30<br>(21, 40)      | 11.4<br>(11.9)                 |
| Iowa      | 3718<br>(2757, 4637)    | 27.8                     | 236<br>(175, 294)       | 20.8                     | 161<br>(119, 202)                        | 18.6                     | 85<br>(62, 109)  | 19.9<br>(55.8)                 | 28<br>(20, 37)      | 21.5 (20)                      | 21 (14, 28)               | 15.7<br>(11.1)                 | 27<br>(18, 36)      | 14 (13.1)                      |
| Kansas    | 3441<br>(2603, 4353)    | 29                       | 236<br>(179, 299)       | 21.3                     | 171<br>(128, 217)                        | 16.6                     | 90<br>(68, 116)  | 19.7<br>(61)                   | 30<br>(21, 40)      | 19.5<br>(20.2)                 | 22 (15, 30)               | 8.4 (7)                        | 29<br>(20, 39)      | 11.2<br>(11.8)                 |
| Kentucky  | 5801<br>(4308, 7282)    | 37.6                     | 258<br>(192, 324)       | 27.8                     | 184<br>(137, 233)                        | 18.2                     | 97<br>(71, 125)  | 21.1<br>(59.7)                 | 32<br>(23, 42)      | 20.7<br>(19.6)                 | 24 (17, 32)               | 11.7 (8.8)                     | 31<br>(22, 41)      | 12.2<br>(11.9)                 |
| Louisiana | 6228<br>(4621, 7945)    | 32.6                     | 260<br>(193, 332)       | 28.5                     | 197<br>(147, 250)                        | 18.6                     | 104<br>(77, 135) | 21.1<br>(59)                   | 34<br>(24, 45)      | 21.6<br>(19.8)                 | 25 (18, 34)               | 12.7 (9.3)                     | 33<br>(23, 45)      | 12.6<br>(11.9)                 |

| Location      | YLD number             |                          | YLD per 100,000 persons |                          | Age-standardized YLD per 100,000 persons |                          |                  |                                |                     |                                |                           |                                |                     |                                |
|---------------|------------------------|--------------------------|-------------------------|--------------------------|------------------------------------------|--------------------------|------------------|--------------------------------|---------------------|--------------------------------|---------------------------|--------------------------------|---------------------|--------------------------------|
|               |                        |                          |                         |                          | All causes                               |                          | Due to diabetes  |                                | Due to hypertension |                                | Due to glomerulonephritis |                                | Due to other causes |                                |
|               | 2016 (UI)              | Percent change from 2002 | 2016 (UI)               | Percent change from 2002 | 2016 (UI)                                | Percent change from 2002 | 2016 (UI)        | Percent change from 2002 (PA*) | 2016 (UI)           | Percent change from 2002 (PA*) | 2016 (UI)                 | Percent change from 2002 (PA*) | 2016 (UI)           | Percent change from 2002 (PA*) |
| Maine         | 1804<br>(1342, 2281)   | 33.5                     | 266<br>(198, 337)       | 30.5                     | 165<br>(123, 210)                        | 15.3                     | 87<br>(64, 112)  | 17.2<br>(58.3)                 | 29<br>(20, 38)      | 18.1<br>(20.2)                 | 21 (15, 29)               | 10.1 (9)                       | 28<br>(20, 37)      | 11 (12.5)                      |
| Maryland      | 7168<br>(5245, 9104)   | 40.9                     | 231<br>(169, 293)       | 27.4                     | 167<br>(123, 212)                        | 15                       | 89<br>(65, 114)  | 17.5<br>(60.5)                 | 29<br>(20, 39)      | 18.4<br>(20.8)                 | 22 (15, 29)               | 8.2 (7.5)                      | 28<br>(19, 37)      | 9.6<br>(11.2)                  |
| Massachusetts | 7847<br>(5773, 9983)   | 28.2                     | 223<br>(164, 284)       | 20.9                     | 153<br>(113, 193)                        | 13.7                     | 81<br>(60, 104)  | 17<br>(63.6)                   | 27<br>(19, 36)      | 17.6 (22)                      | 19 (13, 26)               | 6.2 (6.1)                      | 25<br>(18, 35)      | 6.4 (8.2)                      |
| Michigan      | 12601<br>(9437, 15775) | 28.9                     | 250<br>(187, 313)       | 30.2                     | 172<br>(128, 218)                        | 15.1                     | 91<br>(67, 117)  | 17.5<br>(60.2)                 | 30<br>(22, 40)      | 17.1<br>(19.5)                 | 22 (16, 30)               | 7.5 (6.8)                      | 29<br>(20, 39)      | 11.8<br>(13.5)                 |
| Minnesota     | 6154<br>(4597, 7791)   | 37.2                     | 222<br>(166, 281)       | 25.2                     | 159<br>(118, 201)                        | 15                       | 83<br>(62, 108)  | 18<br>(61.4)                   | 28<br>(20, 37)      | 18.8<br>(21.6)                 | 20 (15, 28)               | 7.8 (7.1)                      | 27<br>(19, 36)      | 8.4 (9.9)                      |
| Mississippi   | 4243<br>(3152, 5381)   | 34                       | 275<br>(205, 349)       | 28.3                     | 204<br>(152, 259)                        | 17.8                     | 108<br>(79, 140) | 20.7<br>(60.3)                 | 35<br>(25, 47)      | 21.5<br>(20.3)                 | 27 (18, 35)               | 9.8 (7.7)                      | 34<br>(24, 47)      | 11.8<br>(11.8)                 |
| Missouri      | 7749<br>(5729, 9730)   | 36.4                     | 250<br>(185, 314)       | 27.9                     | 174<br>(129, 221)                        | 19.8                     | 92<br>(68, 119)  | 23.3<br>(60.5)                 | 31<br>(22, 40)      | 21.6<br>(18.9)                 | 22 (16, 30)               | 11.9 (8.2)                     | 29<br>(21, 39)      | 14 (12.4)                      |

| Location      | YLD number              |                          | YLD per 100,000 persons |                          | Age-standardized YLD per 100,000 persons |                          |                 |                                |                     |                                |                           |                                |                     |                                |
|---------------|-------------------------|--------------------------|-------------------------|--------------------------|------------------------------------------|--------------------------|-----------------|--------------------------------|---------------------|--------------------------------|---------------------------|--------------------------------|---------------------|--------------------------------|
|               |                         |                          |                         |                          | All causes                               |                          | Due to diabetes |                                | Due to hypertension |                                | Due to glomerulonephritis |                                | Due to other causes |                                |
|               | 2016 (UI)               | Percent change from 2002 | 2016 (UI)               | Percent change from 2002 | 2016 (UI)                                | Percent change from 2002 | 2016 (UI)       | Percent change from 2002 (PA*) | 2016 (UI)           | Percent change from 2002 (PA*) | 2016 (UI)                 | Percent change from 2002 (PA*) | 2016 (UI)           | Percent change from 2002 (PA*) |
| Montana       | 1152<br>(865, 1451)     | 41.3                     | 224<br>(168, 282)       | 25.1                     | 151<br>(114, 191)                        | 14.5                     | 80<br>(59, 102) | 17.4<br>(61.8)                 | 27<br>(19, 35)      | 17.4<br>(20.6)                 | 19 (14, 26)               | 8.2 (7.7)                      | 25<br>(18, 34)      | 8.2 (10)                       |
| Nebraska      | 2216<br>(1656, 2768)    | 31.3                     | 232<br>(174, 290)       | 20.4                     | 169<br>(127, 211)                        | 17.3                     | 89<br>(65, 114) | 20.2<br>(59.8)                 | 30<br>(21, 39)      | 20.3<br>(20.2)                 | 22 (15, 29)               | 11.2 (8.7)                     | 28<br>(20, 38)      | 11 (11.3)                      |
| Nevada        | 3281<br>(2432, 4161)    | 79.4                     | 224<br>(166, 284)       | 30.8                     | 170<br>(126, 215)                        | 15.9                     | 90<br>(66, 115) | 18.2<br>(59.4)                 | 30<br>(21, 39)      | 18.2<br>(19.8)                 | 22 (15, 29)               | 10.9 (9.2)                     | 28<br>(20, 38)      | 10.5<br>(11.6)                 |
| New Hampshire | 1594<br>(1198, 2010)    | 41.9                     | 236<br>(178, 298)       | 34.7                     | 156<br>(117, 197)                        | 14.8                     | 82<br>(61, 105) | 16.8<br>(58.4)                 | 27<br>(19, 36)      | 17.8<br>(20.5)                 | 20 (14, 28)               | 11.2<br>(10.2)                 | 26<br>(18, 35)      | 9.1<br>(10.9)                  |
| New Jersey    | 10922<br>(8038, 13780)  | 28.4                     | 238<br>(175, 301)       | 23                       | 165<br>(121, 208)                        | 14.5                     | 87<br>(64, 112) | 17.1<br>(61.1)                 | 29<br>(20, 38)      | 18.1<br>(21.4)                 | 21 (15, 29)               | 8.3 (7.8)                      | 28<br>(19, 37)      | 7.8 (9.6)                      |
| New Mexico    | 2521<br>(1877, 3180)    | 53.6                     | 241<br>(180, 304)       | 38.6                     | 172<br>(129, 216)                        | 19.8                     | 91<br>(67, 117) | 22.4<br>(58.8)                 | 30<br>(21, 40)      | 21.7 (19)                      | 22 (15, 29)               | 14.9<br>(10.1)                 | 29<br>(20, 38)      | 13.7<br>(12.2)                 |
| New York      | 23821<br>(17799, 29969) | 30.1                     | 234<br>(175, 294)       | 26.6                     | 165<br>(124, 209)                        | 18                       | 87<br>(64, 111) | 20.1<br>(57.9)                 | 29<br>(20, 38)      | 21.4<br>(20.3)                 | 21 (15, 29)               | 12.5 (9.5)                     | 28<br>(19, 37)      | 12.6<br>(12.3)                 |

| Location       | YLD number              |                          | YLD per 100,000 persons |                          | Age-standardized YLD per 100,000 persons |                          |                 |                                |                     |                                |                           |                                |                     |                                |
|----------------|-------------------------|--------------------------|-------------------------|--------------------------|------------------------------------------|--------------------------|-----------------|--------------------------------|---------------------|--------------------------------|---------------------------|--------------------------------|---------------------|--------------------------------|
|                |                         |                          |                         |                          | All causes                               |                          | Due to diabetes |                                | Due to hypertension |                                | Due to glomerulonephritis |                                | Due to other causes |                                |
|                | 2016 (UI)               | Percent change from 2002 | 2016 (UI)               | Percent change from 2002 | 2016 (UI)                                | Percent change from 2002 | 2016 (UI)       | Percent change from 2002 (PA*) | 2016 (UI)           | Percent change from 2002 (PA*) | 2016 (UI)                 | Percent change from 2002 (PA*) | 2016 (UI)           | Percent change from 2002 (PA*) |
| North Carolina | 13255<br>(9936, 16668)  | 58                       | 256<br>(192, 321)       | 29.5                     | 183<br>(137, 232)                        | 18.1                     | 97<br>(72, 124) | 20<br>(57.5)                   | 32<br>(23, 43)      | 20.1<br>(19.2)                 | 23 (16, 32)               | 15.3<br>(11.1)                 | 31<br>(22, 41)      | 12.6<br>(12.2)                 |
| North Dakota   | 833 (624, 1050)         | 31.9                     | 222<br>(167, 280)       | 12.3                     | 165<br>(123, 207)                        | 17.7                     | 87<br>(63, 111) | 19.9<br>(57.9)                 | 29<br>(20, 38)      | 19.3<br>(18.8)                 | 21 (15, 29)               | 12.2 (9.4)                     | 28<br>(20, 37)      | 14.1<br>(13.9)                 |
| Ohio           | 15248<br>(11288, 19228) | 28.3                     | 258<br>(191, 325)       | 27                       | 177<br>(132, 225)                        | 16.6                     | 94<br>(69, 120) | 19.6<br>(61)                   | 31<br>(22, 42)      | 19.9<br>(20.5)                 | 23 (16, 31)               | 9.5 (7.9)                      | 30<br>(20, 40)      | 10 (10.7)                      |
| Oklahoma       | 4664<br>(3483, 5854)    | 38.1                     | 236<br>(176, 296)       | 23.7                     | 175<br>(132, 220)                        | 20.3                     | 92<br>(69, 118) | 23.1<br>(58.6)                 | 31<br>(22, 41)      | 23.5<br>(19.8)                 | 23 (16, 31)               | 14.2 (9.5)                     | 29<br>(21, 40)      | 13.8<br>(12.1)                 |
| Oregon         | 4644<br>(3461, 5830)    | 48.9                     | 228<br>(170, 286)       | 29                       | 156<br>(116, 196)                        | 17.4                     | 82<br>(60, 105) | 18.8<br>(56.1)                 | 28<br>(19, 36)      | 20.4<br>(20.3)                 | 20 (14, 27)               | 14.4<br>(10.9)                 | 26<br>(18, 35)      | 12.8<br>(12.7)                 |
| Pennsylvania   | 16849<br>(12607, 21262) | 22.2                     | 258<br>(193, 326)       | 19                       | 168<br>(125, 213)                        | 13.8                     | 89<br>(65, 113) | 16.1<br>(60.1)                 | 30<br>(21, 39)      | 17.2<br>(21.3)                 | 22 (15, 29)               | 8.1 (8)                        | 28<br>(20, 38)      | 8.3<br>(10.6)                  |
| Rhode Island   | 1278<br>(956, 1602)     | 19.7                     | 235<br>(176, 295)       | 21.3                     | 157<br>(117, 198)                        | 14.4                     | 82<br>(60, 105) | 16.8<br>(60.1)                 | 27<br>(19, 36)      | 16.5<br>(19.7)                 | 20 (14, 28)               | 8.5 (8.1)                      | 26<br>(19, 35)      | 9.9<br>(12.1)                  |

| Location       | YLD number              |                          | YLD per 100,000 persons |                          | Age-standardized YLD per 100,000 persons |                          |                 |                                |                     |                                |                           |                                |                     |                                |
|----------------|-------------------------|--------------------------|-------------------------|--------------------------|------------------------------------------|--------------------------|-----------------|--------------------------------|---------------------|--------------------------------|---------------------------|--------------------------------|---------------------|--------------------------------|
|                |                         |                          |                         |                          | All causes                               |                          | Due to diabetes |                                | Due to hypertension |                                | Due to glomerulonephritis |                                | Due to other causes |                                |
|                | 2016 (UI)               | Percent change from 2002 | 2016 (UI)               | Percent change from 2002 | 2016 (UI)                                | Percent change from 2002 | 2016 (UI)       | Percent change from 2002 (PA*) | 2016 (UI)           | Percent change from 2002 (PA*) | 2016 (UI)                 | Percent change from 2002 (PA*) | 2016 (UI)           | Percent change from 2002 (PA*) |
| South Carolina | 6706<br>(4992, 8428)    | 58.6                     | 264<br>(197, 332)       | 31.9                     | 186<br>(139, 235)                        | 17.5                     | 98<br>(71, 126) | 20.2<br>(59.7)                 | 33<br>(23, 44)      | 21.6 (21)                      | 24 (17, 32)               | 10.3 (8)                       | 31<br>(22, 42)      | 11.2<br>(11.3)                 |
| South Dakota   | 989 (747, 1246)         | 37.4                     | 230<br>(174, 290)       | 22.4                     | 161<br>(120, 206)                        | 17.9                     | 85<br>(63, 109) | 20.3<br>(58.7)                 | 28<br>(20, 38)      | 21.3<br>(20.4)                 | 21 (14, 27)               | 10.4 (8)                       | 27<br>(19, 37)      | 13.3<br>(12.9)                 |
| Tennessee      | 8456<br>(6272, 10627)   | 45.4                     | 249<br>(185, 313)       | 27.3                     | 179<br>(134, 225)                        | 18                       | 94<br>(69, 120) | 21.5<br>(61.4)                 | 31<br>(22, 41)      | 19.9 (19)                      | 23 (16, 31)               | 10.2 (7.9)                     | 30<br>(22, 40)      | 11.9<br>(11.7)                 |
| Texas          | 30701<br>(23126, 38327) | 68.7                     | 219<br>(165, 274)       | 31.7                     | 181<br>(136, 227)                        | 21.3                     | 96<br>(71, 121) | 23.7<br>(57.6)                 | 32<br>(22, 42)      | 24.8 (20)                      | 23 (16, 31)               | 15.8 (10)                      | 30<br>(21, 40)      | 15 (12.4)                      |
| Utah           | 2650<br>(1989, 3330)    | 66.2                     | 176<br>(132, 221)       | 28.7                     | 165<br>(124, 208)                        | 16.3                     | 87<br>(65, 111) | 17.5<br>(55.8)                 | 30<br>(21, 39)      | 20.5<br>(21.8)                 | 21 (15, 28)               | 12.9<br>(10.5)                 | 28<br>(20, 38)      | 11 (11.9)                      |
| Vermont        | 752 (559, 960)          | 31.6                     | 237<br>(177, 303)       | 29.6                     | 154<br>(116, 198)                        | 13.3                     | 81<br>(60, 105) | 16.2<br>(62.7)                 | 27<br>(19, 36)      | 15.1<br>(19.6)                 | 20 (14, 27)               | 8.1 (8.3)                      | 26<br>(19, 35)      | 7 (9.4)                        |
| Virginia       | 10143<br>(7577, 12846)  | 47.1                     | 237<br>(177, 301)       | 27.7                     | 175<br>(130, 221)                        | 16.4                     | 92<br>(67, 118) | 19.2<br>(60.4)                 | 31<br>(22, 41)      | 17.5<br>(18.6)                 | 22 (16, 30)               | 10.2 (8.4)                     | 29<br>(20, 39)      | 11.9<br>(12.6)                 |



| Location      | YLD number           |                          | YLD per 100,000 persons |                          | Age-standardized YLD per 100,000 persons |                          |                  |                                |                     |                                |                           |                                |                     |                                |
|---------------|----------------------|--------------------------|-------------------------|--------------------------|------------------------------------------|--------------------------|------------------|--------------------------------|---------------------|--------------------------------|---------------------------|--------------------------------|---------------------|--------------------------------|
|               |                      |                          |                         |                          | All causes                               |                          | Due to diabetes  |                                | Due to hypertension |                                | Due to glomerulonephritis |                                | Due to other causes |                                |
|               | 2016 (UI)            | Percent change from 2002 | 2016 (UI)               | Percent change from 2002 | 2016 (UI)                                | Percent change from 2002 | 2016 (UI)        | Percent change from 2002 (PA*) | 2016 (UI)           | Percent change from 2002 (PA*) | 2016 (UI)                 | Percent change from 2002 (PA*) | 2016 (UI)           | Percent change from 2002 (PA*) |
| Washington    | 7673<br>(5797, 9686) | 56.6                     | 213<br>(161, 269)       | 31.7                     | 156<br>(117, 197)                        | 19.3                     | 82<br>(60, 106)  | 21.8<br>(58.3)                 | 28<br>(20, 37)      | 23 (20.4)                      | 20 (14, 27)               | 12.3 (8.7)                     | 26<br>(19, 36)      | 13.8<br>(12.6)                 |
| West Virginia | 2730<br>(2039, 3423) | 27                       | 295<br>(220, 369)       | 26.4                     | 193<br>(145, 243)                        | 20.5                     | 102<br>(75, 130) | 23.3<br>(58.6)                 | 34<br>(24, 45)      | 22.8 (19)                      | 25 (17, 34)               | 14.8 (9.9)                     | 32<br>(23, 43)      | 14.4<br>(12.5)                 |
| Wisconsin     | 6995<br>(5243, 8805) | 33.1                     | 241<br>(181, 303)       | 25.9                     | 165<br>(124, 208)                        | 15.5                     | 87<br>(65, 112)  | 18.2<br>(60.7)                 | 29<br>(21, 39)      | 18.1<br>(20.2)                 | 21 (15, 28)               | 8.8 (7.7)                      | 28<br>(19, 37)      | 10 (11.4)                      |
| Wyoming       | 570 (425, 720)       | 40.6                     | 199<br>(149, 252)       | 21.7                     | 150<br>(112, 190)                        | 15                       | 79<br>(58, 101)  | 17.3<br>(59.7)                 | 26<br>(18, 35)      | 17.9<br>(20.5)                 | 19 (14, 26)               | 9.4 (8.6)                      | 25<br>(18, 33)      | 9.6<br>(11.2)                  |

YLD: Years Lost due to Disability

UI is the uncertainty interval, it reflects the certainty of an estimate based on data availability, studies size and consistency across data sources

\*Percentage attributed to overall rate is the proportion of overall age-standardized rate change attributed by each of the following four causes: diabetes, hypertension, glomerulonephritis and other causes

**eTable 4c:** Number and age-standardized rate for overall YLD due to CKD and by cause in males, with percentage change from 2002 to 2016 for the United States and by state and district.

| Location      | YLD number                 |                          | YLD per 100,000 persons |                          | Age-standardized YLD per 100,000 persons |                          |                  |                                |                     |                                |                           |                                |                     |                                |
|---------------|----------------------------|--------------------------|-------------------------|--------------------------|------------------------------------------|--------------------------|------------------|--------------------------------|---------------------|--------------------------------|---------------------------|--------------------------------|---------------------|--------------------------------|
|               |                            |                          |                         |                          | All causes                               |                          | Due to diabetes  |                                | Due to hypertension |                                | Due to glomerulonephritis |                                | Due to other causes |                                |
|               | 2016 (UI)                  | Percent change from 2002 | 2016 (UI)               | Percent change from 2002 | 2016 (UI)                                | Percent change from 2002 | 2016 (UI)        | Percent change from 2002 (PA*) | 2016 (UI)           | Percent change from 2002 (PA*) | 2016 (UI)                 | Percent change from 2002 (PA*) | 2016 (UI)           | Percent change from 2002 (PA*) |
| United States | 335224<br>(249762, 423072) | 55.9                     | 211<br>(157, 266)       | 38.5                     | 170<br>(127, 213)                        | 19.3                     | 97<br>(71, 123)  | 21.9<br>(63.1)                 | 29<br>(20, 38)      | 23.3<br>(19.9)                 | 18 (13, 24)               | 12.1 (6.9)                     | 27 (19, 35)         | 11.7<br>(10.2)                 |
| Alabama       | 5544<br>(4077, 7093)       | 49.9                     | 236<br>(173, 301)       | 38.1                     | 187<br>(138, 238)                        | 18.8                     | 106<br>(78, 137) | 21.5<br>(63.7)                 | 32<br>(22, 42)      | 22.2<br>(19.5)                 | 20 (13, 27)               | 12.9 (7.6)                     | 29 (21, 39)         | 10.2<br>(9.2)                  |
| Alaska        | 635<br>(475, 803)          | 73.4                     | 164<br>(123, 207)       | 49.7                     | 158<br>(118, 198)                        | 22.2                     | 90<br>(66, 116)  | 25.2<br>(63.1)                 | 27<br>(19, 36)      | 24.4<br>(18.5)                 | 16 (12, 22)               | 16.2 (8)                       | 25 (17, 33)         | 13.8<br>(10.4)                 |
| Arizona       | 7297<br>(5437, 9109)       | 82.5                     | 213<br>(158, 265)       | 43.3                     | 164<br>(122, 204)                        | 19.9                     | 93<br>(69, 117)  | 23<br>(64.1)                   | 28<br>(20, 37)      | 23 (19.3)                      | 17 (12, 23)               | 10.1 (5.7)                     | 26 (18, 34)         | 13.2<br>(10.9)                 |
| Arkansas      | 3285<br>(2417, 4164)       | 50.1                     | 225<br>(165, 285)       | 35.8                     | 177<br>(129, 223)                        | 20.7                     | 101<br>(73, 129) | 23.9<br>(64.1)                 | 30<br>(21, 40)      | 24.5<br>(19.6)                 | 19 (13, 26)               | 11.9 (6.5)                     | 28 (19, 37)         | 12 (9.8)                       |
| California    | 37593<br>(27578, 47157)    | 55.7                     | 192<br>(141, 241)       | 38.3                     | 164<br>(121, 206)                        | 16.5                     | 93<br>(68, 119)  | 19<br>(64.2)                   | 28<br>(20, 37)      | 22.3<br>(21.8)                 | 17 (12, 23)               | 9.3 (6.3)                      | 26 (18, 35)         | 7.4 (7.6)                      |

| Location             | YLD number              |                          | YLD per 100,000 persons |                          | Age-standardized YLD per 100,000 persons |                          |                  |                                |                     |                                |                           |                                |                     |                                |
|----------------------|-------------------------|--------------------------|-------------------------|--------------------------|------------------------------------------|--------------------------|------------------|--------------------------------|---------------------|--------------------------------|---------------------------|--------------------------------|---------------------|--------------------------------|
|                      |                         |                          |                         |                          | All causes                               |                          | Due to diabetes  |                                | Due to hypertension |                                | Due to glomerulonephritis |                                | Due to other causes |                                |
|                      | 2016 (UI)               | Percent change from 2002 | 2016 (UI)               | Percent change from 2002 | 2016 (UI)                                | Percent change from 2002 | 2016 (UI)        | Percent change from 2002 (PA*) | 2016 (UI)           | Percent change from 2002 (PA*) | 2016 (UI)                 | Percent change from 2002 (PA*) | 2016 (UI)           | Percent change from 2002 (PA*) |
| Colorado             | 4936<br>(3650, 6262)    | 75                       | 178<br>(132, 226)       | 43                       | 152<br>(112, 193)                        | 18.3                     | 86<br>(63, 111)  | 21<br>(63.9)                   | 26<br>(18, 34)      | 21.3<br>(19.4)                 | 16 (11, 22)               | 11 (6.6)                       | 24 (17, 32)         | 11.1<br>(10.2)                 |
| Connecticut          | 3690<br>(2748, 4718)    | 42.5                     | 211<br>(157, 270)       | 36.5                     | 162<br>(120, 206)                        | 20.1                     | 92<br>(67, 119)  | 22.9<br>(63.8)                 | 28<br>(19, 36)      | 23.1<br>(19.1)                 | 17 (12, 22)               | 10.9 (6.1)                     | 25 (17, 34)         | 13.5 (11)                      |
| Delaware             | 1076<br>(788, 1361)     | 67.6                     | 233<br>(171, 295)       | 42.1                     | 174<br>(128, 221)                        | 17.9                     | 100<br>(71, 126) | 20.6<br>(64.3)                 | 30<br>(21, 39)      | 20.4 (19)                      | 18 (12, 25)               | 11.6 (7.1)                     | 27 (19, 37)         | 10.4<br>(9.7)                  |
| District of Columbia | 533<br>(393, 680)       | 27.3                     | 164<br>(121, 209)       | 7                        | 156<br>(115, 199)                        | 5.9                      | 89<br>(64, 114)  | 8.5<br>(64.4)                  | 27<br>(19, 36)      | 11.4<br>(25.4)                 | 16 (11, 22)               | -3.1 (4.7)                     | 24 (17, 33)         | -2.4<br>(5.6)                  |
| Florida              | 24475<br>(18202, 31046) | 68                       | 245<br>(182, 311)       | 36.9                     | 168<br>(124, 214)                        | 21.6                     | 96<br>(70, 123)  | 24.3<br>(62.6)                 | 29<br>(20, 38)      | 26.2 (20)                      | 17 (12, 24)               | 14.5 (7.4)                     | 26 (18, 35)         | 13 (10.1)                      |
| Georgia              | 10270<br>(7564, 13051)  | 70.2                     | 205<br>(151, 261)       | 42.3                     | 181<br>(133, 229)                        | 17.6                     | 103<br>(75, 133) | 20<br>(63.5)                   | 31<br>(22, 41)      | 21.5<br>(20.2)                 | 19 (13, 25)               | 11.1 (6.9)                     | 28 (20, 39)         | 9.9 (9.4)                      |
| Hawaii               | 1594<br>(1181, 1998)    | 58.8                     | 218<br>(162, 273)       | 36.3                     | 170<br>(125, 213)                        | 21                       | 97<br>(71, 124)  | 23.4<br>(62.1)                 | 29<br>(20, 39)      | 24.6<br>(19.4)                 | 18 (12, 24)               | 14.2 (7.4)                     | 27 (18, 36)         | 13.9 (11)                      |

| Location  | YLD number             |                          | YLD per 100,000 persons |                          | Age-standardized YLD per 100,000 persons |                          |                  |                                |                     |                                |                           |                                |                     |                                |
|-----------|------------------------|--------------------------|-------------------------|--------------------------|------------------------------------------|--------------------------|------------------|--------------------------------|---------------------|--------------------------------|---------------------------|--------------------------------|---------------------|--------------------------------|
|           |                        |                          |                         |                          | All causes                               |                          | Due to diabetes  |                                | Due to hypertension |                                | Due to glomerulonephritis |                                | Due to other causes |                                |
|           | 2016 (UI)              | Percent change from 2002 | 2016 (UI)               | Percent change from 2002 | 2016 (UI)                                | Percent change from 2002 | 2016 (UI)        | Percent change from 2002 (PA*) | 2016 (UI)           | Percent change from 2002 (PA*) | 2016 (UI)                 | Percent change from 2002 (PA*) | 2016 (UI)           | Percent change from 2002 (PA*) |
| Idaho     | 1667<br>(1232, 2091)   | 79.2                     | 198<br>(147, 249)       | 43                       | 162<br>(122, 203)                        | 21.2                     | 92<br>(67, 117)  | 23.8<br>(62.3)                 | 28<br>(20, 36)      | 24.9<br>(19.5)                 | 17 (12, 23)               | 14.9 (7.8)                     | 25 (18, 34)         | 13.3<br>(10.5)                 |
| Illinois  | 13019<br>(9633, 16356) | 39.2                     | 206<br>(153, 259)       | 35.7                     | 169<br>(125, 213)                        | 15.3                     | 96<br>(71, 123)  | 17.6<br>(64.2)                 | 29<br>(20, 38)      | 20 (21.6)                      | 17 (12, 24)               | 9.1 (6.5)                      | 26 (19, 35)         | 7 (7.7)                        |
| Indiana   | 7123<br>(5325, 9042)   | 50.7                     | 218<br>(163, 277)       | 39.4                     | 179<br>(133, 227)                        | 20.8                     | 102<br>(74, 130) | 23.7<br>(63.3)                 | 31<br>(22, 40)      | 22.3<br>(18.1)                 | 19 (13, 25)               | 14.7 (7.8)                     | 28 (20, 38)         | 13.4<br>(10.8)                 |
| Iowa      | 3218<br>(2413, 4128)   | 45.3                     | 207<br>(155, 265)       | 34.5                     | 161<br>(121, 205)                        | 21.7                     | 92<br>(68, 118)  | 25<br>(63.7)                   | 27<br>(20, 36)      | 25.8<br>(19.6)                 | 17 (12, 23)               | 13.8 (7.1)                     | 25 (18, 34)         | 12.3<br>(9.6)                  |
| Kansas    | 3023<br>(2256, 3806)   | 46.3                     | 209<br>(156, 263)       | 35.4                     | 172<br>(128, 217)                        | 20.7                     | 97<br>(71, 124)  | 22.9<br>(61.8)                 | 29<br>(21, 39)      | 24.1<br>(19.4)                 | 18 (13, 25)               | 15.3 (8.1)                     | 27 (19, 35)         | 13.4<br>(10.8)                 |
| Kentucky  | 4941<br>(3676, 6228)   | 52                       | 227<br>(169, 286)       | 39.7                     | 182<br>(135, 228)                        | 20                       | 103<br>(74, 131) | 23.1<br>(63.7)                 | 31<br>(22, 41)      | 22 (18.5)                      | 19 (14, 26)               | 12.6 (7)                       | 29 (20, 38)         | 12.9<br>(10.8)                 |
| Louisiana | 5083<br>(3718, 6526)   | 43.9                     | 222<br>(162, 285)       | 37.3                     | 188<br>(137, 239)                        | 18.1                     | 107<br>(77, 136) | 20.9<br>(64)                   | 32<br>(23, 43)      | 21.2<br>(19.5)                 | 19 (13, 26)               | 10.7 (6.5)                     | 30 (21, 40)         | 10.8 (10)                      |

| Location      | YLD number             |                          | YLD per 100,000 persons |                          | Age-standardized YLD per 100,000 persons |                          |                  |                                |                     |                                |                           |                                |                     |                                |
|---------------|------------------------|--------------------------|-------------------------|--------------------------|------------------------------------------|--------------------------|------------------|--------------------------------|---------------------|--------------------------------|---------------------------|--------------------------------|---------------------|--------------------------------|
|               |                        |                          |                         |                          | All causes                               |                          | Due to diabetes  |                                | Due to hypertension |                                | Due to glomerulonephritis |                                | Due to other causes |                                |
|               | 2016 (UI)              | Percent change from 2002 | 2016 (UI)               | Percent change from 2002 | 2016 (UI)                                | Percent change from 2002 | 2016 (UI)        | Percent change from 2002 (PA*) | 2016 (UI)           | Percent change from 2002 (PA*) | 2016 (UI)                 | Percent change from 2002 (PA*) | 2016 (UI)           | Percent change from 2002 (PA*) |
| Maine         | 1582<br>(1182, 2009)   | 51.7                     | 243<br>(182, 309)       | 46.8                     | 165<br>(123, 209)                        | 19.4                     | 93<br>(68, 120)  | 21.7<br>(62)                   | 28<br>(20, 37)      | 22.1 (19)                      | 17 (12, 24)               | 11.7 (6.7)                     | 26 (18, 35)         | 14.4<br>(12.2)                 |
| Maryland      | 6019<br>(4443, 7677)   | 49.9                     | 206<br>(152, 263)       | 34.5                     | 169<br>(125, 215)                        | 16.1                     | 97<br>(70, 125)  | 18.2<br>(63.4)                 | 29<br>(20, 38)      | 21.9 (22)                      | 17 (12, 24)               | 6.9 (4.8)                      | 26 (18, 36)         | 9.6 (9.9)                      |
| Massachusetts | 7103<br>(5235, 9034)   | 45.7                     | 214<br>(158, 272)       | 35.9                     | 167<br>(123, 211)                        | 18.7                     | 95<br>(70, 123)  | 21 (63)                        | 29<br>(20, 38)      | 22.4<br>(20.2)                 | 17 (12, 23)               | 12 (6.8)                       | 26 (18, 35)         | 11.4 (10)                      |
| Michigan      | 10930<br>(8105, 13788) | 43.1                     | 224<br>(166, 283)       | 44.2                     | 173<br>(129, 218)                        | 19.1                     | 98<br>(72, 126)  | 21.9<br>(63.5)                 | 30<br>(21, 39)      | 22.9<br>(19.8)                 | 18 (13, 24)               | 11.8 (6.9)                     | 27 (19, 36)         | 11.2<br>(9.8)                  |
| Minnesota     | 5541<br>(4073, 7085)   | 53.4                     | 202<br>(149, 259)       | 39.1                     | 161<br>(118, 206)                        | 18.2                     | 92<br>(66, 119)  | 20.4<br>(62.5)                 | 27<br>(19, 37)      | 20.2<br>(18.5)                 | 17 (12, 23)               | 12.7 (7.6)                     | 25 (18, 34)         | 12.6<br>(11.4)                 |
| Mississippi   | 3330<br>(2471, 4262)   | 46.6                     | 230<br>(171, 294)       | 40                       | 191<br>(142, 244)                        | 19.7                     | 109<br>(79, 141) | 22.3<br>(63.3)                 | 32<br>(23, 43)      | 23.6<br>(19.6)                 | 20 (14, 27)               | 13.2 (7.4)                     | 30 (21, 40)         | 11.3<br>(9.6)                  |
| Missouri      | 6588<br>(4860, 8299)   | 50.4                     | 221<br>(163, 278)       | 39.2                     | 173<br>(128, 218)                        | 20.9                     | 98<br>(72, 125)  | 23.7<br>(62.9)                 | 30<br>(21, 39)      | 24.2<br>(19.2)                 | 18 (12, 25)               | 14 (7.3)                       | 27 (19, 37)         | 13.2<br>(10.6)                 |

| Location      | YLD number              |                          | YLD per 100,000 persons |                          | Age-standardized YLD per 100,000 persons |                          |                 |                                |                     |                                |                           |                                |                     |                                |
|---------------|-------------------------|--------------------------|-------------------------|--------------------------|------------------------------------------|--------------------------|-----------------|--------------------------------|---------------------|--------------------------------|---------------------------|--------------------------------|---------------------|--------------------------------|
|               |                         |                          |                         |                          | All causes                               |                          | Due to diabetes |                                | Due to hypertension |                                | Due to glomerulonephritis |                                | Due to other causes |                                |
|               | 2016 (UI)               | Percent change from 2002 | 2016 (UI)               | Percent change from 2002 | 2016 (UI)                                | Percent change from 2002 | 2016 (UI)       | Percent change from 2002 (PA*) | 2016 (UI)           | Percent change from 2002 (PA*) | 2016 (UI)                 | Percent change from 2002 (PA*) | 2016 (UI)           | Percent change from 2002 (PA*) |
| Montana       | 1086<br>(810, 1380)     | 60.8                     | 208<br>(155, 265)       | 40.1                     | 152<br>(114, 191)                        | 19.7                     | 86<br>(63, 109) | 22.2<br>(62.6)                 | 26<br>(18, 34)      | 21.2<br>(18.1)                 | 16 (11, 22)               | 12 (6.9)                       | 24 (17, 32)         | 14.9<br>(12.5)                 |
| Nebraska      | 1953<br>(1452, 2463)    | 50.8                     | 205<br>(153, 259)       | 35.3                     | 169<br>(126, 213)                        | 22.3                     | 96<br>(71, 122) | 24.7<br>(61.7)                 | 29<br>(20, 38)      | 25.1<br>(18.8)                 | 18 (12, 24)               | 16.6 (8.1)                     | 26 (18, 36)         | 15.3<br>(11.4)                 |
| Nevada        | 3168<br>(2350, 4028)    | 83.5                     | 216<br>(160, 274)       | 37.5                     | 173<br>(127, 218)                        | 16.8                     | 98<br>(72, 125) | 19.5<br>(64.3)                 | 30<br>(21, 39)      | 20.3<br>(20.1)                 | 18 (12, 24)               | 9.9 (6.5)                      | 27 (19, 36)         | 9.1 (9.1)                      |
| New Hampshire | 1439<br>(1069, 1854)    | 57.2                     | 218<br>(162, 281)       | 48.4                     | 158<br>(117, 202)                        | 18.1                     | 90<br>(65, 116) | 20.4<br>(62.7)                 | 27<br>(19, 35)      | 21.7<br>(19.9)                 | 17 (12, 23)               | 13.2 (8)                       | 25 (18, 34)         | 10.1<br>(9.5)                  |
| New Jersey    | 9251<br>(6845, 11659)   | 41.2                     | 211<br>(156, 266)       | 33.7                     | 168<br>(125, 210)                        | 17.4                     | 96<br>(70, 123) | 19.4<br>(62.8)                 | 29<br>(20, 38)      | 21.1<br>(20.1)                 | 17 (12, 23)               | 12.2 (7.5)                     | 26 (18, 35)         | 10.1<br>(9.6)                  |
| New Mexico    | 2245<br>(1687, 2839)    | 65.3                     | 218<br>(164, 276)       | 47                       | 171<br>(129, 216)                        | 22.3                     | 97<br>(71, 123) | 24.4<br>(60.7)                 | 29<br>(21, 39)      | 25.7<br>(19.3)                 | 18 (13, 24)               | 14.9 (7.4)                     | 27 (19, 36)         | 17 (12.5)                      |
| New York      | 19946<br>(14828, 25647) | 43.8                     | 207<br>(154, 266)       | 38.1                     | 166<br>(124, 213)                        | 20.5                     | 95<br>(69, 122) | 22.9<br>(62.4)                 | 28<br>(20, 37)      | 23.4<br>(18.9)                 | 17 (12, 23)               | 13 (6.9)                       | 26 (18, 35)         | 14.7<br>(11.7)                 |

| Location       | YLD number              |                          | YLD per 100,000 persons |                          | Age-standardized YLD per 100,000 persons |                          |                  |                                |                     |                                |                           |                                |                     |                                |
|----------------|-------------------------|--------------------------|-------------------------|--------------------------|------------------------------------------|--------------------------|------------------|--------------------------------|---------------------|--------------------------------|---------------------------|--------------------------------|---------------------|--------------------------------|
|                |                         |                          |                         |                          | All causes                               |                          | Due to diabetes  |                                | Due to hypertension |                                | Due to glomerulonephritis |                                | Due to other causes |                                |
|                | 2016 (UI)               | Percent change from 2002 | 2016 (UI)               | Percent change from 2002 | 2016 (UI)                                | Percent change from 2002 | 2016 (UI)        | Percent change from 2002 (PA*) | 2016 (UI)           | Percent change from 2002 (PA*) | 2016 (UI)                 | Percent change from 2002 (PA*) | 2016 (UI)           | Percent change from 2002 (PA*) |
| North Carolina | 10832<br>(7995, 13706)  | 71.1                     | 220<br>(163, 279)       | 41.9                     | 178<br>(131, 225)                        | 19.6                     | 102<br>(74, 130) | 22.3<br>(63.6)                 | 30<br>(21, 39)      | 24.1<br>(20.2)                 | 18 (12, 25)               | 12 (6.7)                       | 28 (19, 37)         | 11.2<br>(9.5)                  |
| North Dakota   | 772<br>(575, 968)       | 52.1                     | 195<br>(145, 245)       | 22.7                     | 166<br>(124, 209)                        | 21.7                     | 94<br>(70, 120)  | 24.4<br>(62.6)                 | 28<br>(20, 37)      | 24.3<br>(18.6)                 | 17 (13, 24)               | 16 (8.1)                       | 26 (18, 35)         | 13.8<br>(10.6)                 |
| Ohio           | 12919<br>(9594, 16354)  | 43.2                     | 227<br>(169, 287)       | 39.7                     | 176<br>(130, 222)                        | 19.8                     | 100<br>(74, 128) | 22.1<br>(62.3)                 | 30<br>(21, 40)      | 23.2<br>(19.4)                 | 18 (13, 25)               | 12.8 (7.1)                     | 28 (19, 37)         | 13.4<br>(11.3)                 |
| Oklahoma       | 4051<br>(3032, 5134)    | 52.8                     | 209<br>(156, 265)       | 35.6                     | 174<br>(129, 220)                        | 22.5                     | 98<br>(72, 126)  | 25.5<br>(62.7)                 | 30<br>(21, 39)      | 24.8<br>(18.4)                 | 18 (13, 25)               | 14.3 (7.2)                     | 27 (19, 37)         | 15.7<br>(11.7)                 |
| Oregon         | 4138<br>(3090, 5274)    | 63.8                     | 207<br>(154, 263)       | 42.3                     | 156<br>(115, 197)                        | 20.5                     | 88<br>(65, 113)  | 23.4<br>(63.6)                 | 27<br>(19, 35)      | 23.9<br>(19.5)                 | 16 (11, 22)               | 14.2 (7.6)                     | 24 (17, 32)         | 11.3<br>(9.4)                  |
| Pennsylvania   | 14241<br>(10508, 18066) | 37.3                     | 228<br>(168, 289)       | 30.9                     | 169<br>(125, 214)                        | 16.6                     | 96<br>(70, 123)  | 18.7<br>(62.6)                 | 29<br>(20, 39)      | 19.7<br>(19.8)                 | 18 (12, 24)               | 10.4 (6.8)                     | 27 (18, 36)         | 10.8<br>(10.8)                 |
| Rhode Island   | 1081<br>(796, 1369)     | 35.9                     | 211<br>(156, 268)       | 35.9                     | 162<br>(119, 205)                        | 18.9                     | 92<br>(67, 117)  | 21.6<br>(63.5)                 | 28<br>(19, 36)      | 21 (18.7)                      | 17 (12, 23)               | 13.1 (7.6)                     | 25 (18, 35)         | 11.5<br>(10.3)                 |

| Location       | YLD number              |                          | YLD per 100,000 persons |                          | Age-standardized YLD per 100,000 persons |                          |                  |                                |                     |                                |                           |                                |                     |                                |
|----------------|-------------------------|--------------------------|-------------------------|--------------------------|------------------------------------------|--------------------------|------------------|--------------------------------|---------------------|--------------------------------|---------------------------|--------------------------------|---------------------|--------------------------------|
|                |                         |                          |                         |                          | All causes                               |                          | Due to diabetes  |                                | Due to hypertension |                                | Due to glomerulonephritis |                                | Due to other causes |                                |
|                | 2016 (UI)               | Percent change from 2002 | 2016 (UI)               | Percent change from 2002 | 2016 (UI)                                | Percent change from 2002 | 2016 (UI)        | Percent change from 2002 (PA*) | 2016 (UI)           | Percent change from 2002 (PA*) | 2016 (UI)                 | Percent change from 2002 (PA*) | 2016 (UI)           | Percent change from 2002 (PA*) |
| South Carolina | 5557<br>(4086, 7110)    | 74                       | 232<br>(170, 297)       | 44.7                     | 180<br>(132, 230)                        | 19.1                     | 102<br>(75, 132) | 21.6<br>(62.9)                 | 31<br>(21, 41)      | 23.4<br>(20.3)                 | 19 (13, 25)               | 12.9 (7.4)                     | 28 (20, 38)         | 10.8<br>(9.4)                  |
| South Dakota   | 885<br>(660, 1119)      | 54.6                     | 203<br>(152, 257)       | 34.2                     | 160<br>(119, 203)                        | 19.9                     | 90<br>(67, 117)  | 22.4<br>(62.6)                 | 27<br>(19, 36)      | 23.2<br>(19.4)                 | 17 (12, 23)               | 12.7 (7.1)                     | 25 (18, 34)         | 12.9<br>(10.9)                 |
| Tennessee      | 7057<br>(5185, 8981)    | 61.8                     | 218<br>(160, 278)       | 41.4                     | 174<br>(128, 220)                        | 20.7                     | 99<br>(72, 127)  | 23.7<br>(63.4)                 | 30<br>(21, 39)      | 25.3<br>(20.1)                 | 18 (12, 25)               | 12.2 (6.6)                     | 27 (19, 37)         | 12.2<br>(9.9)                  |
| Texas          | 26499<br>(19811, 33530) | 82.1                     | 192<br>(143, 242)       | 42.2                     | 177<br>(132, 223)                        | 23.5                     | 101<br>(74, 130) | 26<br>(61.9)                   | 30<br>(21, 40)      | 28.1<br>(19.7)                 | 18 (13, 25)               | 14.4 (6.8)                     | 28 (19, 37)         | 16.5<br>(11.6)                 |
| Utah           | 2514<br>(1893, 3168)    | 81                       | 165<br>(124, 208)       | 39.7                     | 169<br>(127, 213)                        | 19.5                     | 96<br>(71, 122)  | 22.6<br>(64.2)                 | 29<br>(21, 38)      | 22.3<br>(19.1)                 | 17 (12, 23)               | 10.4 (5.9)                     | 26 (19, 36)         | 12.6<br>(10.7)                 |
| Vermont        | 658<br>(490, 831)       | 49.1                     | 214<br>(159, 270)       | 46.2                     | 152<br>(112, 191)                        | 18.6                     | 87<br>(63, 111)  | 21.1<br>(63.1)                 | 26<br>(18, 34)      | 22.5<br>(19.9)                 | 16 (11, 21)               | 11.3 (6.8)                     | 24 (17, 32)         | 11.4<br>(10.3)                 |
| Virginia       | 8743<br>(6382, 11072)   | 61                       | 211<br>(154, 267)       | 38.7                     | 174<br>(127, 220)                        | 18.9                     | 99<br>(71, 127)  | 20.9<br>(61.9)                 | 30<br>(21, 39)      | 23.1<br>(20.1)                 | 18 (13, 25)               | 13.4 (7.7)                     | 27 (19, 36)         | 11.8<br>(10.3)                 |



| Location      | YLD number           |                          | YLD per 100,000 persons |                          | Age-standardized YLD per 100,000 persons |                          |                  |                                |                     |                                |                           |                                |                     |                                |
|---------------|----------------------|--------------------------|-------------------------|--------------------------|------------------------------------------|--------------------------|------------------|--------------------------------|---------------------|--------------------------------|---------------------------|--------------------------------|---------------------|--------------------------------|
|               |                      |                          |                         |                          | All causes                               |                          | Due to diabetes  |                                | Due to hypertension |                                | Due to glomerulonephritis |                                | Due to other causes |                                |
|               | 2016 (UI)            | Percent change from 2002 | 2016 (UI)               | Percent change from 2002 | 2016 (UI)                                | Percent change from 2002 | 2016 (UI)        | Percent change from 2002 (PA*) | 2016 (UI)           | Percent change from 2002 (PA*) | 2016 (UI)                 | Percent change from 2002 (PA*) | 2016 (UI)           | Percent change from 2002 (PA*) |
| Washington    | 6959<br>(5183, 8916) | 72.4                     | 193<br>(143, 247)       | 43.7                     | 156<br>(116, 200)                        | 22.8                     | 89<br>(65, 115)  | 25.4<br>(62.1)                 | 27<br>(19, 35)      | 26.3<br>(19.2)                 | 16 (11, 22)               | 14.8 (7.2)                     | 24 (17, 33)         | 15.9<br>(11.6)                 |
| West Virginia | 2371<br>(1755, 3008) | 45.7                     | 262<br>(194, 333)       | 42                       | 187<br>(141, 234)                        | 23.4                     | 106<br>(77, 135) | 26.6<br>(62.7)                 | 32<br>(23, 42)      | 25.9<br>(18.5)                 | 20 (14, 27)               | 15.9 (7.6)                     | 30 (21, 39)         | 15.6<br>(11.3)                 |
| Wisconsin     | 6193<br>(4560, 7765) | 51.3                     | 216<br>(159, 271)       | 41.8                     | 166<br>(122, 208)                        | 20.3                     | 94<br>(68, 119)  | 23.1<br>(63.2)                 | 28<br>(20, 38)      | 24.1<br>(19.8)                 | 17 (12, 23)               | 11.8 (6.4)                     | 26 (18, 35)         | 12.9<br>(10.6)                 |
| Wyoming       | 569<br>(419, 721)    | 61.7                     | 191<br>(141, 242)       | 36.5                     | 153<br>(114, 192)                        | 19.5                     | 86<br>(64, 111)  | 21.5<br>(61.5)                 | 26<br>(19, 35)      | 22.7<br>(19.4)                 | 16 (11, 22)               | 12.4 (7.1)                     | 24 (17, 33)         | 14.2 (12)                      |

YLD: Years Lost due to Disability

UI is the uncertainty interval, it reflects the certainty of an estimate based on data availability, studies size and consistency across data sources

\*Percentage attributed to overall rate is the proportion of overall age-standardized rate change attributed by each of the following four causes: diabetes, hypertension, glomerulonephritis and other causes

**eTable5:** Years of life lost (YLL) due to CKD in the United States and by state and district in the overall population, and in females and males.

**eTable 5a:** Number and age-standardized rate for overall YLL due to CKD and by cause, with percentage change from 2002 to 2016 for the United States and by state and district.

| Location      | YLL number                    |                          | YLL per 100,000 persons |                          | Age-standardized YLL per 100,000 persons |                          |                   |                                |                     |                                |                           |                                |                     |                                |
|---------------|-------------------------------|--------------------------|-------------------------|--------------------------|------------------------------------------|--------------------------|-------------------|--------------------------------|---------------------|--------------------------------|---------------------------|--------------------------------|---------------------|--------------------------------|
|               |                               |                          |                         |                          | All causes                               |                          | Due to diabetes   |                                | Due to hypertension |                                | Due to glomerulonephritis |                                | Due to other causes |                                |
|               | 2016 (UI)                     | Percent change from 2002 | 2016 (UI)               | Percent change from 2002 | 2016 (UI)                                | Percent change from 2002 | 2016 (UI)         | Percent change from 2002 (PA*) | 2016 (UI)           | Percent change from 2002 (PA*) | 2016 (UI)                 | Percent change from 2002 (PA*) | 2016 (UI)           | Percent change from 2002 (PA*) |
| United States | 1212506<br>(1179966, 1243846) | 55.6                     | 376<br>(365, 385)       | 38.6                     | 270<br>(263, 277)                        | 19.3                     | 151<br>(140, 162) | 22.6<br>(64)                   | 53<br>(46, 62)      | 22.5<br>(22.4)                 | 25 (21, 29)               | 10.2 (5.4)                     | 40<br>(34, 47)      | 9.8<br>(8.2)                   |
| Alabama       | 28079<br>(24728, 31384)       | 47.9                     | 578<br>(509, 646)       | 36.4                     | 414<br>(364, 463)                        | 20.1                     | 233<br>(200, 265) | 24.5<br>(66.5)                 | 76<br>(63, 92)      | 17.6<br>(16.4)                 | 41 (33, 50)               | 13.9 (7.2)                     | 64<br>(52, 77)      | 12 (9.9)                       |
| Alaska        | 1545<br>(1356, 1742)          | 85.9                     | 210<br>(184, 237)       | 63.4                     | 201<br>(176, 226)                        | 25.8                     | 109<br>(94, 125)  | 29<br>(59.7)                   | 40<br>(33, 48)      | 32.8 (24)                      | 20 (16, 24)               | 14.9 (6.3)                     | 31<br>(25, 38)      | 15.2<br>(10)                   |
| Arizona       | 21928<br>(19820, 24041)       | 77.8                     | 317<br>(287, 348)       | 38.9                     | 224<br>(203, 245)                        | 16.7                     | 126<br>(111, 141) | 21.2<br>(68.9)                 | 42<br>(36, 50)      | 16.7<br>(18.9)                 | 21 (17, 26)               | 8.2 (5.1)                      | 34<br>(28, 40)      | 7.3<br>(7.1)                   |
| Arkansas      | 15565<br>(14194, 17021)       | 60.7                     | 523<br>(477, 572)       | 46.1                     | 373<br>(341, 409)                        | 32.3                     | 210<br>(186, 235) | 37.4<br>(62.8)                 | 70<br>(59, 81)      | 35.2<br>(19.8)                 | 37 (30, 44)               | 20.5 (6.8)                     | 57<br>(48, 68)      | 20.4<br>(10.6)                 |

| Location             | YLL number                |                          | YLL per 100,000 persons |                          | Age-standardized YLL per 100,000 persons |                          |                   |                                |                     |                                |                           |                                |                     |                                |
|----------------------|---------------------------|--------------------------|-------------------------|--------------------------|------------------------------------------|--------------------------|-------------------|--------------------------------|---------------------|--------------------------------|---------------------------|--------------------------------|---------------------|--------------------------------|
|                      |                           |                          |                         |                          | All causes                               |                          | Due to diabetes   |                                | Due to hypertension |                                | Due to glomerulonephritis |                                | Due to other causes |                                |
|                      | 2016 (UI)                 | Percent change from 2002 | 2016 (UI)               | Percent change from 2002 | 2016 (UI)                                | Percent change from 2002 | 2016 (UI)         | Percent change from 2002 (PA*) | 2016 (UI)           | Percent change from 2002 (PA*) | 2016 (UI)                 | Percent change from 2002 (PA*) | 2016 (UI)           | Percent change from 2002 (PA*) |
| California           | 109134<br>(97343, 120602) | 75.6                     | 277<br>(247, 306)       | 55.6                     | 213<br>(190, 235)                        | 27.8                     | 120<br>(105, 137) | 31.3<br>(62)                   | 43<br>(35, 51)      | 36 (24.3)                      | 19 (15, 23)               | 13.5 (4.9)                     | 31<br>(25, 38)      | 15.2<br>(8.8)                  |
| Colorado             | 12694<br>(11574, 13889)   | 69.9                     | 230<br>(210, 252)       | 38.5                     | 180<br>(164, 197)                        | 11.4                     | 99<br>(87, 111)   | 14.6<br>(68.4)                 | 38<br>(32, 44)      | 12.7 (23)                      | 17 (14, 20)               | 4.5 (3.9)                      | 27<br>(22, 32)      | 3.3<br>(4.7)                   |
| Connecticut          | 10635<br>(9532, 11911)    | 26.1                     | 297<br>(266, 333)       | 21.5                     | 196<br>(175, 220)                        | 6.5                      | 108<br>(94, 124)  | 7.6<br>(63.1)                  | 41<br>(34, 48)      | 11.5<br>(34.8)                 | 18 (15, 22)               | 0.9 (1.4)                      | 29<br>(24, 35)      | -0.3<br>(0.7)                  |
| Delaware             | 3938<br>(3618, 4270)      | 68.3                     | 413<br>(380, 448)       | 42.4                     | 278<br>(255, 301)                        | 18                       | 156<br>(137, 173) | 21.6<br>(65.2)                 | 53<br>(45, 62)      | 19.3<br>(20.1)                 | 27 (22, 32)               | 11.6 (6.7)                     | 42<br>(35, 50)      | 8.7 (8)                        |
| District of Columbia | 2696<br>(2395, 3026)      | 0.3                      | 394<br>(350, 442)       | -15.1                    | 353<br>(313, 397)                        | -12.9                    | 205<br>(177, 234) | -9.4<br>(40.6)                 | 63<br>(52, 76)      | -4.7 (5.9)                     | 33 (26, 40)               | -26.9 (23)                     | 52<br>(42, 64)      | -23.3<br>(30.4)                |
| Florida              | 77859<br>(70554, 85859)   | 70.6                     | 381<br>(345, 420)       | 39.1                     | 235<br>(213, 260)                        | 24.6                     | 133<br>(117, 150) | 29.9<br>(66.1)                 | 44<br>(37, 52)      | 26.4<br>(19.7)                 | 22 (18, 27)               | 12.4 (5.3)                     | 35<br>(30, 43)      | 13.1<br>(8.9)                  |
| Georgia              | 48315<br>(43241, 53927)   | 65.2                     | 470<br>(421, 525)       | 36.9                     | 377<br>(337, 420)                        | 11.3                     | 212<br>(184, 240) | 13.8<br>(67.3)                 | 73<br>(61, 87)      | 15 (25.1)                      | 35 (28, 43)               | 3.8 (3.4)                      | 56<br>(46, 67)      | 3 (4.3)                        |

| Location | YLL number              |                          | YLL per 100,000 persons |                          | Age-standardized YLL per 100,000 persons |                          |                   |                                |                     |                                |                           |                                |                     |                                |
|----------|-------------------------|--------------------------|-------------------------|--------------------------|------------------------------------------|--------------------------|-------------------|--------------------------------|---------------------|--------------------------------|---------------------------|--------------------------------|---------------------|--------------------------------|
|          |                         |                          |                         |                          | All causes                               |                          | Due to diabetes   |                                | Due to hypertension |                                | Due to glomerulonephritis |                                | Due to other causes |                                |
|          | 2016 (UI)               | Percent change from 2002 | 2016 (UI)               | Percent change from 2002 | 2016 (UI)                                | Percent change from 2002 | 2016 (UI)         | Percent change from 2002 (PA*) | 2016 (UI)           | Percent change from 2002 (PA*) | 2016 (UI)                 | Percent change from 2002 (PA*) | 2016 (UI)           | Percent change from 2002 (PA*) |
| Hawaii   | 4579<br>(4207, 4989)    | 70.8                     | 318<br>(292, 346)       | 47.8                     | 216<br>(198, 234)                        | 25.9                     | 122<br>(108, 136) | 30.4<br>(64.3)                 | 41<br>(35, 49)      | 27.5 (20)                      | 20 (16, 24)               | 15.9 (6.2)                     | 32<br>(27, 38)      | 15.2<br>(9.5)                  |
| Idaho    | 4630<br>(4117, 5180)    | 100.2                    | 276<br>(246, 309)       | 59.8                     | 205<br>(182, 230)                        | 34.7                     | 112<br>(97, 129)  | 38.4<br>(58.8)                 | 43<br>(35, 51)      | 39.1<br>(22.8)                 | 19 (15, 23)               | 24.5 (7.1)                     | 31<br>(25, 37)      | 23.8<br>(11.2)                 |
| Illinois | 51079<br>(46812, 55429) | 31.3                     | 398<br>(365, 432)       | 28.2                     | 288<br>(264, 313)                        | 8.7                      | 161<br>(143, 181) | 10.9<br>(66.2)                 | 59<br>(49, 69)      | 15.1 (32)                      | 26 (21, 31)               | -1 (1.1)                       | 43<br>(35, 51)      | -0.4<br>(0.8)                  |
| Indiana  | 30636<br>(27386, 34394) | 56.3                     | 462<br>(413, 519)       | 45.1                     | 335<br>(299, 377)                        | 26.6                     | 185<br>(160, 214) | 29.8<br>(60.4)                 | 68<br>(56, 82)      | 28.5<br>(21.3)                 | 32 (26, 38)               | 19.9 (7.5)                     | 51<br>(42, 62)      | 17.7<br>(10.8)                 |
| Iowa     | 8961<br>(8150, 9839)    | 62.4                     | 286<br>(260, 314)       | 51.8                     | 189<br>(171, 207)                        | 40.1                     | 104<br>(91, 117)  | 44.1<br>(58.8)                 | 40<br>(33, 47)      | 46 (23.1)                      | 17 (14, 21)               | 27.2 (6.8)                     | 28<br>(23, 34)      | 27.8<br>(11.3)                 |
| Kansas   | 10999<br>(9764, 12345)  | 46.2                     | 378<br>(336, 425)       | 36.4                     | 272<br>(240, 307)                        | 24.7                     | 151<br>(129, 173) | 29.1<br>(63.3)                 | 55<br>(46, 66)      | 24.4 (20)                      | 25 (21, 31)               | 16.8 (6.8)                     | 41<br>(33, 50)      | 15.1<br>(10)                   |
| Kentucky | 22743<br>(20952, 24704) | 63.3                     | 514<br>(473, 558)       | 50.9                     | 367<br>(339, 398)                        | 30.3                     | 205<br>(183, 231) | 34.8<br>(62)                   | 72<br>(60, 84)      | 30.1<br>(19.5)                 | 35 (29, 41)               | 22.3 (7.4)                     | 55<br>(46, 65)      | 20.8<br>(11.1)                 |

| Location      | YLL number              |                          | YLL per 100,000 persons |                          | Age-standardized YLL per 100,000 persons |                          |                   |                                |                     |                                |                           |                                |                     |                                |
|---------------|-------------------------|--------------------------|-------------------------|--------------------------|------------------------------------------|--------------------------|-------------------|--------------------------------|---------------------|--------------------------------|---------------------------|--------------------------------|---------------------|--------------------------------|
|               |                         |                          |                         |                          | All causes                               |                          | Due to diabetes   |                                | Due to hypertension |                                | Due to glomerulonephritis |                                | Due to other causes |                                |
|               | 2016 (UI)               | Percent change from 2002 | 2016 (UI)               | Percent change from 2002 | 2016 (UI)                                | Percent change from 2002 | 2016 (UI)         | Percent change from 2002 (PA*) | 2016 (UI)           | Percent change from 2002 (PA*) | 2016 (UI)                 | Percent change from 2002 (PA*) | 2016 (UI)           | Percent change from 2002 (PA*) |
| Louisiana     | 29904<br>(27750, 32623) | 40.5                     | 639<br>(593, 697)       | 35.1                     | 489<br>(453, 532)                        | 16.3                     | 275<br>(248, 307) | 19.5<br>(65.6)                 | 91<br>(77, 107)     | 20.3<br>(22.4)                 | 48 (39, 57)               | 7.3 (4.8)                      | 75<br>(63, 88)      | 7.1<br>(7.2)                   |
| Maine         | 5164<br>(4743, 5605)    | 47.3                     | 389<br>(357, 422)       | 43.4                     | 229<br>(211, 249)                        | 17.3                     | 125<br>(111, 139) | 19.6<br>(60.3)                 | 48<br>(40, 57)      | 18.2<br>(21.9)                 | 22 (18, 26)               | 12.9 (7.4)                     | 35<br>(29, 42)      | 11.3<br>(10.5)                 |
| Maryland      | 21231<br>(19553, 23038) | 38.5                     | 352<br>(324, 382)       | 24.8                     | 259<br>(239, 281)                        | 5.7                      | 145<br>(129, 162) | 7.9<br>(62.1)                  | 50<br>(42, 59)      | 10.9<br>(28.9)                 | 25 (20, 29)               | -2.4 (3.5)                     | 39<br>(32, 47)      | -2.3<br>(5.5)                  |
| Massachusetts | 22393<br>(20464, 24280) | 24.8                     | 328<br>(300, 356)       | 17.1                     | 222<br>(202, 241)                        | 4                        | 122<br>(108, 137) | 5.1<br>(59.4)                  | 47<br>(40, 55)      | 7.7<br>(33.4)                  | 20 (16, 24)               | -0.3 (0.6)                     | 33<br>(27, 39)      | -2 (6.6)                       |
| Michigan      | 40162<br>(36943, 43278) | 42                       | 405<br>(373, 437)       | 43.3                     | 276<br>(253, 297)                        | 17.8                     | 153<br>(138, 169) | 20.6<br>(62.8)                 | 55<br>(47, 65)      | 20 (22)                        | 26 (22, 31)               | 11.4 (6.4)                     | 41<br>(35, 50)      | 9.6<br>(8.8)                   |
| Minnesota     | 16207<br>(14841, 17829) | 56.6                     | 294<br>(269, 324)       | 42.4                     | 203<br>(186, 224)                        | 21.7                     | 110<br>(95, 123)  | 25.1<br>(60.7)                 | 45<br>(38, 54)      | 24 (24)                        | 18 (15, 22)               | 13.1 (5.9)                     | 30<br>(25, 37)      | 12.6<br>(9.4)                  |
| Mississippi   | 19897<br>(17639, 22308) | 52.2                     | 666<br>(590, 746)       | 45.5                     | 499<br>(443, 562)                        | 25.3                     | 283<br>(244, 324) | 29.9<br>(64.5)                 | 91<br>(75, 110)     | 27.2<br>(19.2)                 | 49 (40, 59)               | 15.2 (6.5)                     | 77<br>(63, 91)      | 14.9<br>(9.8)                  |

| Location      | YLL number              |                          | YLL per 100,000 persons |                          | Age-standardized YLL per 100,000 persons |                          |                   |                                |                     |                                |                           |                                |                     |                                |
|---------------|-------------------------|--------------------------|-------------------------|--------------------------|------------------------------------------|--------------------------|-------------------|--------------------------------|---------------------|--------------------------------|---------------------------|--------------------------------|---------------------|--------------------------------|
|               |                         |                          |                         |                          | All causes                               |                          | Due to diabetes   |                                | Due to hypertension |                                | Due to glomerulonephritis |                                | Due to other causes |                                |
|               | 2016 (UI)               | Percent change from 2002 | 2016 (UI)               | Percent change from 2002 | 2016 (UI)                                | Percent change from 2002 | 2016 (UI)         | Percent change from 2002 (PA*) | 2016 (UI)           | Percent change from 2002 (PA*) | 2016 (UI)                 | Percent change from 2002 (PA*) | 2016 (UI)           | Percent change from 2002 (PA*) |
| Missouri      | 26708<br>(24729, 28924) | 53.1                     | 439<br>(406, 475)       | 42.6                     | 304<br>(281, 329)                        | 25.5                     | 170<br>(151, 189) | 30<br>(63.6)                   | 60<br>(51, 71)      | 26.6<br>(20.3)                 | 29 (24, 34)               | 15.9 (6.4)                     | 46<br>(38, 55)      | 15.2<br>(9.8)                  |
| Montana       | 2847<br>(2522, 3187)    | 53.9                     | 275<br>(243, 307)       | 35.2                     | 182<br>(161, 203)                        | 17.1                     | 99<br>(86, 115)   | 21.3<br>(66)                   | 36<br>(30, 43)      | 17 (19.9)                      | 18 (15, 22)               | 10 (6.2)                       | 28<br>(23, 34)      | 8.1<br>(7.9)                   |
| Nebraska      | 6310<br>(5780, 6847)    | 47                       | 331<br>(303, 359)       | 33.3                     | 237<br>(216, 258)                        | 22.5                     | 130<br>(115, 145) | 25.8<br>(61.4)                 | 49<br>(41, 58)      | 26.6<br>(23.7)                 | 22 (18, 26)               | 13.3 (5.9)                     | 35<br>(29, 43)      | 12.4 (9)                       |
| Nevada        | 11471<br>(10418, 12532) | 65.2                     | 391<br>(355, 427)       | 22.2                     | 292<br>(264, 318)                        | 1.3                      | 164<br>(144, 184) | 4.2<br>(62.2)                  | 56<br>(48, 66)      | 0.9 (4.8)                      | 27 (22, 33)               | -3.6 (9.5)                     | 44<br>(36, 53)      | -5.4<br>(23.4)                 |
| New Hampshire | 3850<br>(3534, 4205)    | 63.7                     | 289<br>(265, 315)       | 55                       | 186<br>(171, 204)                        | 21.4                     | 101<br>(89, 113)  | 22.9<br>(57.2)                 | 39<br>(33, 47)      | 22.2<br>(21.7)                 | 18 (15, 21)               | 20.4 (9.2)                     | 28<br>(24, 34)      | 16.1<br>(11.9)                 |
| New Jersey    | 30964<br>(28134, 34145) | 21.3                     | 346<br>(314, 381)       | 15.6                     | 239<br>(217, 264)                        | 1.4                      | 133<br>(117, 150) | 2.9<br>(39.5)                  | 49<br>(41, 58)      | 5.7 (28)                       | 22 (18, 26)               | -4.5<br>(11.1)                 | 36<br>(29, 43)      | -5.4<br>(21.4)                 |
| New Mexico    | 7918<br>(6996, 8932)    | 86.8                     | 382<br>(338, 431)       | 67.3                     | 273<br>(241, 309)                        | 37.8                     | 153<br>(132, 176) | 43<br>(61.4)                   | 51<br>(42, 60)      | 38.3<br>(18.8)                 | 27 (22, 33)               | 28.5 (8)                       | 42<br>(34, 51)      | 26.5<br>(11.7)                 |

| Location       | YLL number              |                          | YLL per 100,000 persons |                          | Age-standardized YLL per 100,000 persons |                          |                   |                                |                     |                                |                           |                                |                     |                                |
|----------------|-------------------------|--------------------------|-------------------------|--------------------------|------------------------------------------|--------------------------|-------------------|--------------------------------|---------------------|--------------------------------|---------------------------|--------------------------------|---------------------|--------------------------------|
|                |                         |                          |                         |                          | All causes                               |                          | Due to diabetes   |                                | Due to hypertension |                                | Due to glomerulonephritis |                                | Due to other causes |                                |
|                | 2016 (UI)               | Percent change from 2002 | 2016 (UI)               | Percent change from 2002 | 2016 (UI)                                | Percent change from 2002 | 2016 (UI)         | Percent change from 2002 (PA*) | 2016 (UI)           | Percent change from 2002 (PA*) | 2016 (UI)                 | Percent change from 2002 (PA*) | 2016 (UI)           | Percent change from 2002 (PA*) |
| New York       | 56578<br>(50126, 63841) | 24.6                     | 286<br>(253, 322)       | 20.5                     | 201<br>(178, 228)                        | 4.7                      | 113<br>(97, 130)  | 6.1<br>(55.1)                  | 40<br>(33, 49)      | 10.8<br>(33.2)                 | 18 (15, 22)               | -2.7 (4.3)                     | 30<br>(24, 36)      | -2.8<br>(7.4)                  |
| North Carolina | 46975<br>(43242, 50588) | 69.1                     | 465<br>(428, 501)       | 39.4                     | 334<br>(308, 360)                        | 17.6                     | 189<br>(168, 209) | 21<br>(65.2)                   | 65<br>(55, 76)      | 19.4<br>(20.9)                 | 31 (25, 37)               | 10.1 (5.7)                     | 50<br>(41, 59)      | 8.9<br>(8.1)                   |
| North Dakota   | 2176<br>(1958, 2403)    | 49.8                     | 282<br>(254, 312)       | 24.1                     | 211<br>(189, 234)                        | 27.6                     | 116<br>(102, 131) | 31<br>(60.2)                   | 42<br>(35, 50)      | 29 (20.8)                      | 20 (17, 25)               | 20.9 (7.8)                     | 32<br>(27, 39)      | 18.8<br>(11.2)                 |
| Ohio           | 51811<br>(48162, 55915) | 44                       | 446<br>(415, 482)       | 41.5                     | 305<br>(283, 330)                        | 22.3                     | 171<br>(152, 189) | 25.8<br>(62.8)                 | 60<br>(50, 71)      | 22.8 (20)                      | 29 (23, 34)               | 16.1 (7.2)                     | 46<br>(38, 54)      | 14<br>(10.1)                   |
| Oklahoma       | 17021<br>(15729, 18512) | 70.4                     | 435<br>(402, 473)       | 51.9                     | 325<br>(300, 354)                        | 40                       | 183<br>(164, 202) | 46<br>(61.9)                   | 62<br>(52, 73)      | 39.7<br>(18.8)                 | 31 (26, 38)               | 29.1 (7.6)                     | 50<br>(42, 59)      | 27.9<br>(11.6)                 |
| Oregon         | 11423<br>(10511, 12436) | 69.3                     | 283<br>(260, 308)       | 46.9                     | 187<br>(172, 203)                        | 23.4                     | 103<br>(91, 115)  | 26.7<br>(61.3)                 | 39<br>(33, 46)      | 27.3<br>(23.8)                 | 17 (14, 20)               | 13.9 (5.8)                     | 27<br>(23, 33)      | 13.3<br>(9.1)                  |
| Pennsylvania   | 55315<br>(51280, 59991) | 26.2                     | 433<br>(402, 470)       | 21.7                     | 276<br>(256, 299)                        | 10.2                     | 154<br>(137, 171) | 12.6<br>(67.6)                 | 56<br>(47, 66)      | 13.4 (26)                      | 25 (21, 30)               | 3 (2.9)                        | 41<br>(34, 49)      | 2.2<br>(3.5)                   |

| Location       | YLL number                |                          | YLL per 100,000 persons |                          | Age-standardized YLL per 100,000 persons |                          |                   |                                |                     |                                |                           |                                |                     |                                |
|----------------|---------------------------|--------------------------|-------------------------|--------------------------|------------------------------------------|--------------------------|-------------------|--------------------------------|---------------------|--------------------------------|---------------------------|--------------------------------|---------------------|--------------------------------|
|                |                           |                          |                         |                          | All causes                               |                          | Due to diabetes   |                                | Due to hypertension |                                | Due to glomerulonephritis |                                | Due to other causes |                                |
|                | 2016 (UI)                 | Percent change from 2002 | 2016 (UI)               | Percent change from 2002 | 2016 (UI)                                | Percent change from 2002 | 2016 (UI)         | Percent change from 2002 (PA*) | 2016 (UI)           | Percent change from 2002 (PA*) | 2016 (UI)                 | Percent change from 2002 (PA*) | 2016 (UI)           | Percent change from 2002 (PA*) |
| Rhode Island   | 3143<br>(2790, 3508)      | 30.7                     | 298<br>(264, 332)       | 31.6                     | 196<br>(174, 220)                        | 17.1                     | 109<br>(94, 125)  | 19<br>(60.6)                   | 40<br>(33, 48)      | 22.7<br>(25.9)                 | 18 (14, 22)               | 9.2 (5.4)                      | 29<br>(24, 35)      | 8.6<br>(8.1)                   |
| South Carolina | 26010<br>(23399, 29053)   | 65.9                     | 527<br>(474, 589)       | 38                       | 367<br>(331, 410)                        | 13.6                     | 207<br>(182, 236) | 16.2<br>(65.5)                 | 70<br>(59, 84)      | 17.9<br>(24.1)                 | 35 (28, 42)               | 5.9 (4.4)                      | 55<br>(45, 66)      | 5 (6)                          |
| South Dakota   | 2523<br>(2287, 2804)      | 54.2                     | 292<br>(264, 324)       | 35.6                     | 205<br>(185, 227)                        | 25.9                     | 112<br>(99, 127)  | 30.6<br>(62.5)                 | 40<br>(33, 47)      | 26.1<br>(19.5)                 | 21 (17, 25)               | 17.8 (7.4)                     | 32<br>(27, 39)      | 16.1<br>(10.6)                 |
| Tennessee      | 30007<br>(27455, 32264)   | 77.1                     | 453<br>(414, 487)       | 54.9                     | 325<br>(297, 349)                        | 33.3                     | 183<br>(161, 202) | 38.1<br>(62.2)                 | 62<br>(52, 73)      | 37.2<br>(20.8)                 | 31 (25, 37)               | 20.5 (6.5)                     | 49<br>(41, 58)      | 21<br>(10.5)                   |
| Texas          | 105665<br>(96757, 114918) | 102.9                    | 379<br>(347, 413)       | 58.5                     | 323<br>(296, 351)                        | 36.2                     | 183<br>(163, 203) | 41.1<br>(62.1)                 | 63<br>(54, 75)      | 39.8<br>(20.8)                 | 30 (24, 35)               | 23.2 (6.5)                     | 48<br>(39, 57)      | 23.7<br>(10.6)                 |
| Utah           | 6898<br>(6363, 7478)      | 91.9                     | 228<br>(210, 247)       | 48.3                     | 221<br>(203, 239)                        | 27.9                     | 121<br>(107, 135) | 31.2<br>(59.7)                 | 47<br>(39, 55)      | 31.4<br>(23.3)                 | 20 (17, 24)               | 18.9 (6.6)                     | 33<br>(27, 39)      | 17.9<br>(10.3)                 |
| Vermont        | 1672<br>(1528, 1845)      | 46.4                     | 268<br>(245, 295)       | 43.8                     | 168<br>(154, 185)                        | 16                       | 91<br>(80, 103)   | 17.5<br>(58.4)                 | 35<br>(30, 42)      | 18.3<br>(23.5)                 | 16 (13, 19)               | 13 (8)                         | 26<br>(21, 30)      | 10.1<br>(10.1)                 |



| Location      | YLL number              |                          | YLL per 100,000 persons |                          | Age-standardized YLL per 100,000 persons |                          |                   |                                |                     |                                |                           |                                |                     |                                |
|---------------|-------------------------|--------------------------|-------------------------|--------------------------|------------------------------------------|--------------------------|-------------------|--------------------------------|---------------------|--------------------------------|---------------------------|--------------------------------|---------------------|--------------------------------|
|               |                         |                          |                         |                          | All causes                               |                          | Due to diabetes   |                                | Due to hypertension |                                | Due to glomerulonephritis |                                | Due to other causes |                                |
|               | 2016 (UI)               | Percent change from 2002 | 2016 (UI)               | Percent change from 2002 | 2016 (UI)                                | Percent change from 2002 | 2016 (UI)         | Percent change from 2002 (PA*) | 2016 (UI)           | Percent change from 2002 (PA*) | 2016 (UI)                 | Percent change from 2002 (PA*) | 2016 (UI)           | Percent change from 2002 (PA*) |
| Virginia      | 33663<br>(30988, 36495) | 54.3                     | 400<br>(368, 433)       | 33.4                     | 294<br>(271, 319)                        | 11.9                     | 164<br>(146, 183) | 14.6<br>(66.7)                 | 60<br>(50, 71)      | 16 (26.3)                      | 27 (22, 32)               | 3.4 (2.8)                      | 44<br>(36, 52)      | 3.1<br>(4.2)                   |
| Washington    | 17273<br>(15926, 18664) | 95.3                     | 239<br>(221, 259)       | 63.5                     | 172<br>(158, 186)                        | 36.3                     | 95<br>(84, 106)   | 40.1<br>(59.2)                 | 37<br>(31, 43)      | 42.6<br>(23.7)                 | 15 (13, 18)               | 23.5 (6.4)                     | 25<br>(21, 30)      | 23.8<br>(10.6)                 |
| West Virginia | 11405<br>(10513, 12400) | 55.1                     | 623<br>(574, 677)       | 52.8                     | 397<br>(366, 432)                        | 36.4                     | 222<br>(199, 248) | 41.2<br>(61.2)                 | 76<br>(64, 91)      | 36.4<br>(19.2)                 | 38 (31, 46)               | 27.3 (7.8)                     | 60<br>(50, 72)      | 26.3<br>(11.9)                 |
| Wisconsin     | 20410<br>(18823, 22012) | 55.6                     | 354<br>(326, 381)       | 46.5                     | 236<br>(217, 254)                        | 24.9                     | 128<br>(114, 143) | 27.7<br>(59.3)                 | 50<br>(43, 59)      | 29.3<br>(24.3)                 | 22 (18, 26)               | 16.3 (6.5)                     | 35<br>(29, 42)      | 15.3<br>(9.9)                  |
| Wyoming       | 1496<br>(1341, 1671)    | 57.1                     | 256<br>(229, 286)       | 34.2                     | 192<br>(172, 215)                        | 18.3                     | 106<br>(92, 121)  | 22.8<br>(66.2)                 | 38<br>(31, 45)      | 19.7<br>(20.9)                 | 19 (15, 22)               | 9.1 (5.3)                      | 29<br>(24, 35)      | 8.2<br>(7.6)                   |

YLL: Years of Life Lost  
 UI is the uncertainty interval, it reflects the certainty of an estimate based on data availability, studies size and consistency across data sources  
 \*Percentage attributed to overall rate is the proportion of overall age-standardized rate change attributed by each of the following four causes: diabetes, hypertension, glomerulonephritis and other causes

**eTable 5b:** Number and age-standardized rate for overall YLL due to CKD and by cause in females, with percentage change from 2002 to 2016 for the United States and by state and district.

| Location      | YLL number                 |                          | YLL per 100,000 persons |                          | Age-standardized YLL per 100,000 persons |                          |                   |                                |                     |                                |                           |                                |                     |                                |
|---------------|----------------------------|--------------------------|-------------------------|--------------------------|------------------------------------------|--------------------------|-------------------|--------------------------------|---------------------|--------------------------------|---------------------------|--------------------------------|---------------------|--------------------------------|
|               |                            |                          |                         |                          | All causes                               |                          | Due to diabetes   |                                | Due to hypertension |                                | Due to glomerulonephritis |                                | Due to other causes |                                |
|               | 2016 (UI)                  | Percent change from 2002 | 2016 (UI)               | Percent change from 2002 | 2016 (UI)                                | Percent change from 2002 | 2016 (UI)         | Percent change from 2002 (PA*) | 2016 (UI)           | Percent change from 2002 (PA*) | 2016 (UI)                 | Percent change from 2002 (PA*) | 2016 (UI)           | Percent change from 2002 (PA*) |
| United States | 566633<br>(543974, 587975) | 50.2                     | 346<br>(332, 359)       | 34.1                     | 231<br>(222, 239)                        | 18.4                     | 124<br>(113, 134) | 21.1<br>(60.4)                 | 47<br>(40, 55)      | 23.1<br>(24.6)                 | 24 (20, 29)               | 9.9 (6.1)                      | 36<br>(30, 42)      | 9.9 (9)                        |
| Alabama       | 13581<br>(11490, 15855)    | 43.1                     | 541<br>(458, 632)       | 32.1                     | 364<br>(308, 427)                        | 20.8                     | 197<br>(162, 236) | 25.1 (63)                      | 69<br>(55, 86)      | 19.6 (18)                      | 41 (32, 51)               | 14.4 (8.2)                     | 58<br>(46, 72)      | 13.3<br>(10.8)                 |
| Alaska        | 718<br>(595, 855)          | 83.1                     | 207<br>(171, 246)       | 64.1                     | 187<br>(155, 222)                        | 25.1                     | 98<br>(80, 118)   | 27.7<br>(56.7)                 | 38<br>(30, 47)      | 32.1<br>(24.5)                 | 21 (16, 27)               | 15.8 (7.7)                     | 30<br>(24, 37)      | 16.1<br>(11.1)                 |
| Arizona       | 10046<br>(8706, 11461)     | 74.9                     | 289<br>(250, 329)       | 36                       | 192<br>(167, 218)                        | 17                       | 103<br>(88, 121)  | 20.2<br>(62.4)                 | 38<br>(30, 46)      | 18.4<br>(20.9)                 | 21 (16, 25)               | 10.7 (7.2)                     | 30<br>(24, 36)      | 9.6 (9.4)                      |
| Arkansas      | 7554<br>(6572, 8548)       | 57.5                     | 500<br>(435, 565)       | 44                       | 334<br>(290, 379)                        | 34.5                     | 181<br>(153, 210) | 39.4<br>(59.6)                 | 64<br>(52, 77)      | 38.3<br>(20.6)                 | 37 (29, 46)               | 23 (8.1)                       | 53<br>(43, 65)      | 23.6<br>(11.7)                 |
| California    | 49664<br>(41760, 58188)    | 67.1                     | 250<br>(210, 293)       | 47.6                     | 178<br>(149, 209)                        | 22.7                     | 96<br>(80, 117)   | 24.8<br>(58.1)                 | 37<br>(29, 46)      | 33.6<br>(28.2)                 | 18 (14, 23)               | 10.1 (5)                       | 27<br>(21, 34)      | 12 (8.7)                       |

| Location             | YLL number              |                          | YLL per 100,000 persons |                          | Age-standardized YLL per 100,000 persons |                          |                   |                                |                     |                                |                           |                                |                     |                                |
|----------------------|-------------------------|--------------------------|-------------------------|--------------------------|------------------------------------------|--------------------------|-------------------|--------------------------------|---------------------|--------------------------------|---------------------------|--------------------------------|---------------------|--------------------------------|
|                      |                         |                          |                         |                          | All causes                               |                          | Due to diabetes   |                                | Due to hypertension |                                | Due to glomerulonephritis |                                | Due to other causes |                                |
|                      | 2016 (UI)               | Percent change from 2002 | 2016 (UI)               | Percent change from 2002 | 2016 (UI)                                | Percent change from 2002 | 2016 (UI)         | Percent change from 2002 (PA*) | 2016 (UI)           | Percent change from 2002 (PA*) | 2016 (UI)                 | Percent change from 2002 (PA*) | 2016 (UI)           | Percent change from 2002 (PA*) |
| Colorado             | 5782<br>(5141, 6580)    | 58.2                     | 211<br>(188, 240)       | 28.7                     | 152<br>(135, 174)                        | 6.5                      | 80<br>(68, 93)    | 8.2<br>(64.9)                  | 33<br>(27, 40)      | 10.2<br>(32.6)                 | 16 (13, 20)               | 1.3 (2.2)                      | 24<br>(19, 29)      | 0.1 (0.3)                      |
| Connecticut          | 4774<br>(3995, 5630)    | 20.3                     | 261<br>(218, 307)       | 16.4                     | 157<br>(131, 185)                        | 3.5                      | 83<br>(67, 99)    | 3.8<br>(45.1)                  | 33<br>(27, 41)      | 9.9 (45.2)                     | 16 (13, 21)               | -1.1 (2.8)                     | 24<br>(19, 30)      | -1.9<br>(6.9)                  |
| Delaware             | 1835<br>(1617, 2069)    | 68.4                     | 374<br>(329, 421)       | 42.1                     | 235<br>(206, 264)                        | 19.9                     | 126<br>(108, 145) | 22.7<br>(59.8)                 | 46<br>(38, 55)      | 22 (21.4)                      | 26 (21, 32)               | 14.5 (8.4)                     | 37<br>(30, 45)      | 12.3<br>(10.5)                 |
| District of Columbia | 1184<br>(992, 1403)     | -1.6                     | 330<br>(276, 391)       | -16                      | 280<br>(235, 333)                        | -11.7                    | 156<br>(127, 187) | -9.2<br>(42.4)                 | 52<br>(41, 65)      | -4.2 (6.1)                     | 30 (23, 37)               | -22.3<br>(22.8)                | 43<br>(33, 55)      | -19.8<br>(28.7)                |
| Florida              | 33800<br>(29400, 38765) | 63.4                     | 323<br>(281, 371)       | 33.4                     | 188<br>(164, 217)                        | 21.3                     | 102<br>(87, 120)  | 26.1<br>(63.9)                 | 36<br>(29, 43)      | 24.6<br>(21.4)                 | 21 (16, 26)               | 10 (5.6)                       | 30<br>(24, 36)      | 11.2 (9)                       |
| Georgia              | 23321<br>(19621, 27487) | 55.9                     | 442<br>(372, 521)       | 28.1                     | 330<br>(278, 390)                        | 7.5                      | 178<br>(147, 212) | 9.3<br>(65.9)                  | 67<br>(53, 83)      | 12.9<br>(33.1)                 | 35 (27, 43)               | 0.3 (0.5)                      | 51<br>(41, 64)      | 0.2 (0.4)                      |
| Hawaii               | 2023<br>(1773, 2285)    | 69.2                     | 285<br>(250, 322)       | 47.7                     | 176<br>(154, 199)                        | 23.7                     | 96<br>(82, 111)   | 27.7<br>(61.4)                 | 35<br>(28, 42)      | 27.4<br>(22.1)                 | 19 (15, 23)               | 13.7 (6.7)                     | 27<br>(22, 33)      | 13.8<br>(9.8)                  |

| Location  | YLL number              |                          | YLL per 100,000 persons |                          | Age-standardized YLL per 100,000 persons |                          |                   |                                |                     |                                |                           |                                |                     |                                |
|-----------|-------------------------|--------------------------|-------------------------|--------------------------|------------------------------------------|--------------------------|-------------------|--------------------------------|---------------------|--------------------------------|---------------------------|--------------------------------|---------------------|--------------------------------|
|           |                         |                          |                         |                          | All causes                               |                          | Due to diabetes   |                                | Due to hypertension |                                | Due to glomerulonephritis |                                | Due to other causes |                                |
|           | 2016 (UI)               | Percent change from 2002 | 2016 (UI)               | Percent change from 2002 | 2016 (UI)                                | Percent change from 2002 | 2016 (UI)         | Percent change from 2002 (PA*) | 2016 (UI)           | Percent change from 2002 (PA*) | 2016 (UI)                 | Percent change from 2002 (PA*) | 2016 (UI)           | Percent change from 2002 (PA*) |
| Idaho     | 2154<br>(1844, 2511)    | 96.1                     | 258<br>(221, 300)       | 56.6                     | 179<br>(153, 209)                        | 35.2                     | 94<br>(78, 113)   | 37.7<br>(55.2)                 | 38<br>(30, 47)      | 41.7<br>(24.2)                 | 19 (15, 23)               | 26 (8.3)                       | 28<br>(22, 35)      | 25.8<br>(12.2)                 |
| Illinois  | 23564<br>(20935, 26618) | 25.2                     | 361<br>(320, 407)       | 22.5                     | 240<br>(213, 272)                        | 6.7                      | 128<br>(110, 149) | 8.1<br>(57.4)                  | 50<br>(41, 61)      | 14.4<br>(37.8)                 | 25 (20, 30)               | -1.6 (2.4)                     | 37<br>(30, 45)      | -1.1<br>(2.4)                  |
| Indiana   | 14760<br>(12486, 17444) | 53.1                     | 439<br>(371, 519)       | 42.5                     | 293<br>(248, 347)                        | 28.7                     | 156<br>(128, 192) | 31.7<br>(57.4)                 | 61<br>(49, 76)      | 32.1<br>(22.6)                 | 31 (24, 39)               | 21.4 (8.4)                     | 46<br>(36, 57)      | 20<br>(11.6)                   |
| Iowa      | 4212<br>(3671, 4778)    | 54.4                     | 267<br>(233, 303)       | 45.9                     | 160<br>(139, 182)                        | 38.6                     | 85<br>(71, 99)    | 42.2<br>(56.3)                 | 34<br>(28, 42)      | 46.5<br>(24.5)                 | 17 (13, 20)               | 25.4 (7.5)                     | 25<br>(20, 30)      | 26.9<br>(11.7)                 |
| Kansas    | 5214<br>(4437, 6181)    | 38.8                     | 358<br>(304, 424)       | 30.5                     | 237<br>(199, 282)                        | 23.4                     | 127<br>(104, 154) | 27 (60)                        | 49<br>(38, 61)      | 24.2<br>(21.1)                 | 25 (19, 31)               | 17 (8)                         | 37<br>(29, 47)      | 15.4<br>(10.9)                 |
| Kentucky  | 10839<br>(9601, 12134)  | 57.5                     | 482<br>(427, 540)       | 46.3                     | 320<br>(283, 358)                        | 30.9                     | 172<br>(148, 199) | 34.9<br>(58.8)                 | 64<br>(52, 78)      | 32.2<br>(20.7)                 | 34 (28, 42)               | 23.1 (8.5)                     | 50<br>(41, 60)      | 22.3<br>(12)                   |
| Louisiana | 14586<br>(12841, 16390) | 37                       | 610<br>(537, 685)       | 32.7                     | 437<br>(385, 492)                        | 16.8                     | 237<br>(203, 273) | 19.4<br>(61.1)                 | 83<br>(68, 101)     | 21.4<br>(23.4)                 | 48 (38, 58)               | 9.4 (6.5)                      | 69<br>(55, 83)      | 9 (9)                          |

| Location      | YLL number              |                          | YLL per 100,000 persons |                          | Age-standardized YLL per 100,000 persons |                          |                   |                                |                     |                                |                           |                                |                     |                                |
|---------------|-------------------------|--------------------------|-------------------------|--------------------------|------------------------------------------|--------------------------|-------------------|--------------------------------|---------------------|--------------------------------|---------------------------|--------------------------------|---------------------|--------------------------------|
|               |                         |                          |                         |                          | All causes                               |                          | Due to diabetes   |                                | Due to hypertension |                                | Due to glomerulonephritis |                                | Due to other causes |                                |
|               | 2016 (UI)               | Percent change from 2002 | 2016 (UI)               | Percent change from 2002 | 2016 (UI)                                | Percent change from 2002 | 2016 (UI)         | Percent change from 2002 (PA*) | 2016 (UI)           | Percent change from 2002 (PA*) | 2016 (UI)                 | Percent change from 2002 (PA*) | 2016 (UI)           | Percent change from 2002 (PA*) |
| Maine         | 2398<br>(2127, 2668)    | 38.5                     | 354<br>(314, 394)       | 35.5                     | 192<br>(171, 214)                        | 13.6                     | 100<br>(86, 115)  | 15.5<br>(58.3)                 | 42<br>(34, 50)      | 17.1<br>(26.3)                 | 20 (16, 25)               | 7.9 (6.5)                      | 30<br>(24, 36)      | 7.3 (8.9)                      |
| Maryland      | 9872<br>(8776, 11104)   | 37.3                     | 318<br>(282, 357)       | 24.2                     | 217<br>(193, 244)                        | 5.8                      | 116<br>(100, 134) | 7.5<br>(61.4)                  | 44<br>(35, 53)      | 11.4<br>(33.7)                 | 23 (18, 28)               | -1.1 (2)                       | 34<br>(27, 41)      | -1.1<br>(2.8)                  |
| Massachusetts | 9884<br>(8650, 11212)   | 17.6                     | 281<br>(246, 319)       | 10.9                     | 173<br>(151, 197)                        | 1.7                      | 91<br>(77, 107)   | 2.5<br>(40.5)                  | 38<br>(31, 46)      | 5.5 (36.5)                     | 18 (14, 22)               | -1.8 (6.2)                     | 27<br>(21, 33)      | -3.3<br>(16.8)                 |
| Michigan      | 19003<br>(16903, 21162) | 36.5                     | 377<br>(335, 420)       | 38                       | 237<br>(211, 264)                        | 16                       | 127<br>(109, 144) | 18 (59)                        | 49<br>(40, 59)      | 19.6<br>(24.4)                 | 25 (20, 30)               | 10.4 (7.2)                     | 37<br>(30, 45)      | 9 (9.3)                        |
| Minnesota     | 7487<br>(6610, 8466)    | 51.6                     | 270<br>(239, 306)       | 38.3                     | 171<br>(150, 193)                        | 23.2                     | 88<br>(75, 103)   | 26.3<br>(57.2)                 | 39<br>(31, 47)      | 26.8<br>(25.4)                 | 18 (14, 22)               | 14.5 (6.9)                     | 26<br>(21, 33)      | 14.7<br>(10.5)                 |
| Mississippi   | 9739<br>(8082, 11324)   | 46.7                     | 632<br>(525, 735)       | 40.5                     | 446<br>(369, 522)                        | 24.8                     | 242<br>(197, 290) | 29.2<br>(61.8)                 | 83<br>(65, 102)     | 28.7<br>(20.9)                 | 50 (39, 62)               | 14.2 (7)                       | 71<br>(55, 88)      | 14.7<br>(10.3)                 |
| Missouri      | 12507<br>(11117, 13905) | 47.8                     | 404<br>(359, 449)       | 38.7                     | 258<br>(228, 288)                        | 25.8                     | 138<br>(120, 158) | 30.3<br>(60.6)                 | 52<br>(43, 63)      | 27.7<br>(21.4)                 | 27 (22, 33)               | 16.6 (7.4)                     | 40<br>(32, 48)      | 16.3<br>(10.6)                 |

| Location      | YLL number              |                          | YLL per 100,000 persons |                          | Age-standardized YLL per 100,000 persons |                          |                   |                                |                     |                                |                           |                                |                     |                                |
|---------------|-------------------------|--------------------------|-------------------------|--------------------------|------------------------------------------|--------------------------|-------------------|--------------------------------|---------------------|--------------------------------|---------------------------|--------------------------------|---------------------|--------------------------------|
|               |                         |                          |                         |                          | All causes                               |                          | Due to diabetes   |                                | Due to hypertension |                                | Due to glomerulonephritis |                                | Due to other causes |                                |
|               | 2016 (UI)               | Percent change from 2002 | 2016 (UI)               | Percent change from 2002 | 2016 (UI)                                | Percent change from 2002 | 2016 (UI)         | Percent change from 2002 (PA*) | 2016 (UI)           | Percent change from 2002 (PA*) | 2016 (UI)                 | Percent change from 2002 (PA*) | 2016 (UI)           | Percent change from 2002 (PA*) |
| Montana       | 1338<br>(1142, 1560)    | 51.9                     | 260<br>(222, 303)       | 34.4                     | 162<br>(138, 190)                        | 19.6                     | 85<br>(70, 103)   | 22.8<br>(59.5)                 | 33<br>(26, 41)      | 21.9<br>(22.5)                 | 18 (14, 22)               | 13.3 (8)                       | 26<br>(20, 32)      | 11.6<br>(10.1)                 |
| Nebraska      | 3026<br>(2687, 3390)    | 44.6                     | 317<br>(282, 355)       | 32.6                     | 208<br>(184, 234)                        | 24.7                     | 110<br>(94, 127)  | 27.9<br>(58.3)                 | 44<br>(36, 53)      | 31.1<br>(25.3)                 | 22 (17, 27)               | 13.8 (6.4)                     | 32<br>(26, 39)      | 14.7<br>(10)                   |
| Nevada        | 4762<br>(4135, 5388)    | 63.7                     | 326<br>(283, 368)       | 19.4                     | 232<br>(201, 262)                        | 0.7                      | 125<br>(105, 145) | 3.3<br>(51.2)                  | 47<br>(38, 56)      | 1.4 (8.5)                      | 25 (20, 30)               | -4.3<br>(14.2)                 | 36<br>(29, 44)      | -5.4<br>(26.1)                 |
| New Hampshire | 1748<br>(1555, 1979)    | 51.2                     | 259<br>(231, 294)       | 43.6                     | 155<br>(137, 176)                        | 16                       | 80<br>(69, 93)    | 16.3<br>(52.7)                 | 34<br>(27, 40)      | 17.9<br>(23.8)                 | 17 (14, 21)               | 16.7<br>(11.2)                 | 24<br>(20, 30)      | 12.1<br>(12.3)                 |
| New Jersey    | 13776<br>(11983, 15639) | 15.3                     | 301<br>(262, 341)       | 10.4                     | 189<br>(164, 216)                        | -1.3                     | 101<br>(85, 119)  | 0 (0.8)                        | 40<br>(32, 49)      | 3.7 (26)                       | 20 (16, 24)               | -7.6<br>(29.6)                 | 29<br>(23, 36)      | -7.6<br>(43.6)                 |
| New Mexico    | 3645<br>(3048, 4350)    | 90.4                     | 349<br>(292, 416)       | 71.8                     | 233<br>(194, 278)                        | 42.1                     | 125<br>(102, 153) | 46.8<br>(57.8)                 | 45<br>(36, 55)      | 42.8<br>(19.6)                 | 26 (20, 33)               | 34.2 (9.6)                     | 37<br>(29, 46)      | 32.2<br>(13)                   |
| New York      | 25781<br>(21532, 30200) | 20                       | 253<br>(211, 296)       | 16.8                     | 164<br>(135, 194)                        | 3.3                      | 88<br>(72, 108)   | 4.3<br>(44.4)                  | 34<br>(26, 42)      | 10.2<br>(38.1)                 | 17 (13, 21)               | -3.3 (7.2)                     | 25<br>(20, 32)      | -3.2<br>(10.2)                 |

| Location       | YLL number              |                          | YLL per 100,000 persons |                          | Age-standardized YLL per 100,000 persons |                          |                   |                                |                     |                                |                           |                                |                     |                                |
|----------------|-------------------------|--------------------------|-------------------------|--------------------------|------------------------------------------|--------------------------|-------------------|--------------------------------|---------------------|--------------------------------|---------------------------|--------------------------------|---------------------|--------------------------------|
|                |                         |                          |                         |                          | All causes                               |                          | Due to diabetes   |                                | Due to hypertension |                                | Due to glomerulonephritis |                                | Due to other causes |                                |
|                | 2016 (UI)               | Percent change from 2002 | 2016 (UI)               | Percent change from 2002 | 2016 (UI)                                | Percent change from 2002 | 2016 (UI)         | Percent change from 2002 (PA*) | 2016 (UI)           | Percent change from 2002 (PA*) | 2016 (UI)                 | Percent change from 2002 (PA*) | 2016 (UI)           | Percent change from 2002 (PA*) |
| North Carolina | 22836<br>(20204, 25387) | 64.8                     | 440<br>(390, 489)       | 35.1                     | 295<br>(261, 327)                        | 18.6                     | 160<br>(138, 183) | 22.1<br>(62.8)                 | 58<br>(48, 70)      | 20.4<br>(21.4)                 | 31 (25, 38)               | 10.8 (6.6)                     | 45<br>(37, 55)      | 10.4<br>(9.3)                  |
| North Dakota   | 976<br>(841, 1131)      | 41.9                     | 260<br>(224, 302)       | 20.8                     | 176<br>(149, 206)                        | 26.1                     | 93<br>(78, 111)   | 30.1 (59)                      | 36<br>(28, 44)      | 28.7 (22)                      | 19 (15, 24)               | 16.8 (7.6)                     | 28<br>(22, 34)      | 17.4<br>(11.3)                 |
| Ohio           | 24822<br>(22458, 27481) | 37.8                     | 419<br>(379, 464)       | 36.4                     | 264<br>(239, 294)                        | 20.7                     | 142<br>(124, 161) | 23 (58.4)                      | 54<br>(44, 65)      | 24.4<br>(23.3)                 | 28 (23, 34)               | 14.7 (7.9)                     | 41<br>(33, 50)      | 13.1<br>(10.4)                 |
| Oklahoma       | 8229<br>(7319, 9256)    | 67.1                     | 417<br>(371, 469)       | 49.7                     | 290<br>(258, 327)                        | 42.5                     | 157<br>(135, 181) | 48.1<br>(58.8)                 | 57<br>(46, 68)      | 44.2 (20)                      | 32 (25, 39)               | 31.3 (8.7)                     | 46<br>(37, 55)      | 31<br>(12.5)                   |
| Oregon         | 5313<br>(4740, 5907)    | 61.2                     | 260<br>(232, 290)       | 39.7                     | 160<br>(142, 179)                        | 20.3                     | 84<br>(73, 97)    | 22.4<br>(57.5)                 | 34<br>(28, 41)      | 25.4 (26)                      | 16 (13, 20)               | 12.6 (6.8)                     | 24<br>(20, 29)      | 12 (9.7)                       |
| Pennsylvania   | 25851<br>(23097, 28792) | 22.6                     | 397<br>(354, 442)       | 19.4                     | 231<br>(204, 258)                        | 10.6                     | 123<br>(107, 140) | 12.3<br>(60.9)                 | 48<br>(40, 58)      | 15.3 (29)                      | 24 (19, 29)               | 4.2 (4.5)                      | 36<br>(29, 44)      | 3.6 (5.7)                      |
| Rhode Island   | 1455<br>(1240, 1694)    | 30.9                     | 268<br>(228, 311)       | 32.7                     | 160<br>(136, 187)                        | 19.6                     | 85<br>(71, 103)   | 20.9<br>(56.1)                 | 34<br>(27, 42)      | 28.6<br>(28.8)                 | 16 (13, 20)               | 10 (5.7)                       | 24<br>(19, 30)      | 11.2<br>(9.4)                  |

| Location       | YLL number              |                          | YLL per 100,000 persons |                          | Age-standardized YLL per 100,000 persons |                          |                   |                                |                     |                                |                           |                                |                     |                                |
|----------------|-------------------------|--------------------------|-------------------------|--------------------------|------------------------------------------|--------------------------|-------------------|--------------------------------|---------------------|--------------------------------|---------------------------|--------------------------------|---------------------|--------------------------------|
|                |                         |                          |                         |                          | All causes                               |                          | Due to diabetes   |                                | Due to hypertension |                                | Due to glomerulonephritis |                                | Due to other causes |                                |
|                | 2016 (UI)               | Percent change from 2002 | 2016 (UI)               | Percent change from 2002 | 2016 (UI)                                | Percent change from 2002 | 2016 (UI)         | Percent change from 2002 (PA*) | 2016 (UI)           | Percent change from 2002 (PA*) | 2016 (UI)                 | Percent change from 2002 (PA*) | 2016 (UI)           | Percent change from 2002 (PA*) |
| South Carolina | 12760<br>(10748, 15107) | 65.7                     | 503<br>(424, 596)       | 37.8                     | 328<br>(276, 387)                        | 16.8                     | 177<br>(146, 216) | 19.4 (61)                      | 65<br>(51, 81)      | 21.9<br>(24.7)                 | 35 (27, 44)               | 8.8 (6)                        | 51<br>(39, 64)      | 8.4 (8.3)                      |
| South Dakota   | 1212<br>(1043, 1418)    | 55.6                     | 282<br>(243, 330)       | 38.6                     | 185<br>(158, 217)                        | 31.1                     | 98<br>(82, 117)   | 35.8<br>(58.9)                 | 36<br>(29, 45)      | 34.1<br>(20.9)                 | 21 (17, 26)               | 21.1 (8.4)                     | 30<br>(24, 37)      | 20.9<br>(11.8)                 |
| Tennessee      | 14520<br>(12854, 16212) | 72.2                     | 428<br>(379, 478)       | 50.7                     | 286<br>(252, 319)                        | 33.8                     | 154<br>(132, 176) | 38.4<br>(59.1)                 | 57<br>(46, 69)      | 40 (22.4)                      | 31 (25, 37)               | 20.7 (7.3)                     | 44<br>(36, 54)      | 22.2<br>(11.2)                 |
| Texas          | 50172<br>(44323, 56834) | 95.3                     | 358<br>(316, 406)       | 52.5                     | 285<br>(252, 323)                        | 34.4                     | 155<br>(132, 179) | 38.5<br>(59.1)                 | 57<br>(47, 70)      | 40.9<br>(22.8)                 | 29 (23, 36)               | 21.3 (7.1)                     | 43<br>(34, 54)      | 22.9<br>(11.1)                 |
| Utah           | 3222<br>(2871, 3605)    | 90.3                     | 214<br>(191, 239)       | 47.3                     | 195<br>(173, 218)                        | 29.9                     | 103<br>(88, 119)  | 32.3<br>(55.8)                 | 43<br>(35, 52)      | 35.5<br>(24.9)                 | 20 (16, 25)               | 21.5 (7.8)                     | 30<br>(24, 36)      | 21.1<br>(11.5)                 |
| Vermont        | 801<br>(698, 904)       | 36.6                     | 253<br>(220, 285)       | 34.5                     | 147<br>(128, 166)                        | 11.2                     | 76<br>(65, 88)    | 11.4 (53)                      | 31<br>(25, 38)      | 14.7<br>(27.2)                 | 16 (13, 20)               | 10 (10)                        | 23<br>(19, 28)      | 6.7 (9.9)                      |
| Virginia       | 16059<br>(14250, 18025) | 51.9                     | 376<br>(333, 422)       | 31.9                     | 256<br>(227, 287)                        | 13                       | 137<br>(117, 157) | 15.4<br>(62.4)                 | 53<br>(44, 65)      | 18.2<br>(27.9)                 | 26 (21, 32)               | 4.2 (3.6)                      | 39<br>(32, 48)      | 4.8 (6.1)                      |



| Location      | YLL number            |                          | YLL per 100,000 persons |                          | Age-standardized YLL per 100,000 persons |                          |                   |                                |                     |                                |                           |                                |                     |                                |
|---------------|-----------------------|--------------------------|-------------------------|--------------------------|------------------------------------------|--------------------------|-------------------|--------------------------------|---------------------|--------------------------------|---------------------------|--------------------------------|---------------------|--------------------------------|
|               |                       |                          |                         |                          | All causes                               |                          | Due to diabetes   |                                | Due to hypertension |                                | Due to glomerulonephritis |                                | Due to other causes |                                |
|               | 2016 (UI)             | Percent change from 2002 | 2016 (UI)               | Percent change from 2002 | 2016 (UI)                                | Percent change from 2002 | 2016 (UI)         | Percent change from 2002 (PA*) | 2016 (UI)           | Percent change from 2002 (PA*) | 2016 (UI)                 | Percent change from 2002 (PA*) | 2016 (UI)           | Percent change from 2002 (PA*) |
| Washington    | 8118<br>(7194, 9102)  | 86.8                     | 225<br>(200, 253)       | 57.2                     | 150<br>(133, 169)                        | 33.3                     | 79<br>(68, 91)    | 36 (56.1)                      | 32<br>(26, 39)      | 40.7 (25)                      | 15 (12, 19)               | 22.9 (7.6)                     | 23<br>(18, 28)      | 22.8<br>(11.3)                 |
| West Virginia | 5343<br>(4746, 6029)  | 44.5                     | 576<br>(512, 651)       | 43.8                     | 346<br>(307, 389)                        | 33.9                     | 186<br>(160, 212) | 38.2<br>(58.7)                 | 68<br>(55, 83)      | 34.7 (20)                      | 38 (30, 46)               | 26 (8.9)                       | 54<br>(44, 66)      | 24.9<br>(12.4)                 |
| Wisconsin     | 9700<br>(8651, 10871) | 55.2                     | 334<br>(298, 375)       | 46.7                     | 205<br>(182, 230)                        | 29                       | 107<br>(93, 123)  | 31.6<br>(55.8)                 | 45<br>(37, 54)      | 35.2<br>(25.3)                 | 21 (17, 26)               | 19.8 (7.6)                     | 32<br>(25, 38)      | 19.6<br>(11.3)                 |
| Wyoming       | 663<br>(565, 782)     | 47.8                     | 232<br>(198, 274)       | 27.9                     | 164<br>(139, 194)                        | 16.1                     | 87<br>(72, 106)   | 18.9<br>(60.9)                 | 33<br>(26, 41)      | 19 (23)                        | 18 (14, 23)               | 10 (7.2)                       | 26<br>(21, 32)      | 8.4 (8.9)                      |

YLL: Years of Life Lost

UI is the uncertainty interval, it reflects the certainty of an estimate based on data availability, studies size and consistency across data sources

\*Percentage attributed to overall rate is the proportion of overall age-standardized rate change attributed by each of the following four causes: diabetes, hypertension, glomerulonephritis and other causes

**eTable 5c:** Number and age-standardized rate for overall YLL due to CKD and by cause in males, with percentage change from 2002 to 2016 for the United States and by state and district.

| Location      | YLL number                 |                          | YLL per 100,000 persons |                          | Age-standardized YLL per 100,000 persons |                          |                   |                                |                     |                                |                           |                                |                     |                                |
|---------------|----------------------------|--------------------------|-------------------------|--------------------------|------------------------------------------|--------------------------|-------------------|--------------------------------|---------------------|--------------------------------|---------------------------|--------------------------------|---------------------|--------------------------------|
|               |                            |                          |                         |                          | All causes                               |                          | Due to diabetes   |                                | Due to hypertension |                                | Due to glomerulonephritis |                                | Due to other causes |                                |
|               | 2016 (UI)                  | Percent change from 2002 | 2016 (UI)               | Percent change from 2002 | 2016 (UI)                                | Percent change from 2002 | 2016 (UI)         | Percent change from 2002 (PA*) | 2016 (UI)           | Percent change from 2002 (PA*) | 2016 (UI)                 | Percent change from 2002 (PA*) | 2016 (UI)           | Percent change from 2002 (PA*) |
| United States | 645873<br>(621356, 669078) | 60.6                     | 406<br>(391, 421)       | 42.7                     | 317<br>(305, 329)                        | 17.8                     | 183<br>(168, 197) | 21.7<br>(68.1)                 | 62 (53, 73)         | 17.9<br>(19.7)                 | 26 (21, 31)               | 9.9 (4.9)                      | 46<br>(38, 54)      | 8.2 (7.3)                      |
| Alabama       | 14497<br>(12331, 17089)    | 52.6                     | 616<br>(524, 726)       | 40.6                     | 475<br>(404, 558)                        | 17.2                     | 277<br>(231, 330) | 21.9<br>(71.5)                 | 86 (70, 106)        | 11.9<br>(13.1)                 | 41 (32, 51)               | 12.7 (6.7)                     | 71<br>(56, 89)      | 9.4 (8.7)                      |
| Alaska        | 827<br>(692, 976)          | 88.4                     | 213<br>(179, 252)       | 62.7                     | 216<br>(182, 253)                        | 25.8                     | 122<br>(101, 145) | 29.2<br>(61.9)                 | 43 (35, 53)         | 31.8<br>(23.5)                 | 19 (15, 24)               | 14.5 (5.4)                     | 33<br>(26, 41)      | 14.2<br>(9.1)                  |
| Arizona       | 11881<br>(10283, 13497)    | 80.3                     | 346<br>(300, 393)       | 41.6                     | 259<br>(224, 294)                        | 14.9                     | 151<br>(128, 177) | 20.6<br>(76.9)                 | 48 (39, 58)         | 11.5<br>(14.8)                 | 22 (17, 27)               | 5.6 (3.5)                      | 38<br>(30, 47)      | 4.5 (4.8)                      |
| Arkansas      | 8011<br>(6986, 9065)       | 63.8                     | 548<br>(478, 620)       | 48.1                     | 419<br>(367, 475)                        | 28.3                     | 244<br>(208, 280) | 33.8<br>(66.8)                 | 77 (63, 92)         | 27.8<br>(18.1)                 | 36 (29, 45)               | 17.3 (5.8)                     | 62<br>(50, 76)      | 16.1<br>(9.3)                  |
| California    | 59470<br>(50560, 68417)    | 83.5                     | 303<br>(258, 349)       | 63                       | 253<br>(215, 291)                        | 30.3                     | 148<br>(123, 173) | 34.8<br>(64.8)                 | 50 (40, 61)         | 34.4<br>(21.6)                 | 20 (15, 25)               | 16.6 (4.9)                     | 36<br>(28, 45)      | 17 (8.8)                       |

| Location             | YLL number              |                          | YLL per 100,000 persons |                          | Age-standardized YLL per 100,000 persons |                          |                   |                                |                     |                                |                           |                                |                     |                                |
|----------------------|-------------------------|--------------------------|-------------------------|--------------------------|------------------------------------------|--------------------------|-------------------|--------------------------------|---------------------|--------------------------------|---------------------------|--------------------------------|---------------------|--------------------------------|
|                      |                         |                          |                         |                          | All causes                               |                          | Due to diabetes   |                                | Due to hypertension |                                | Due to glomerulonephritis |                                | Due to other causes |                                |
|                      | 2016 (UI)               | Percent change from 2002 | 2016 (UI)               | Percent change from 2002 | 2016 (UI)                                | Percent change from 2002 | 2016 (UI)         | Percent change from 2002 (PA*) | 2016 (UI)           | Percent change from 2002 (PA*) | 2016 (UI)                 | Percent change from 2002 (PA*) | 2016 (UI)           | Percent change from 2002 (PA*) |
| Colorado             | 6912<br>(6131, 7755)    | 81.1                     | 250<br>(221, 280)       | 48                       | 212<br>(189, 238)                        | 13.1                     | 120<br>(103, 138) | 17.4<br>(72.3)                 | 44 (37, 54)         | 10.8<br>(17.6)                 | 17 (14, 21)               | 7.1 (4.7)                      | 31<br>(25, 38)      | 4.6 (5.5)                      |
| Connecticut          | 5861<br>(4992, 6873)    | 31.3                     | 336<br>(286, 394)       | 25.8                     | 245<br>(209, 287)                        | 6.6                      | 139<br>(116, 168) | 8.4<br>(69.4)                  | 51 (41, 63)         | 8.9<br>(26.9)                  | 20 (16, 25)               | 2 (2.6)                        | 35<br>(28, 45)      | -0.5<br>(1.1)                  |
| Delaware             | 2103<br>(1867, 2363)    | 68.2                     | 455<br>(404, 512)       | 42.6                     | 330<br>(293, 371)                        | 14.4                     | 191<br>(164, 218) | 18.9<br>(72.8)                 | 62 (50, 74)         | 12.7<br>(16.7)                 | 29 (23, 35)               | 8.3 (5.3)                      | 49<br>(40, 59)      | 4.5 (5.1)                      |
| District of Columbia | 1512<br>(1298, 1766)    | 1.8                      | 464<br>(398, 542)       | -14.5                    | 444<br>(381, 519)                        | -14.8                    | 265<br>(222, 313) | -10.7<br>(41.2)                | 78 (63, 97)         | -7.6 (8.3)                     | 37 (28, 47)               | -30.8<br>(21.1)                | 64<br>(50, 81)      | -26.3<br>(29.4)                |
| Florida              | 44059<br>(38492, 50451) | 76.6                     | 441<br>(385, 505)       | 43.9                     | 289<br>(252, 332)                        | 25.4                     | 169<br>(142, 197) | 31.2<br>(68.5)                 | 53 (44, 64)         | 24.3<br>(17.8)                 | 24 (19, 30)               | 14.1 (5.1)                     | 42<br>(34, 52)      | 13.5<br>(8.6)                  |
| Georgia              | 24994<br>(21389, 29479) | 74.9                     | 499<br>(427, 589)       | 46.3                     | 434<br>(373, 509)                        | 13.3                     | 253<br>(213, 303) | 16.2<br>(69.4)                 | 83 (67, 102)        | 14.1<br>(20.2)                 | 36 (28, 45)               | 7.4 (4.9)                      | 63<br>(50, 78)      | 4.7 (5.5)                      |
| Hawaii               | 2556<br>(2275, 2866)    | 72.1                     | 350<br>(311, 392)       | 47.7                     | 261<br>(233, 294)                        | 27                       | 152<br>(132, 174) | 31.6<br>(65.7)                 | 50 (41, 60)         | 27 (19.1)                      | 21 (17, 26)               | 17.9 (5.9)                     | 38<br>(30, 46)      | 16.1<br>(9.4)                  |

| Location  | YLL number              |                          | YLL per 100,000 persons |                          | Age-standardized YLL per 100,000 persons |                          |                   |                                |                     |                                |                           |                                |                     |                                |
|-----------|-------------------------|--------------------------|-------------------------|--------------------------|------------------------------------------|--------------------------|-------------------|--------------------------------|---------------------|--------------------------------|---------------------------|--------------------------------|---------------------|--------------------------------|
|           |                         |                          |                         |                          | All causes                               |                          | Due to diabetes   |                                | Due to hypertension |                                | Due to glomerulonephritis |                                | Due to other causes |                                |
|           | 2016 (UI)               | Percent change from 2002 | 2016 (UI)               | Percent change from 2002 | 2016 (UI)                                | Percent change from 2002 | 2016 (UI)         | Percent change from 2002 (PA*) | 2016 (UI)           | Percent change from 2002 (PA*) | 2016 (UI)                 | Percent change from 2002 (PA*) | 2016 (UI)           | Percent change from 2002 (PA*) |
| Idaho     | 2476<br>(2106, 2911)    | 103.8                    | 295<br>(251, 346)       | 62.6                     | 234<br>(200, 275)                        | 32.1                     | 132<br>(109, 158) | 36.7<br>(62.2)                 | 48 (39, 59)         | 33.1<br>(21.2)                 | 19 (15, 25)               | 22.5 (6.3)                     | 34<br>(27, 43)      | 20.7<br>(10.3)                 |
| Illinois  | 27515<br>(24348, 30660) | 37                       | 436<br>(386, 486)       | 33.5                     | 348<br>(309, 387)                        | 8.3                      | 200<br>(174, 227) | 11.1<br>(70.7)                 | 70 (58, 84)         | 11.9<br>(26.3)                 | 28 (22, 34)               | -1 (1)                         | 50<br>(39, 62)      | -1.1 (2)                       |
| Indiana   | 15876<br>(13505, 18531) | 59.4                     | 486<br>(413, 567)       | 47.5                     | 388<br>(330, 452)                        | 22                       | 220<br>(181, 263) | 25.6<br>(64.3)                 | 78 (62, 97)         | 20.6<br>(19.1)                 | 33 (25, 41)               | 17.3 (6.9)                     | 57<br>(45, 70)      | 13.6<br>(9.7)                  |
| Iowa      | 4749<br>(4164, 5399)    | 70.1                     | 305<br>(267, 347)       | 57.4                     | 223<br>(196, 254)                        | 38                       | 126<br>(108, 147) | 42.3<br>(61)                   | 47 (39, 57)         | 39.7<br>(21.8)                 | 18 (14, 22)               | 27.8 (6.4)                     | 32<br>(26, 40)      | 26.3<br>(10.9)                 |
| Kansas    | 5785<br>(4894, 6801)    | 53.7                     | 399<br>(338, 469)       | 42.2                     | 316<br>(266, 371)                        | 23                       | 180<br>(148, 214) | 28.1<br>(66.9)                 | 64 (52, 78)         | 20 (18.1)                      | 26 (20, 33)               | 15.9 (6.1)                     | 46<br>(36, 57)      | 13.1 (9)                       |
| Kentucky  | 11904<br>(10584, 13395) | 69                       | 546<br>(486, 615)       | 55.3                     | 426<br>(380, 478)                        | 26.8                     | 245<br>(214, 283) | 31.7<br>(65.6)                 | 83 (69, 101)        | 23.3<br>(17.5)                 | 35 (28, 43)               | 20.4 (6.7)                     | 62<br>(50, 75)      | 17.5<br>(10.2)                 |
| Louisiana | 15318<br>(13590, 17165) | 44                       | 669<br>(594, 750)       | 37.4                     | 553<br>(494, 619)                        | 14.4                     | 322<br>(279, 367) | 18.2<br>(71)                   | 102 (85, 122)       | 16.4<br>(20.6)                 | 48 (38, 58)               | 5 (3.3)                        | 82<br>(67, 99)      | 4.5 (5.1)                      |

| Location      | YLL number              |                          | YLL per 100,000 persons |                          | Age-standardized YLL per 100,000 persons |                          |                   |                                |                     |                                |                           |                                |                     |                                |
|---------------|-------------------------|--------------------------|-------------------------|--------------------------|------------------------------------------|--------------------------|-------------------|--------------------------------|---------------------|--------------------------------|---------------------------|--------------------------------|---------------------|--------------------------------|
|               |                         |                          |                         |                          | All causes                               |                          | Due to diabetes   |                                | Due to hypertension |                                | Due to glomerulonephritis |                                | Due to other causes |                                |
|               | 2016 (UI)               | Percent change from 2002 | 2016 (UI)               | Percent change from 2002 | 2016 (UI)                                | Percent change from 2002 | 2016 (UI)         | Percent change from 2002 (PA*) | 2016 (UI)           | Percent change from 2002 (PA*) | 2016 (UI)                 | Percent change from 2002 (PA*) | 2016 (UI)           | Percent change from 2002 (PA*) |
| Maine         | 2766<br>(2466, 3081)    | 55.9                     | 425<br>(379, 474)       | 51                       | 274<br>(246, 305)                        | 17.6                     | 153<br>(132, 174) | 20.1<br>(62.6)                 | 57 (47, 69)         | 15.1<br>(18.3)                 | 23 (19, 28)               | 16.8 (8.2)                     | 40<br>(33, 49)      | 12.5<br>(11)                   |
| Maryland      | 11359<br>(10160, 12763) | 39.6                     | 389<br>(348, 437)       | 25.3                     | 312<br>(280, 349)                        | 4.2                      | 180<br>(158, 206) | 6.8<br>(61.6)                  | 60 (49, 72)         | 7.3<br>(21.7)                  | 27 (21, 33)               | -3.9 (5.8)                     | 46<br>(36, 56)      | -4.3 (11)                      |
| Massachusetts | 12509<br>(11072, 14074) | 31.1                     | 377<br>(334, 424)       | 22.3                     | 285<br>(252, 320)                        | 3.4                      | 160<br>(137, 185) | 4.8<br>(63.2)                  | 61 (51, 73)         | 5.5 (27)                       | 23 (18, 28)               | 0.1 (0.2)                      | 41<br>(33, 50)      | -2.7<br>(9.7)                  |
| Michigan      | 21159<br>(18888, 23645) | 47.2                     | 434<br>(388, 485)       | 48.3                     | 323<br>(288, 360)                        | 17                       | 184<br>(161, 210) | 20.5<br>(66.7)                 | 64 (54, 77)         | 16.5<br>(19.3)                 | 27 (22, 33)               | 11.7 (6)                       | 47<br>(38, 57)      | 8.7 (8)                        |
| Minnesota     | 8720<br>(7697, 9906)    | 61.1                     | 318<br>(281, 362)       | 46                       | 243<br>(214, 276)                        | 17.1                     | 135<br>(115, 155) | 21.1<br>(66.2)                 | 54 (44, 66)         | 15.9<br>(20.9)                 | 19 (15, 24)               | 10.4 (5.2)                     | 35<br>(28, 43)      | 8.5 (7.7)                      |
| Mississippi   | 10158<br>(8511, 11776)  | 57.8                     | 701<br>(587, 813)       | 50.6                     | 566<br>(478, 654)                        | 23.8                     | 333<br>(275, 395) | 28.6<br>(67.9)                 | 101 (81, 125)       | 22.1<br>(16.8)                 | 49 (38, 61)               | 15.8 (6.1)                     | 83<br>(65, 105)     | 13.7<br>(9.2)                  |
| Missouri      | 14201<br>(12628, 15887) | 58                       | 476<br>(423, 532)       | 46.2                     | 359<br>(320, 401)                        | 22.4                     | 207<br>(180, 235) | 27.2<br>(67.3)                 | 70 (59, 84)         | 20.6<br>(18.2)                 | 30 (24, 37)               | 14.2 (5.7)                     | 52<br>(43, 64)      | 12.3<br>(8.8)                  |

| Location      | YLL number              |                          | YLL per 100,000 persons |                          | Age-standardized YLL per 100,000 persons |                          |                   |                                |                     |                                |                           |                                |                     |                                |
|---------------|-------------------------|--------------------------|-------------------------|--------------------------|------------------------------------------|--------------------------|-------------------|--------------------------------|---------------------|--------------------------------|---------------------------|--------------------------------|---------------------|--------------------------------|
|               |                         |                          |                         |                          | All causes                               |                          | Due to diabetes   |                                | Due to hypertension |                                | Due to glomerulonephritis |                                | Due to other causes |                                |
|               | 2016 (UI)               | Percent change from 2002 | 2016 (UI)               | Percent change from 2002 | 2016 (UI)                                | Percent change from 2002 | 2016 (UI)         | Percent change from 2002 (PA*) | 2016 (UI)           | Percent change from 2002 (PA*) | 2016 (UI)                 | Percent change from 2002 (PA*) | 2016 (UI)           | Percent change from 2002 (PA*) |
| Montana       | 1510<br>(1268, 1783)    | 55.8                     | 289<br>(243, 342)       | 35.7                     | 204<br>(171, 241)                        | 12.2                     | 115<br>(94, 140)  | 17.6<br>(77.8)                 | 40 (32, 50)         | 7.8<br>(13.1)                  | 18 (14, 22)               | 6 (4.6)                        | 31<br>(24, 38)      | 3.4 (4.5)                      |
| Nebraska      | 3284<br>(2916, 3697)    | 49.2                     | 345<br>(306, 388)       | 33.9                     | 272<br>(242, 306)                        | 17.5                     | 154<br>(132, 177) | 21.3<br>(66.3)                 | 57 (47, 68)         | 17.5<br>(20.8)                 | 22 (18, 28)               | 11.3 (5.6)                     | 39<br>(32, 49)      | 8.1 (7.3)                      |
| Nevada        | 6708<br>(5919, 7555)    | 66.3                     | 457<br>(403, 514)       | 24.7                     | 356<br>(314, 400)                        | 0.4                      | 206<br>(178, 236) | 3.9<br>(55.6)                  | 67 (56, 81)         | -2.2<br>(10.9)                 | 30 (24, 37)               | -3.5 (7.9)                     | 52<br>(42, 63)      | -6.3<br>(25.5)                 |
| New Hampshire | 2103<br>(1871, 2352)    | 75.7                     | 319<br>(284, 357)       | 65.9                     | 224<br>(200, 252)                        | 23.1                     | 125<br>(108, 144) | 25.5<br>(60.1)                 | 47 (39, 57)         | 21.3<br>(19.8)                 | 19 (15, 23)               | 23.2 (8.5)                     | 33<br>(27, 41)      | 17.4<br>(11.6)                 |
| New Jersey    | 17188<br>(15120, 19618) | 26.6                     | 392<br>(345, 448)       | 19.9                     | 302<br>(266, 344)                        | 1.7                      | 172<br>(148, 199) | 3.2<br>(49.1)                  | 62 (51, 74)         | 4.4<br>(24.1)                  | 25 (19, 31)               | -2.5 (5.8)                     | 44<br>(35, 54)      | -4.9 (21)                      |
| New Mexico    | 4273<br>(3596, 4979)    | 83.7                     | 416<br>(350, 484)       | 63.4                     | 319<br>(268, 372)                        | 32.8                     | 185<br>(152, 220) | 38.6<br>(65.1)                 | 59 (47, 72)         | 31.3<br>(17.7)                 | 28 (22, 36)               | 23 (6.7)                       | 48<br>(38, 60)      | 20.9<br>(10.4)                 |
| New York      | 30797<br>(26215, 35887) | 28.8                     | 320<br>(272, 373)       | 23.7                     | 248<br>(211, 289)                        | 3.9                      | 143<br>(118, 172) | 5.6<br>(58.1)                  | 49 (39, 61)         | 7.8 (27)                       | 20 (16, 25)               | -2.7 (4.2)                     | 36<br>(27, 44)      | -3.8<br>(10.7)                 |

| Location       | YLL number              |                          | YLL per 100,000 persons |                          | Age-standardized YLL per 100,000 persons |                          |                   |                                |                     |                                |                           |                                |                     |                                |
|----------------|-------------------------|--------------------------|-------------------------|--------------------------|------------------------------------------|--------------------------|-------------------|--------------------------------|---------------------|--------------------------------|---------------------------|--------------------------------|---------------------|--------------------------------|
|                |                         |                          |                         |                          | All causes                               |                          | Due to diabetes   |                                | Due to hypertension |                                | Due to glomerulonephritis |                                | Due to other causes |                                |
|                | 2016 (UI)               | Percent change from 2002 | 2016 (UI)               | Percent change from 2002 | 2016 (UI)                                | Percent change from 2002 | 2016 (UI)         | Percent change from 2002 (PA*) | 2016 (UI)           | Percent change from 2002 (PA*) | 2016 (UI)                 | Percent change from 2002 (PA*) | 2016 (UI)           | Percent change from 2002 (PA*) |
| North Carolina | 24139<br>(21689, 26967) | 73.4                     | 491<br>(441, 548)       | 43.8                     | 384<br>(345, 429)                        | 14.9                     | 223<br>(195, 253) | 18.3<br>(69.4)                 | 74 (62, 88)         | 14.6<br>(18.9)                 | 32 (25, 39)               | 8.6 (5.1)                      | 55<br>(45, 67)      | 6.3 (6.6)                      |
| North Dakota   | 1200<br>(1043, 1379)    | 56.8                     | 303<br>(263, 348)       | 26.5                     | 252<br>(218, 291)                        | 26.3                     | 142<br>(120, 167) | 29.1<br>(60.8)                 | 51 (42, 62)         | 26.4<br>(20.3)                 | 22 (17, 27)               | 23.7 (8)                       | 38<br>(30, 46)      | 18.1<br>(11)                   |
| Ohio           | 26989<br>(24151, 30300) | 50.3                     | 474<br>(424, 533)       | 46.6                     | 354<br>(318, 397)                        | 20.6                     | 204<br>(178, 232) | 25<br>(67.5)                   | 69 (57, 84)         | 16.4<br>(16.1)                 | 30 (24, 36)               | 16.4 (6.9)                     | 51<br>(42, 63)      | 12.5<br>(9.5)                  |
| Oklahoma       | 8793<br>(7812, 9841)    | 73.6                     | 454<br>(403, 508)       | 54.1                     | 367<br>(327, 410)                        | 35.2                     | 213<br>(184, 242) | 41.6<br>(65.5)                 | 68 (56, 83)         | 31.1 (17)                      | 31 (25, 38)               | 25.9 (6.8)                     | 54<br>(44, 66)      | 23.5<br>(10.8)                 |
| Oregon         | 6110<br>(5491, 6853)    | 77                       | 305<br>(274, 342)       | 53.8                     | 218<br>(197, 245)                        | 24                       | 124<br>(107, 142) | 28.2<br>(64.5)                 | 46 (38, 55)         | 25 (21.6)                      | 17 (14, 21)               | 14.8 (5.3)                     | 31<br>(26, 38)      | 13.3<br>(8.6)                  |
| Pennsylvania   | 29465<br>(26449, 32828) | 29.6                     | 472<br>(423, 525)       | 23.6                     | 332<br>(297, 370)                        | 7.1                      | 190<br>(166, 218) | 10.2<br>(77.2)                 | 67 (55, 80)         | 7.3 (20)                       | 27 (22, 33)               | 0.8 (1)                        | 48<br>(39, 58)      | -0.9<br>(1.8)                  |
| Rhode Island   | 1688<br>(1461, 1962)    | 30.5                     | 330<br>(286, 384)       | 30.6                     | 243<br>(210, 282)                        | 11.7                     | 138<br>(115, 163) | 14.4<br>(68.3)                 | 49 (40, 61)         | 12.5<br>(21.6)                 | 20 (16, 25)               | 6.5 (4.9)                      | 35<br>(28, 44)      | 4 (5.3)                        |

| Location       | YLL number              |                          | YLL per 100,000 persons |                          | Age-standardized YLL per 100,000 persons |                          |                   |                                |                     |                                |                           |                                |                     |                                |
|----------------|-------------------------|--------------------------|-------------------------|--------------------------|------------------------------------------|--------------------------|-------------------|--------------------------------|---------------------|--------------------------------|---------------------------|--------------------------------|---------------------|--------------------------------|
|                |                         |                          |                         |                          | All causes                               |                          | Due to diabetes   |                                | Due to hypertension |                                | Due to glomerulonephritis |                                | Due to other causes |                                |
|                | 2016 (UI)               | Percent change from 2002 | 2016 (UI)               | Percent change from 2002 | 2016 (UI)                                | Percent change from 2002 | 2016 (UI)         | Percent change from 2002 (PA*) | 2016 (UI)           | Percent change from 2002 (PA*) | 2016 (UI)                 | Percent change from 2002 (PA*) | 2016 (UI)           | Percent change from 2002 (PA*) |
| South Carolina | 13249<br>(11398, 15255) | 66.1                     | 553<br>(475, 636)       | 38.2                     | 415<br>(358, 478)                        | 9                        | 242<br>(203, 286) | 11.9<br>(75.6)                 | 77 (63, 95)         | 10.1<br>(20.9)                 | 35 (27, 44)               | 2.3 (2.3)                      | 60<br>(48, 74)      | 0.7 (1.2)                      |
| South Dakota   | 1311<br>(1131, 1518)    | 52.9                     | 301<br>(260, 348)       | 32.8                     | 229<br>(198, 265)                        | 18.4                     | 129<br>(108, 152) | 23.5<br>(68.9)                 | 45 (37, 54)         | 14.2<br>(15.7)                 | 20 (16, 25)               | 13.1 (6.6)                     | 35<br>(28, 43)      | 9.9 (8.8)                      |
| Tennessee      | 15487<br>(13674, 17385) | 81.9                     | 479<br>(423, 537)       | 58.9                     | 371<br>(330, 415)                        | 30.1                     | 216<br>(186, 247) | 35.4<br>(65.7)                 | 70 (58, 83)         | 29.8<br>(18.7)                 | 31 (25, 38)               | 19.5 (5.9)                     | 54<br>(44, 66)      | 18.3<br>(9.7)                  |
| Texas          | 55493<br>(48668, 62529) | 110.3                    | 401<br>(352, 452)       | 64.2                     | 369<br>(325, 414)                        | 35.3                     | 216<br>(185, 248) | 41<br>(65.3)                   | 71 (58, 85)         | 33.8<br>(18.5)                 | 30 (24, 37)               | 24.3 (6.1)                     | 52<br>(42, 65)      | 22.8<br>(10.1)                 |
| Utah           | 3677<br>(3260, 4136)    | 93.3                     | 242<br>(214, 272)       | 49.2                     | 251<br>(223, 282)                        | 23.9                     | 141<br>(122, 162) | 28.2<br>(64.4)                 | 53 (43, 63)         | 23.6<br>(20.8)                 | 21 (16, 25)               | 15.7 (5.8)                     | 36<br>(29, 44)      | 13.7<br>(9.1)                  |
| Vermont        | 871<br>(764, 986)       | 56.7                     | 283<br>(248, 321)       | 53.7                     | 195<br>(171, 220)                        | 18.5                     | 109<br>(93, 127)  | 20.7<br>(61.4)                 | 41 (33, 50)         | 18.4 (21)                      | 16 (13, 20)               | 16.2 (7.5)                     | 28<br>(23, 35)      | 12.1<br>(10.1)                 |
| Virginia       | 17603<br>(15757, 19715) | 56.5                     | 424<br>(380, 475)       | 34.9                     | 342<br>(306, 381)                        | 8.5                      | 197<br>(171, 224) | 11.6<br>(76.1)                 | 69 (57, 82)         | 9.4<br>(22.1)                  | 27 (22, 33)               | 1.5 (1.5)                      | 49<br>(39, 59)      | -0.1<br>(0.3)                  |



| Location      | YLL number             |                          | YLL per 100,000 persons |                          | Age-standardized YLL per 100,000 persons |                          |                   |                                |                     |                                |                           |                                |                     |                                |
|---------------|------------------------|--------------------------|-------------------------|--------------------------|------------------------------------------|--------------------------|-------------------|--------------------------------|---------------------|--------------------------------|---------------------------|--------------------------------|---------------------|--------------------------------|
|               |                        |                          |                         |                          | All causes                               |                          | Due to diabetes   |                                | Due to hypertension |                                | Due to glomerulonephritis |                                | Due to other causes |                                |
|               | 2016 (UI)              | Percent change from 2002 | 2016 (UI)               | Percent change from 2002 | 2016 (UI)                                | Percent change from 2002 | 2016 (UI)         | Percent change from 2002 (PA*) | 2016 (UI)           | Percent change from 2002 (PA*) | 2016 (UI)                 | Percent change from 2002 (PA*) | 2016 (UI)           | Percent change from 2002 (PA*) |
| Washington    | 9155<br>(8120, 10250)  | 103.4                    | 253<br>(225, 284)       | 69.6                     | 199<br>(177, 223)                        | 36.8                     | 113<br>(97, 130)  | 41.6<br>(61.9)                 | 42 (35, 51)         | 39.8<br>(22.4)                 | 16 (12, 19)               | 23.9 (5.7)                     | 28<br>(23, 34)      | 23.5<br>(10)                   |
| West Virginia | 6062<br>(5387, 6804)   | 65.8                     | 670<br>(596, 752)       | 61.6                     | 459<br>(409, 514)                        | 36.3                     | 264<br>(230, 304) | 41.2<br>(63.1)                 | 88 (73, 105)        | 34.4<br>(18.3)                 | 39 (31, 47)               | 28.4 (7.1)                     | 68<br>(55, 82)      | 26.1<br>(11.4)                 |
| Wisconsin     | 10710<br>(9579, 11888) | 56.1                     | 373<br>(334, 414)       | 46.2                     | 274<br>(245, 304)                        | 18.2                     | 153<br>(134, 173) | 21.7<br>(64.9)                 | 59 (48, 70)         | 18.5<br>(21.8)                 | 22 (18, 27)               | 11.3 (5.4)                     | 40<br>(31, 48)      | 9.2 (7.9)                      |
| Wyoming       | 833<br>(716, 966)      | 65.4                     | 279<br>(240, 324)       | 39.6                     | 221<br>(191, 257)                        | 16.6                     | 125<br>(105, 150) | 22.5<br>(72.9)                 | 44 (35, 53)         | 13.9<br>(16.9)                 | 19 (15, 24)               | 7.5 (4.3)                      | 33<br>(27, 41)      | 5.9 (5.9)                      |

YLL: Years of Life Lost

UI is the uncertainty interval, it reflects the certainty of an estimate based on data availability, studies size and consistency across data sources

\*Percentage attributed to overall rate is the proportion of overall age-standardized rate change attributed by each of the following four causes: diabetes, hypertension, glomerulonephritis and other causes

**eTable6:** Disability-adjusted life years (DALYs) due to CKD in the United States and by state and district in females and males.

**eTable 6a:** Number and age-standardized rate for overall DALY due to CKD and by cause in females, with percentage change from 2002 to 2016 for the United States and by state and district.

| Location      | DALY number                 |                          | DALY per 100,000 persons |                          | Age-standardized DALY per 100,000 persons |                          |                   |                                |                     |                                |                           |                                |                     |                                |
|---------------|-----------------------------|--------------------------|--------------------------|--------------------------|-------------------------------------------|--------------------------|-------------------|--------------------------------|---------------------|--------------------------------|---------------------------|--------------------------------|---------------------|--------------------------------|
|               |                             |                          |                          |                          | All causes                                |                          | Due to diabetes   |                                | Due to hypertension |                                | Due to glomerulonephritis |                                | Due to other causes |                                |
|               | 2016 (UI)                   | Percent change from 2002 | 2016 (UI)                | Percent change from 2002 | 2016 (UI)                                 | Percent change from 2002 | 2016 (UI)         | Percent change from 2002 (PA*) | 2016 (UI)           | Percent change from 2002 (PA*) | 2016 (UI)                 | Percent change from 2002 (PA*) | 2016 (UI)           | Percent change from 2002 (PA*) |
| United States | 954857<br>(859005, 1055540) | 46.5                     | 583<br>(524, 644)        | 30.8                     | 402<br>(359, 446)                         | 17.5                     | 214<br>(188, 242) | 20.2<br>(60)                   | 77<br>(63, 90)      | 21.7<br>(22.9)                 | 46 (38, 56)               | 9.9 (7)                        | 64<br>(52, 78)      | 10.3<br>(10)                   |
| Alabama       | 20442<br>(17706, 23318)     | 41                       | 815<br>(706, 930)        | 30.2                     | 558<br>(482, 637)                         | 19.6                     | 299<br>(252, 349) | 23.5<br>(62.3)                 | 102<br>(82, 125)    | 19.9<br>(18.6)                 | 66 (52, 82)               | 12.4<br>(7.9)                  | 90<br>(73, 111)     | 12.7<br>(11.1)                 |
| Alaska        | 1328<br>(1134, 1527)        | 68.9                     | 382<br>(326, 439)        | 51.4                     | 346<br>(297, 399)                         | 20.7                     | 182<br>(152, 214) | 23.6<br>(58.6)                 | 66<br>(53, 81)      | 25.7<br>(22.7)                 | 42 (32, 52)               | 12.4<br>(7.8)                  | 57<br>(45, 70)      | 12.8<br>(10.9)                 |
| Arizona       | 18164<br>(15660, 20807)     | 73.1                     | 522<br>(450, 598)        | 34.6                     | 358<br>(307, 410)                         | 17.4                     | 191<br>(160, 222) | 20.2<br>(60.4)                 | 67<br>(54, 81)      | 19.4<br>(20.4)                 | 42 (33, 52)               | 11.4<br>(8.1)                  | 58<br>(46, 71)      | 11.3<br>(11.1)                 |
| Arkansas      | 11431<br>(10005, 12820)     | 49.5                     | 756<br>(662, 848)        | 36.6                     | 515<br>(450, 579)                         | 28.4                     | 277<br>(237, 318) | 32.7<br>(59.8)                 | 96<br>(78, 115)     | 31.9<br>(20.3)                 | 60 (48, 73)               | 18.3<br>(8.2)                  | 83<br>(67, 101)     | 19.2<br>(11.7)                 |
| California    | 91965<br>(79881, 105553)    | 54                       | 463<br>(402, 532)        | 36                       | 342<br>(295, 393)                         | 16.6                     | 182<br>(155, 215) | 18.8<br>(59.3)                 | 65<br>(52, 79)      | 25.3<br>(27.1)                 | 39 (31, 49)               | 6.6 (5)                        | 54<br>(43, 67)      | 8.4 (8.6)                      |

| Location             | DALY number             |                          | DALY per 100,000 persons |                          | Age-standardized DALY per 100,000 persons |                          |                   |                                |                     |                                |                           |                                |                     |                                |
|----------------------|-------------------------|--------------------------|--------------------------|--------------------------|-------------------------------------------|--------------------------|-------------------|--------------------------------|---------------------|--------------------------------|---------------------------|--------------------------------|---------------------|--------------------------------|
|                      |                         |                          |                          |                          | All causes                                |                          | Due to diabetes   |                                | Due to hypertension |                                | Due to glomerulonephritis |                                | Due to other causes |                                |
|                      | 2016 (UI)               | Percent change from 2002 | 2016 (UI)                | Percent change from 2002 | 2016 (UI)                                 | Percent change from 2002 | 2016 (UI)         | Percent change from 2002 (PA*) | 2016 (UI)           | Percent change from 2002 (PA*) | 2016 (UI)                 | Percent change from 2002 (PA*) | 2016 (UI)           | Percent change from 2002 (PA*) |
| Colorado             | 11107<br>(9672, 12641)  | 58.7                     | 406<br>(353, 462)        | 29.1                     | 302<br>(261, 346)                         | 10.5                     | 159<br>(134, 186) | 12.2<br>(60.6)                 | 59<br>(47, 71)      | 13<br>(23.9)                   | 35 (28, 44)               | 6.2 (7.3)                      | 49<br>(39, 60)      | 5.1 (8.3)                      |
| Connecticut          | 9092<br>(7746, 10339)   | 23.6                     | 496<br>(423, 564)        | 19.6                     | 316<br>(268, 361)                         | 9.5                      | 166<br>(139, 195) | 10.8<br>(59.3)                 | 61<br>(49, 74)      | 13.8<br>(27.2)                 | 37 (29, 46)               | 4.3 (5.6)                      | 51<br>(40, 63)      | 4.4 (7.9)                      |
| Delaware             | 3112<br>(2713, 3508)    | 63.8                     | 634<br>(552, 714)        | 38.2                     | 412<br>(359, 466)                         | 18.7                     | 219<br>(187, 252) | 21.4<br>(59.6)                 | 77<br>(62, 93)      | 21.5<br>(21)                   | 49 (39, 60)               | 13 (8.6)                       | 67<br>(54, 82)      | 11.7<br>(10.8)                 |
| District of Columbia | 1866<br>(1592, 2136)    | 4.6                      | 519<br>(443, 595)        | -10.8                    | 439<br>(373, 503)                         | -6.3                     | 239<br>(200, 279) | -3.8<br>(31.6)                 | 80<br>(63, 96)      | 0.4 (1.1)                      | 50 (39, 61)               | -15.6<br>(30.6)                | 70<br>(55, 87)      | -13.7<br>(36.8)                |
| Florida              | 61713<br>(53016, 70319) | 60.2                     | 590<br>(507, 673)        | 30.8                     | 356<br>(305, 407)                         | 20.7                     | 191<br>(160, 224) | 24.5<br>(61.4)                 | 65<br>(52, 78)      | 23.7<br>(20.4)                 | 42 (33, 52)               | 12 (7.4)                       | 58<br>(46, 71)      | 12.7<br>(10.7)                 |
| Georgia              | 35818<br>(31273, 41080) | 56.1                     | 679<br>(593, 779)        | 28.2                     | 516<br>(450, 594)                         | 9.9                      | 276<br>(236, 321) | 11.9<br>(63.4)                 | 99<br>(80, 122)     | 14.5<br>(27.2)                 | 59 (46, 71)               | 2.9 (3.5)                      | 82<br>(66, 101)     | 3.5 (5.9)                      |
| Hawaii               | 3801<br>(3293, 4307)    | 61                       | 536<br>(464, 607)        | 40.5                     | 344<br>(295, 392)                         | 20.2                     | 184<br>(156, 215) | 23.3<br>(60.2)                 | 64<br>(52, 77)      | 24.1<br>(21.5)                 | 40 (32, 50)               | 12 (7.4)                       | 55<br>(44, 67)      | 12.8<br>(10.9)                 |

| Location  | DALY number             |                          | DALY per 100,000 persons |                          | Age-standardized DALY per 100,000 persons |                          |                   |                                |                     |                                |                           |                                |                     |                                |
|-----------|-------------------------|--------------------------|--------------------------|--------------------------|-------------------------------------------|--------------------------|-------------------|--------------------------------|---------------------|--------------------------------|---------------------------|--------------------------------|---------------------|--------------------------------|
|           |                         |                          |                          |                          | All causes                                |                          | Due to diabetes   |                                | Due to hypertension |                                | Due to glomerulonephritis |                                | Due to other causes |                                |
|           | 2016 (UI)               | Percent change from 2002 | 2016 (UI)                | Percent change from 2002 | 2016 (UI)                                 | Percent change from 2002 | 2016 (UI)         | Percent change from 2002 (PA*) | 2016 (UI)           | Percent change from 2002 (PA*) | 2016 (UI)                 | Percent change from 2002 (PA*) | 2016 (UI)           | Percent change from 2002 (PA*) |
| Idaho     | 3942<br>(3388, 4532)    | 81.6                     | 472<br>(405, 542)        | 45.1                     | 342<br>(293, 395)                         | 27.8                     | 180<br>(150, 212) | 30.4<br>(56.3)                 | 67<br>(53, 81)      | 33<br>(22.4)                   | 40 (32, 50)               | 20.1<br>(8.9)                  | 55<br>(44, 68)      | 20<br>(12.3)                   |
| Illinois  | 38684<br>(34122, 43211) | 25.1                     | 592<br>(522, 661)        | 22.4                     | 407<br>(358, 457)                         | 8.8                      | 216<br>(187, 247) | 10.6<br>(62.4)                 | 80<br>(65, 97)      | 15.1<br>(31.6)                 | 46 (37, 56)               | 1.2 (1.6)                      | 65<br>(53, 79)      | 2.2 (4.3)                      |
| Indiana   | 23128<br>(20026, 26516) | 45.7                     | 688<br>(596, 789)        | 35.6                     | 474<br>(409, 546)                         | 23.9                     | 251<br>(214, 295) | 26.6<br>(57.8)                 | 93<br>(75, 114)     | 27.7<br>(22)                   | 54 (43, 67)               | 16.7<br>(8.5)                  | 76<br>(61, 93)      | 16.4<br>(11.7)                 |
| Iowa      | 7930<br>(6851, 9071)    | 40.7                     | 503<br>(435, 576)        | 32.9                     | 321<br>(275, 370)                         | 27.8                     | 169<br>(142, 199) | 30.1<br>(56.1)                 | 63<br>(50, 76)      | 34<br>(22.9)                   | 37 (29, 46)               | 19.9<br>(8.8)                  | 51<br>(41, 64)      | 19.9<br>(12.2)                 |
| Kansas    | 8655<br>(7507, 9916)    | 34.7                     | 594<br>(515, 680)        | 26.7                     | 407<br>(350, 469)                         | 20.5                     | 217<br>(183, 252) | 23.9<br>(60.3)                 | 79<br>(63, 96)      | 22.4<br>(20.8)                 | 47 (37, 57)               | 12.9<br>(7.7)                  | 65<br>(53, 80)      | 13.6<br>(11.2)                 |
| Kentucky  | 16640<br>(14718, 18693) | 49.9                     | 741<br>(655, 832)        | 39.2                     | 504<br>(444, 568)                         | 25.9                     | 269<br>(232, 310) | 29.6<br>(59)                   | 97<br>(81, 116)     | 28.1<br>(20.4)                 | 58 (46, 70)               | 18.2<br>(8.6)                  | 81<br>(66, 97)      | 18.2<br>(12)                   |
| Louisiana | 20814<br>(18403, 23216) | 35.7                     | 870<br>(769, 971)        | 31.4                     | 634<br>(559, 709)                         | 17.4                     | 341<br>(295, 387) | 19.9<br>(60.3)                 | 118<br>(97, 142)    | 21.5<br>(22.2)                 | 73 (58, 89)               | 10.6<br>(7.5)                  | 102<br>(83, 123)    | 10.2<br>(10)                   |

| Location      | DALY number             |                          | DALY per 100,000 persons |                          | Age-standardized DALY per 100,000 persons |                          |                   |                                |                     |                                |                           |                                |                     |                                |
|---------------|-------------------------|--------------------------|--------------------------|--------------------------|-------------------------------------------|--------------------------|-------------------|--------------------------------|---------------------|--------------------------------|---------------------------|--------------------------------|---------------------|--------------------------------|
|               |                         |                          |                          |                          | All causes                                |                          | Due to diabetes   |                                | Due to hypertension |                                | Due to glomerulonephritis |                                | Due to other causes |                                |
|               | 2016 (UI)               | Percent change from 2002 | 2016 (UI)                | Percent change from 2002 | 2016 (UI)                                 | Percent change from 2002 | 2016 (UI)         | Percent change from 2002 (PA*) | 2016 (UI)           | Percent change from 2002 (PA*) | 2016 (UI)                 | Percent change from 2002 (PA*) | 2016 (UI)           | Percent change from 2002 (PA*) |
| Maine         | 4202<br>(3669, 4753)    | 36.3                     | 621<br>(542, 702)        | 33.3                     | 357<br>(311, 409)                         | 14.4                     | 187<br>(159, 218) | 16.3<br>(58.3)                 | 71<br>(57, 84)      | 17.5<br>(23.3)                 | 42 (33, 51)               | 9.1 (7.7)                      | 58<br>(46, 70)      | 9.1<br>(10.7)                  |
| Maryland      | 17040<br>(14964, 19306) | 38.8                     | 548<br>(481, 621)        | 25.5                     | 384<br>(336, 435)                         | 9.6                      | 205<br>(174, 237) | 11.6<br>(63.1)                 | 73<br>(59, 88)      | 14.1<br>(26.6)                 | 45 (36, 55)               | 3.2 (4.1)                      | 62<br>(50, 75)      | 3.5 (6.2)                      |
| Massachusetts | 17731<br>(15503, 20208) | 22                       | 505<br>(441, 575)        | 15.1                     | 326<br>(282, 375)                         | 7                        | 172<br>(146, 201) | 8.8<br>(65.1)                  | 65<br>(52, 78)      | 10.2<br>(28.2)                 | 37 (29, 46)               | 2.2 (3.8)                      | 52<br>(41, 64)      | 1.2 (2.9)                      |
| Michigan      | 31605<br>(27732, 35502) | 33.4                     | 627<br>(550, 705)        | 34.8                     | 410<br>(358, 463)                         | 15.6                     | 218<br>(187, 249) | 17.8<br>(59.4)                 | 79<br>(65, 94)      | 18.7<br>(22.4)                 | 47 (38, 58)               | 9 (7.1)                        | 66<br>(53, 80)      | 10.3<br>(11.1)                 |
| Minnesota     | 13642<br>(11829, 15420) | 44.8                     | 493<br>(427, 557)        | 32.1                     | 329<br>(284, 375)                         | 19.1                     | 171<br>(144, 199) | 22.2<br>(58.8)                 | 67<br>(54, 81)      | 23.3<br>(23.9)                 | 38 (30, 47)               | 10.8 (7)                       | 53<br>(42, 65)      | 11.4<br>(10.3)                 |
| Mississippi   | 13982<br>(12016, 15856) | 42.6                     | 908<br>(780, 1029)       | 36.6                     | 650<br>(558, 741)                         | 22.5                     | 350<br>(295, 405) | 26.5<br>(61.4)                 | 118<br>(95, 144)    | 26.5<br>(20.7)                 | 77 (61, 93)               | 12.7<br>(7.2)                  | 105<br>(84, 129)    | 13.8<br>(10.7)                 |
| Missouri      | 20256<br>(17788, 22638) | 43.2                     | 654<br>(574, 730)        | 34.4                     | 432<br>(376, 486)                         | 23.3                     | 230<br>(198, 267) | 27.4<br>(60.5)                 | 83<br>(68, 98)      | 25.4<br>(20.5)                 | 50 (39, 62)               | 14.5<br>(7.7)                  | 69<br>(56, 84)      | 15.3<br>(11.3)                 |

| Location      | DALY number             |                          | DALY per 100,000 persons |                          | Age-standardized DALY per 100,000 persons |                          |                   |                                |                     |                                |                           |                                |                     |                                |
|---------------|-------------------------|--------------------------|--------------------------|--------------------------|-------------------------------------------|--------------------------|-------------------|--------------------------------|---------------------|--------------------------------|---------------------------|--------------------------------|---------------------|--------------------------------|
|               |                         |                          |                          |                          | All causes                                |                          | Due to diabetes   |                                | Due to hypertension |                                | Due to glomerulonephritis |                                | Due to other causes |                                |
|               | 2016 (UI)               | Percent change from 2002 | 2016 (UI)                | Percent change from 2002 | 2016 (UI)                                 | Percent change from 2002 | 2016 (UI)         | Percent change from 2002 (PA*) | 2016 (UI)           | Percent change from 2002 (PA*) | 2016 (UI)                 | Percent change from 2002 (PA*) | 2016 (UI)           | Percent change from 2002 (PA*) |
| Montana       | 2490<br>(2132, 2867)    | 46.8                     | 483<br>(414, 556)        | 30                       | 313<br>(266, 361)                         | 17.1                     | 165<br>(138, 195) | 20.1<br>(60.4)                 | 60<br>(48, 73)      | 19.9<br>(21.7)                 | 37 (29, 46)               | 10.6<br>(7.8)                  | 51<br>(41, 63)      | 9.9 (10)                       |
| Nebraska      | 5242<br>(4594, 5905)    | 38.7                     | 550<br>(482, 619)        | 27.2                     | 376<br>(327, 427)                         | 21.3                     | 199<br>(169, 231) | 24.3<br>(58.8)                 | 74<br>(60, 88)      | 26.5<br>(23.4)                 | 43 (34, 53)               | 12.5<br>(7.3)                  | 60<br>(48, 73)      | 13<br>(10.5)                   |
| Nevada        | 8043<br>(7054, 9039)    | 69.8                     | 550<br>(482, 618)        | 23.8                     | 402<br>(352, 454)                         | 6.6                      | 215<br>(183, 248) | 9.1<br>(71.8)                  | 77<br>(63, 91)      | 7.4<br>(21.3)                  | 46 (37, 57)               | 2.3 (4.2)                      | 65<br>(52, 78)      | 1 (2.7)                        |
| New Hampshire | 3342<br>(2904, 3792)    | 46.6                     | 496<br>(431, 562)        | 39.3                     | 311<br>(269, 356)                         | 15.4                     | 163<br>(138, 189) | 16.5<br>(55.4)                 | 61<br>(48, 74)      | 17.9<br>(22.2)                 | 37 (29, 46)               | 13.6<br>(10.7)                 | 51<br>(40, 62)      | 10.6<br>(11.6)                 |
| New Jersey    | 24698<br>(21506, 28031) | 20.7                     | 539<br>(469, 612)        | 15.7                     | 354<br>(305, 402)                         | 5.5                      | 188<br>(159, 217) | 7.3<br>(67.1)                  | 69<br>(55, 82)      | 9.3<br>(30.8)                  | 41 (32, 51)               | 0.1 (0.2)                      | 57<br>(45, 69)      | -0.6<br>(1.9)                  |
| New Mexico    | 6166<br>(5315, 7090)    | 73.4                     | 590<br>(509, 679)        | 56.5                     | 405<br>(348, 468)                         | 31.7                     | 216<br>(182, 257) | 35.5<br>(58.1)                 | 75<br>(60, 91)      | 33.5<br>(19.4)                 | 48 (38, 59)               | 24.6<br>(9.8)                  | 66<br>(53, 80)      | 23.4<br>(12.8)                 |
| New York      | 49601<br>(42620, 57366) | 24.7                     | 487<br>(418, 563)        | 21.3                     | 328<br>(280, 382)                         | 10.2                     | 175<br>(146, 206) | 11.6<br>(59.6)                 | 62<br>(50, 76)      | 15.1<br>(27)                   | 39 (30, 49)               | 4.9 (5.9)                      | 53<br>(42, 66)      | 4.5 (7.4)                      |

| Location       | DALY number             |                          | DALY per 100,000 persons |                          | Age-standardized DALY per 100,000 persons |                          |                   |                                |                     |                                |                           |                                |                     |                                |
|----------------|-------------------------|--------------------------|--------------------------|--------------------------|-------------------------------------------|--------------------------|-------------------|--------------------------------|---------------------|--------------------------------|---------------------------|--------------------------------|---------------------|--------------------------------|
|                |                         |                          |                          |                          | All causes                                |                          | Due to diabetes   |                                | Due to hypertension |                                | Due to glomerulonephritis |                                | Due to other causes |                                |
|                | 2016 (UI)               | Percent change from 2002 | 2016 (UI)                | Percent change from 2002 | 2016 (UI)                                 | Percent change from 2002 | 2016 (UI)         | Percent change from 2002 (PA*) | 2016 (UI)           | Percent change from 2002 (PA*) | 2016 (UI)                 | Percent change from 2002 (PA*) | 2016 (UI)           | Percent change from 2002 (PA*) |
| North Carolina | 36091<br>(31922, 40346) | 62.3                     | 696<br>(615, 778)        | 33                       | 478<br>(421, 534)                         | 18.4                     | 257<br>(223, 294) | 21.3<br>(60.8)                 | 90<br>(74, 108)     | 20.3<br>(20.6)                 | 55 (44, 66)               | 12.8<br>(8.3)                  | 76<br>(61, 91)      | 11.3<br>(10.4)                 |
| North Dakota   | 1809<br>(1562, 2067)    | 37.1                     | 483<br>(417, 552)        | 16.8                     | 340<br>(292, 390)                         | 21.9                     | 179<br>(151, 210) | 24.9<br>(58.5)                 | 65<br>(51, 78)      | 24.4<br>(20.7)                 | 41 (32, 50)               | 14.4<br>(8.3)                  | 56<br>(44, 68)      | 15.8<br>(12.4)                 |
| Ohio           | 40070<br>(35665, 44685) | 34                       | 677<br>(603, 755)        | 32.7                     | 442<br>(393, 496)                         | 19                       | 236<br>(204, 270) | 21.7<br>(59.3)                 | 85<br>(70, 103)     | 22.7<br>(22.3)                 | 51 (41, 62)               | 12.4<br>(7.9)                  | 70<br>(57, 86)      | 11.8<br>(10.5)                 |
| Oklahoma       | 12892<br>(11437, 14421) | 55.3                     | 653<br>(579, 730)        | 39.1                     | 466<br>(413, 522)                         | 33.2                     | 249<br>(215, 288) | 37.8<br>(58.8)                 | 87<br>(72, 104)     | 36.2<br>(19.9)                 | 54 (44, 66)               | 23.6<br>(8.9)                  | 75<br>(62, 90)      | 23.7<br>(12.4)                 |
| Oregon         | 9957<br>(8650, 11248)   | 55.2                     | 488<br>(424, 551)        | 34.5                     | 316<br>(271, 359)                         | 18.9                     | 167<br>(141, 194) | 20.6<br>(56.8)                 | 62<br>(50, 75)      | 23.2<br>(23.3)                 | 36 (29, 45)               | 13.6<br>(8.7)                  | 50<br>(40, 62)      | 12.4<br>(11.1)                 |
| Pennsylvania   | 42700<br>(37464, 47841) | 22.4                     | 655<br>(575, 734)        | 19.3                     | 399<br>(349, 451)                         | 11.9                     | 211<br>(181, 243) | 13.9<br>(60.5)                 | 78<br>(63, 93)      | 16<br>(25.3)                   | 46 (37, 56)               | 6.1 (6.2)                      | 64<br>(51, 78)      | 5.7 (8.1)                      |
| Rhode Island   | 2733<br>(2335, 3141)    | 25.4                     | 502<br>(429, 577)        | 27.1                     | 317<br>(269, 365)                         | 17                       | 168<br>(141, 198) | 18.9<br>(57.8)                 | 61<br>(49, 75)      | 22.9<br>(24.9)                 | 37 (28, 46)               | 9.2 (6.7)                      | 51<br>(40, 63)      | 10.6<br>(10.6)                 |

| Location       | DALY number             |                          | DALY per 100,000 persons |                          | Age-standardized DALY per 100,000 persons |                          |                   |                                |                     |                                |                           |                                |                     |                                |
|----------------|-------------------------|--------------------------|--------------------------|--------------------------|-------------------------------------------|--------------------------|-------------------|--------------------------------|---------------------|--------------------------------|---------------------------|--------------------------------|---------------------|--------------------------------|
|                |                         |                          |                          |                          | All causes                                |                          | Due to diabetes   |                                | Due to hypertension |                                | Due to glomerulonephritis |                                | Due to other causes |                                |
|                | 2016 (UI)               | Percent change from 2002 | 2016 (UI)                | Percent change from 2002 | 2016 (UI)                                 | Percent change from 2002 | 2016 (UI)         | Percent change from 2002 (PA*) | 2016 (UI)           | Percent change from 2002 (PA*) | 2016 (UI)                 | Percent change from 2002 (PA*) | 2016 (UI)           | Percent change from 2002 (PA*) |
| South Carolina | 19466<br>(16840, 22329) | 63.2                     | 768<br>(664, 881)        | 35.7                     | 514<br>(441, 591)                         | 17.1                     | 276<br>(233, 324) | 19.7<br>(60.5)                 | 98<br>(78, 118)     | 21.8<br>(23.3)                 | 59 (46, 73)               | 9.5 (6.8)                      | 82<br>(66, 99)      | 9.5 (9.4)                      |
| South Dakota   | 2201<br>(1876, 2511)    | 46.9                     | 512<br>(437, 585)        | 30.8                     | 346<br>(295, 397)                         | 24.6                     | 183<br>(153, 214) | 28.1<br>(58.8)                 | 64<br>(52, 78)      | 28.2<br>(20.8)                 | 42 (33, 51)               | 15.6<br>(8.2)                  | 57<br>(45, 71)      | 17.2<br>(12.2)                 |
| Tennessee      | 22976<br>(20179, 25722) | 61.3                     | 677<br>(594, 758)        | 41.2                     | 465<br>(408, 522)                         | 27.3                     | 248<br>(214, 283) | 31.5<br>(59.7)                 | 88<br>(71, 106)     | 32.1<br>(21.5)                 | 54 (43, 66)               | 16 (7.5)                       | 74<br>(61, 90)      | 17.9<br>(11.3)                 |
| Texas          | 80873<br>(71014, 91196) | 84.3                     | 577<br>(507, 651)        | 43.9                     | 466<br>(408, 526)                         | 29                       | 251<br>(216, 290) | 32.4<br>(58.6)                 | 89<br>(73, 107)     | 34.7<br>(21.9)                 | 53 (42, 65)               | 18.8 (8)                       | 74<br>(59, 90)      | 19.6<br>(11.5)                 |
| Utah           | 5871<br>(5132, 6648)    | 78.6                     | 390<br>(341, 441)        | 38.3                     | 360<br>(313, 408)                         | 23.3                     | 189<br>(160, 220) | 25.1<br>(55.8)                 | 72<br>(59, 86)      | 29<br>(23.8)                   | 41 (32, 50)               | 16.9<br>(8.7)                  | 57<br>(46, 70)      | 16<br>(11.7)                   |
| Vermont        | 1553<br>(1340, 1770)    | 34.2                     | 490<br>(423, 559)        | 32.1                     | 301<br>(258, 345)                         | 12.3                     | 157<br>(132, 184) | 13.9<br>(58.3)                 | 58<br>(47, 70)      | 14.9<br>(23)                   | 36 (29, 45)               | 9 (9.1)                        | 49<br>(39, 61)      | 6.9 (9.6)                      |
| Virginia       | 26202<br>(22967, 29284) | 50                       | 613<br>(537, 685)        | 30.2                     | 430<br>(376, 483)                         | 14.3                     | 229<br>(197, 265) | 16.9<br>(61.5)                 | 84<br>(69, 100)     | 18<br>(23.7)                   | 49 (39, 60)               | 6.9 (5.8)                      | 68<br>(55, 84)      | 7.7 (9.1)                      |



| Location      | DALY number             |                          | DALY per 100,000 persons |                          | Age-standardized DALY per 100,000 persons |                          |                   |                                |                     |                                |                           |                                |                     |                                |
|---------------|-------------------------|--------------------------|--------------------------|--------------------------|-------------------------------------------|--------------------------|-------------------|--------------------------------|---------------------|--------------------------------|---------------------------|--------------------------------|---------------------|--------------------------------|
|               |                         |                          |                          |                          | All causes                                |                          | Due to diabetes   |                                | Due to hypertension |                                | Due to glomerulonephritis |                                | Due to other causes |                                |
|               | 2016 (UI)               | Percent change from 2002 | 2016 (UI)                | Percent change from 2002 | 2016 (UI)                                 | Percent change from 2002 | 2016 (UI)         | Percent change from 2002 (PA*) | 2016 (UI)           | Percent change from 2002 (PA*) | 2016 (UI)                 | Percent change from 2002 (PA*) | 2016 (UI)           | Percent change from 2002 (PA*) |
| Washington    | 15790<br>(13602, 18012) | 70.8                     | 438<br>(377, 500)        | 43.7                     | 306<br>(261, 350)                         | 25.8                     | 162<br>(135, 189) | 28.4<br>(57)                   | 60<br>(48, 72)      | 32<br>(23.2)                   | 35 (28, 44)               | 16.7 (8)                       | 49<br>(39, 60)      | 17.9<br>(11.8)                 |
| West Virginia | 8073<br>(7174, 9088)    | 38                       | 871<br>(774, 981)        | 37.4                     | 538<br>(478, 610)                         | 28.8                     | 287<br>(249, 330) | 32.6<br>(58.6)                 | 101<br>(83, 122)    | 30.6<br>(19.7)                 | 63 (51, 76)               | 21.3<br>(9.2)                  | 87<br>(71, 105)     | 20.8<br>(12.4)                 |
| Wisconsin     | 16696<br>(14718, 18743) | 45.1                     | 575<br>(507, 646)        | 37.2                     | 370<br>(324, 418)                         | 22.6                     | 195<br>(166, 224) | 25.2<br>(57.4)                 | 74<br>(60, 88)      | 27.9<br>(23.6)                 | 42 (34, 52)               | 14.1<br>(7.7)                  | 59<br>(47, 72)      | 15<br>(11.3)                   |
| Wyoming       | 1232<br>(1056, 1425)    | 44.4                     | 431<br>(369, 499)        | 25                       | 314<br>(267, 363)                         | 15.6                     | 167<br>(139, 196) | 18.1<br>(60.3)                 | 59<br>(47, 72)      | 18.6<br>(21.9)                 | 38 (30, 46)               | 9.7 (7.9)                      | 51<br>(41, 63)      | 9 (10)                         |

DALY: Disability Adjusted Life Year

UI is the uncertainty interval, it reflects the certainty of an estimate based on data availability, studies size and consistency across data sources

\*Percentage attributed to overall rate is the proportion of overall age-standardized rate change attributed by each of the following four causes: diabetes, hypertension, glomerulonephritis and other causes

**eTable 6b:** Number and age-standardized rate for overall DALY due to CKD and by cause in males, with percentage change from 2002 to 2016 for the United States and by state and district.

| Location      | DALY number                 |                          | DALY per 100,000 persons |                          | Age-standardized DALY per 100,000 persons |                          |                   |                                |                     |                                |                           |                                |                     |                                |
|---------------|-----------------------------|--------------------------|--------------------------|--------------------------|-------------------------------------------|--------------------------|-------------------|--------------------------------|---------------------|--------------------------------|---------------------------|--------------------------------|---------------------|--------------------------------|
|               |                             |                          |                          |                          | All causes                                |                          | Due to diabetes   |                                | Due to hypertension |                                | Due to glomerulonephritis |                                | Due to other causes |                                |
|               | 2016 (UI)                   | Percent change from 2002 | 2016 (UI)                | Percent change from 2002 | 2016 (UI)                                 | Percent change from 2002 | 2016 (UI)         | Percent change from 2002 (PA*) | 2016 (UI)           | Percent change from 2002 (PA*) | 2016 (UI)                 | Percent change from 2002 (PA*) | 2016 (UI)           | Percent change from 2002 (PA*) |
| United States | 981097<br>(889245, 1073356) | 59                       | 617<br>(559, 675)        | 41.3                     | 487<br>(440, 534)                         | 18.3                     | 280<br>(248, 312) | 21.7<br>(66.3)                 | 91 (76, 107)        | 19.6<br>(19.8)                 | 44 (35, 53)               | 10.8 (5.7)                     | 72<br>(60, 87)      | 9.5 (8.3)                      |
| Alabama       | 20041<br>(17336, 22865)     | 51.9                     | 852<br>(737, 972)        | 39.9                     | 662<br>(573, 750)                         | 17.6                     | 383<br>(327, 441) | 21.8<br>(69.1)                 | 117 (97, 143)       | 14.5 (15)                      | 61 (48, 75)               | 12.8 (7)                       | 100<br>(80, 122)    | 9.7 (8.9)                      |
| Alaska        | 1462<br>(1240, 1678)        | 81.6                     | 377<br>(320, 433)        | 56.8                     | 374<br>(321, 427)                         | 24.3                     | 211<br>(176, 246) | 27.5<br>(62.4)                 | 70 (58, 85)         | 28.9<br>(21.6)                 | 35 (28, 44)               | 15.3 (6.4)                     | 57<br>(46, 69)      | 14 (9.6)                       |
| Arizona       | 19178<br>(16715, 21659)     | 81.1                     | 559<br>(487, 631)        | 42.2                     | 424<br>(368, 479)                         | 16.8                     | 245<br>(210, 283) | 21.5<br>(71.1)                 | 76 (62, 91)         | 15.6<br>(16.8)                 | 39 (31, 47)               | 7.6 (4.5)                      | 64<br>(51, 78)      | 7.8 (7.6)                      |
| Arkansas      | 11295<br>(9997, 12671)      | 59.6                     | 773<br>(684, 867)        | 44.3                     | 596<br>(529, 669)                         | 25.9                     | 345<br>(300, 391) | 30.8<br>(66.1)                 | 107 (89, 128)       | 26.9<br>(18.5)                 | 55 (44, 66)               | 15.5 (6)                       | 90<br>(74, 109)     | 14.9<br>(9.5)                  |
| California    | 97062<br>(83648, 110459)    | 71.6                     | 495<br>(427, 564)        | 52.5                     | 417<br>(359, 475)                         | 24.5                     | 241<br>(205, 280) | 28.2<br>(64.6)                 | 77 (63, 94)         | 29.8<br>(21.7)                 | 37 (29, 46)               | 13.1 (5.3)                     | 61<br>(50, 76)      | 12.8<br>(8.5)                  |

| Location             | DALY number             |                          | DALY per 100,000 persons |                          | Age-standardized DALY per 100,000 persons |                          |                   |                                |                     |                                |                           |                                |                     |                                |
|----------------------|-------------------------|--------------------------|--------------------------|--------------------------|-------------------------------------------|--------------------------|-------------------|--------------------------------|---------------------|--------------------------------|---------------------------|--------------------------------|---------------------|--------------------------------|
|                      |                         |                          |                          |                          | All causes                                |                          | Due to diabetes   |                                | Due to hypertension |                                | Due to glomerulonephritis |                                | Due to other causes |                                |
|                      | 2016 (UI)               | Percent change from 2002 | 2016 (UI)                | Percent change from 2002 | 2016 (UI)                                 | Percent change from 2002 | 2016 (UI)         | Percent change from 2002 (PA*) | 2016 (UI)           | Percent change from 2002 (PA*) | 2016 (UI)                 | Percent change from 2002 (PA*) | 2016 (UI)           | Percent change from 2002 (PA*) |
| Colorado             | 11848<br>(10228, 13405) | 78.5                     | 428<br>(369, 484)        | 45.8                     | 364<br>(315, 411)                         | 15.2                     | 206<br>(175, 239) | 18.9<br>(68.1)                 | 70 (58, 85)         | 14.5<br>(18.5)                 | 33 (26, 41)               | 8.9 (5.6)                      | 55<br>(44, 67)      | 7.4 (7.8)                      |
| Connecticut          | 9551<br>(8284, 10969)   | 35.4                     | 547<br>(475, 629)        | 29.7                     | 407<br>(353, 466)                         | 11.6                     | 231<br>(196, 270) | 13.8<br>(66.3)                 | 79 (65, 96)         | 13.5<br>(22.1)                 | 37 (29, 45)               | 5.9 (4.9)                      | 60<br>(48, 75)      | 4.9 (6.7)                      |
| Delaware             | 3179<br>(2786, 3568)    | 68                       | 688<br>(603, 773)        | 42.5                     | 505<br>(443, 566)                         | 15.6                     | 290<br>(249, 330) | 19.5<br>(69.4)                 | 91 (75, 109)        | 15.1<br>(17.6)                 | 47 (37, 58)               | 9.6 (6)                        | 76<br>(62, 93)      | 6.6 (6.9)                      |
| District of Columbia | 2045<br>(1775, 2343)    | 7.4                      | 628<br>(545, 719)        | -9.7                     | 600<br>(523, 686)                         | -10.3                    | 354<br>(304, 409) | -6.6<br>(36.3)                 | 105 (87, 127)       | -3.4 (5.4)                     | 53 (41, 65)               | -24.2<br>(24.4)                | 88<br>(71, 108)     | -21<br>(33.9)                  |
| Florida              | 68533<br>(59639, 78095) | 73.5                     | 686<br>(597, 781)        | 41.3                     | 457<br>(395, 519)                         | 24                       | 264<br>(226, 303) | 28.6<br>(66.4)                 | 82 (68, 98)         | 25 (18.6)                      | 42 (33, 51)               | 14.3 (5.9)                     | 68<br>(55, 84)      | 13.4<br>(9.1)                  |
| Georgia              | 35263<br>(30362, 40272) | 73.5                     | 705<br>(607, 805)        | 45.1                     | 615<br>(531, 700)                         | 14.5                     | 356<br>(302, 412) | 17.3<br>(67.3)                 | 114 (93, 138)       | 16.1<br>(20.2)                 | 55 (43, 67)               | 8.7 (5.6)                      | 91<br>(74, 111)     | 6.3 (6.9)                      |
| Hawaii               | 4150<br>(3640, 4698)    | 66.8                     | 568<br>(498, 643)        | 43.1                     | 431<br>(378, 490)                         | 24.6                     | 249<br>(216, 288) | 28.3<br>(64.4)                 | 79 (65, 94)         | 26.1<br>(19.2)                 | 39 (31, 48)               | 16.2 (6.4)                     | 64<br>(52, 79)      | 15.2<br>(10)                   |

| Location  | DALY number             |                          | DALY per 100,000 persons |                          | Age-standardized DALY per 100,000 persons |                          |                   |                                |                     |                                |                           |                                |                     |                                |
|-----------|-------------------------|--------------------------|--------------------------|--------------------------|-------------------------------------------|--------------------------|-------------------|--------------------------------|---------------------|--------------------------------|---------------------------|--------------------------------|---------------------|--------------------------------|
|           |                         |                          |                          |                          | All causes                                |                          | Due to diabetes   |                                | Due to hypertension |                                | Due to glomerulonephritis |                                | Due to other causes |                                |
|           | 2016 (UI)               | Percent change from 2002 | 2016 (UI)                | Percent change from 2002 | 2016 (UI)                                 | Percent change from 2002 | 2016 (UI)         | Percent change from 2002 (PA*) | 2016 (UI)           | Percent change from 2002 (PA*) | 2016 (UI)                 | Percent change from 2002 (PA*) | 2016 (UI)           | Percent change from 2002 (PA*) |
| Idaho     | 4143<br>(3550, 4727)    | 93.2                     | 493<br>(422, 563)        | 54.1                     | 396<br>(339, 452)                         | 27.4                     | 224<br>(188, 261) | 31.1<br>(62.2)                 | 76 (62, 92)         | 30 (20.6)                      | 37 (29, 46)               | 18.8 (6.8)                     | 60<br>(48, 73)      | 17.5<br>(10.4)                 |
| Illinois  | 40535<br>(35843, 45093) | 37.7                     | 643<br>(568, 715)        | 34.2                     | 517<br>(456, 577)                         | 10.5                     | 296<br>(259, 336) | 13.2<br>(70.1)                 | 99 (82, 118)        | 14.2<br>(25.1)                 | 46 (37, 55)               | 2.7 (2.4)                      | 76<br>(61, 93)      | 1.6 (2.4)                      |
| Indiana   | 22999<br>(19823, 26122) | 56.6                     | 704<br>(607, 800)        | 44.9                     | 566<br>(488, 643)                         | 21.6                     | 322<br>(270, 372) | 25 (64)                        | 109 (88, 132)       | 21.1<br>(18.8)                 | 51 (40, 63)               | 16.4 (7.2)                     | 85<br>(69, 104)     | 13.6<br>(10.1)                 |
| Iowa      | 7967<br>(6922, 9017)    | 59.2                     | 512<br>(445, 579)        | 47.3                     | 384<br>(333, 436)                         | 30.7                     | 218<br>(187, 254) | 34.5<br>(61.9)                 | 75 (61, 89)         | 34.3<br>(21.1)                 | 35 (27, 43)               | 20.6 (6.6)                     | 57<br>(46, 70)      | 19.8<br>(10.5)                 |
| Kansas    | 8808<br>(7652, 9984)    | 51.1                     | 607<br>(528, 689)        | 39.8                     | 487<br>(424, 552)                         | 22.2                     | 277<br>(235, 322) | 26.2<br>(65.1)                 | 93 (76, 113)        | 21.3<br>(18.5)                 | 44 (35, 55)               | 15.7 (6.8)                     | 73<br>(58, 88)      | 13.3<br>(9.6)                  |
| Kentucky  | 16846<br>(14900, 18665) | 63.6                     | 773<br>(684, 857)        | 50.4                     | 607<br>(535, 671)                         | 24.7                     | 348<br>(299, 395) | 29.1<br>(65.1)                 | 114 (94, 137)       | 23 (17.7)                      | 54 (44, 66)               | 17.6 (6.8)                     | 90<br>(74, 109)     | 16<br>(10.4)                   |
| Louisiana | 20401<br>(18213, 22584) | 44                       | 892<br>(796, 987)        | 37.4                     | 741<br>(661, 819)                         | 15.3                     | 428<br>(373, 482) | 18.8<br>(68.9)                 | 134<br>(112, 158)   | 17.6<br>(20.3)                 | 67 (54, 81)               | 6.6 (4.2)                      | 111<br>(92, 134)    | 6.1 (6.5)                      |

| Location      | DALY number             |                          | DALY per 100,000 persons |                          | Age-standardized DALY per 100,000 persons |                          |                   |                                |                     |                                |                           |                                |                     |                                |
|---------------|-------------------------|--------------------------|--------------------------|--------------------------|-------------------------------------------|--------------------------|-------------------|--------------------------------|---------------------|--------------------------------|---------------------------|--------------------------------|---------------------|--------------------------------|
|               |                         |                          |                          |                          | All causes                                |                          | Due to diabetes   |                                | Due to hypertension |                                | Due to glomerulonephritis |                                | Due to other causes |                                |
|               | 2016 (UI)               | Percent change from 2002 | 2016 (UI)                | Percent change from 2002 | 2016 (UI)                                 | Percent change from 2002 | 2016 (UI)         | Percent change from 2002 (PA*) | 2016 (UI)           | Percent change from 2002 (PA*) | 2016 (UI)                 | Percent change from 2002 (PA*) | 2016 (UI)           | Percent change from 2002 (PA*) |
| Maine         | 4348<br>(3833, 4859)    | 54.3                     | 668<br>(589, 747)        | 49.4                     | 439<br>(387, 490)                         | 18.3                     | 247<br>(214, 282) | 20.7<br>(62.4)                 | 85 (70, 101)        | 17.4<br>(18.6)                 | 40 (32, 49)               | 14.6 (7.6)                     | 66<br>(54, 80)      | 13.3<br>(11.5)                 |
| Maryland      | 17378<br>(15438, 19524) | 43                       | 595<br>(528, 668)        | 28.4                     | 481<br>(427, 539)                         | 8.1                      | 277<br>(241, 315) | 10.6<br>(73.4)                 | 88 (73, 106)        | 11.7<br>(25.7)                 | 44 (35, 54)               | 0.1 (0.1)                      | 72<br>(59, 88)      | 0.4 (0.8)                      |
| Massachusetts | 19612<br>(17226, 22083) | 36.1                     | 591<br>(519, 666)        | 26.9                     | 452<br>(396, 510)                         | 8.6                      | 256<br>(219, 294) | 10.3<br>(66.9)                 | 90 (74, 108)        | 10.4<br>(23.7)                 | 40 (31, 49)               | 4.8 (5.1)                      | 66<br>(53, 81)      | 2.4 (4.3)                      |
| Michigan      | 32089<br>(28330, 35878) | 45.8                     | 658<br>(581, 736)        | 46.9                     | 495<br>(437, 553)                         | 17.8                     | 282<br>(245, 319) | 20.9<br>(65.4)                 | 94 (78, 113)        | 18.4<br>(19.5)                 | 45 (36, 55)               | 11.7 (6.3)                     | 74<br>(60, 89)      | 9.6 (8.7)                      |
| Minnesota     | 14260<br>(12457, 16097) | 58                       | 520<br>(455, 587)        | 43.3                     | 404<br>(352, 456)                         | 17.5                     | 226<br>(194, 261) | 20.8<br>(64.7)                 | 81 (66, 98)         | 17.3<br>(19.9)                 | 36 (28, 45)               | 11.5 (6.2)                     | 60<br>(49, 74)      | 10.2<br>(9.3)                  |
| Mississippi   | 13487<br>(11604, 15382) | 54.9                     | 931<br>(801, 1061)       | 47.9                     | 758<br>(654, 862)                         | 22.8                     | 442<br>(374, 510) | 27<br>(66.8)                   | 134<br>(110, 161)   | 22.5<br>(17.5)                 | 69 (54, 84)               | 15.1 (6.4)                     | 113<br>(92, 140)    | 13.1<br>(9.3)                  |
| Missouri      | 20789<br>(18416, 22978) | 55.5                     | 696<br>(617, 770)        | 43.9                     | 532<br>(472, 589)                         | 21.9                     | 305<br>(265, 347) | 26.1<br>(65.9)                 | 99 (84, 118)        | 21.7<br>(18.5)                 | 48 (39, 59)               | 14.2 (6.2)                     | 80<br>(65, 97)      | 12.7<br>(9.3)                  |

| Location      | DALY number             |                          | DALY per 100,000 persons |                          | Age-standardized DALY per 100,000 persons |                          |                   |                                |                     |                                |                           |                                |                     |                                |
|---------------|-------------------------|--------------------------|--------------------------|--------------------------|-------------------------------------------|--------------------------|-------------------|--------------------------------|---------------------|--------------------------------|---------------------------|--------------------------------|---------------------|--------------------------------|
|               |                         |                          |                          |                          | All causes                                |                          | Due to diabetes   |                                | Due to hypertension |                                | Due to glomerulonephritis |                                | Due to other causes |                                |
|               | 2016 (UI)               | Percent change from 2002 | 2016 (UI)                | Percent change from 2002 | 2016 (UI)                                 | Percent change from 2002 | 2016 (UI)         | Percent change from 2002 (PA*) | 2016 (UI)           | Percent change from 2002 (PA*) | 2016 (UI)                 | Percent change from 2002 (PA*) | 2016 (UI)           | Percent change from 2002 (PA*) |
| Montana       | 2596<br>(2196, 2980)    | 57.9                     | 498<br>(421, 571)        | 37.5                     | 356<br>(301, 408)                         | 15.3                     | 201<br>(167, 235) | 19.5<br>(69.6)                 | 66 (53, 79)         | 12.7<br>(15.8)                 | 34 (27, 42)               | 8.8 (5.8)                      | 55<br>(44, 66)      | 8.2 (8.8)                      |
| Nebraska      | 5237<br>(4641, 5860)    | 49.8                     | 550<br>(488, 616)        | 34.4                     | 441<br>(390, 494)                         | 19.3                     | 250<br>(214, 287) | 22.6<br>(64.3)                 | 85 (70, 102)        | 20 (19.9)                      | 40 (32, 49)               | 13.6 (6.7)                     | 66<br>(53, 80)      | 10.9<br>(9.1)                  |
| Nevada        | 9876<br>(8703, 11042)   | 71.5                     | 672<br>(593, 752)        | 28.5                     | 528<br>(464, 590)                         | 5.3                      | 304<br>(265, 347) | 8.4<br>(81.7)                  | 97 (80, 115)        | 3.8<br>(12.2)                  | 48 (38, 58)               | 1.2 (1.9)                      | 79<br>(64, 96)      | -1.5<br>(4.2)                  |
| New Hampshire | 3542<br>(3082, 4014)    | 67.7                     | 537<br>(468, 609)        | 58.3                     | 382<br>(331, 433)                         | 21                       | 214<br>(183, 248) | 23.3<br>(61)                   | 74 (61, 89)         | 21.5<br>(19.8)                 | 36 (29, 44)               | 18.4 (8.3)                     | 58<br>(47, 71)      | 14.2<br>(10.8)                 |
| New Jersey    | 26439<br>(23186, 29879) | 31.4                     | 604<br>(529, 682)        | 24.4                     | 470<br>(413, 532)                         | 6.8                      | 268<br>(231, 314) | 8.5<br>(69.9)                  | 91 (75, 110)        | 9.2<br>(25.4)                  | 42 (33, 52)               | 3.1 (4.2)                      | 70<br>(56, 85)      | 0.2 (0.5)                      |
| New Mexico    | 6518<br>(5624, 7424)    | 76.9                     | 634<br>(547, 722)        | 57.4                     | 490<br>(421, 559)                         | 29                       | 281<br>(239, 328) | 33.4<br>(63.9)                 | 88 (70, 106)        | 29.4<br>(18.1)                 | 46 (36, 57)               | 19.7 (6.9)                     | 75<br>(61, 92)      | 19.5<br>(11.1)                 |
| New York      | 50743<br>(43762, 57880) | 34.3                     | 527<br>(455, 601)        | 29                       | 414<br>(357, 473)                         | 10                       | 238<br>(201, 276) | 11.9<br>(67.4)                 | 77 (63, 93)         | 13 (23.7)                      | 37 (29, 46)               | 4 (3.8)                        | 62<br>(49, 75)      | 3.2 (5.1)                      |

| Location       | DALY number             |                          | DALY per 100,000 persons |                          | Age-standardized DALY per 100,000 persons |                          |                   |                                |                     |                                |                           |                                |                     |                                |
|----------------|-------------------------|--------------------------|--------------------------|--------------------------|-------------------------------------------|--------------------------|-------------------|--------------------------------|---------------------|--------------------------------|---------------------------|--------------------------------|---------------------|--------------------------------|
|                |                         |                          |                          |                          | All causes                                |                          | Due to diabetes   |                                | Due to hypertension |                                | Due to glomerulonephritis |                                | Due to other causes |                                |
|                | 2016 (UI)               | Percent change from 2002 | 2016 (UI)                | Percent change from 2002 | 2016 (UI)                                 | Percent change from 2002 | 2016 (UI)         | Percent change from 2002 (PA*) | 2016 (UI)           | Percent change from 2002 (PA*) | 2016 (UI)                 | Percent change from 2002 (PA*) | 2016 (UI)           | Percent change from 2002 (PA*) |
| North Carolina | 34971<br>(31115, 38815) | 72.7                     | 711<br>(633, 789)        | 43.2                     | 562<br>(499, 623)                         | 16.3                     | 325<br>(285, 365) | 19.5<br>(67.2)                 | 104 (87, 124)       | 17.2<br>(19.4)                 | 50 (40, 60)               | 9.9 (5.7)                      | 83<br>(68, 101)     | 7.9 (7.7)                      |
| North Dakota   | 1972<br>(1700, 2234)    | 55                       | 498<br>(429, 564)        | 25                       | 418<br>(361, 475)                         | 24.4                     | 236<br>(200, 273) | 27.2<br>(61.4)                 | 79 (65, 95)         | 25.7<br>(19.7)                 | 39 (31, 48)               | 20.2 (8)                       | 63<br>(51, 77)      | 16.4<br>(10.9)                 |
| Ohio           | 39909<br>(35535, 44272) | 47.9                     | 701<br>(625, 778)        | 44.3                     | 531<br>(472, 588)                         | 20.3                     | 305<br>(266, 344) | 24<br>(65.8)                   | 99 (82, 119)        | 18.4<br>(17.2)                 | 48 (38, 58)               | 15 (7)                         | 79<br>(65, 96)      | 12.9<br>(10.1)                 |
| Oklahoma       | 12844<br>(11458, 14276) | 66.5                     | 663<br>(591, 737)        | 47.8                     | 541<br>(482, 600)                         | 30.9                     | 311<br>(270, 351) | 36.1<br>(64.8)                 | 98 (81, 117)        | 29.2<br>(17.4)                 | 50 (39, 61)               | 21.4 (6.9)                     | 82<br>(67, 99)      | 20.8<br>(11)                   |
| Oregon         | 10248<br>(8942, 11525)  | 71.4                     | 512<br>(447, 576)        | 49                       | 374<br>(324, 419)                         | 22.5                     | 212<br>(181, 243) | 26.2<br>(64.1)                 | 72 (60, 88)         | 24.6<br>(20.8)                 | 33 (27, 41)               | 14.6 (6.2)                     | 55<br>(44, 68)      | 12.4<br>(8.9)                  |
| Pennsylvania   | 43706<br>(38685, 48880) | 32                       | 700<br>(619, 782)        | 25.9                     | 501<br>(443, 561)                         | 10.1                     | 286<br>(249, 325) | 12.9<br>(70.8)                 | 96 (80, 115)        | 10.8<br>(20.3)                 | 45 (36, 54)               | 4.4 (4.1)                      | 74<br>(60, 90)      | 3.1 (4.8)                      |
| Rhode Island   | 2769<br>(2387, 3156)    | 32.6                     | 541<br>(467, 617)        | 32.6                     | 405<br>(349, 463)                         | 14.5                     | 230<br>(194, 265) | 17.2<br>(65.8)                 | 77 (63, 93)         | 15.4<br>(20.1)                 | 37 (29, 45)               | 9.5 (6.3)                      | 61<br>(49, 75)      | 7 (7.8)                        |

| Location       | DALY number             |                          | DALY per 100,000 persons |                          | Age-standardized DALY per 100,000 persons |                          |                   |                                |                     |                                |                           |                                |                     |                                |
|----------------|-------------------------|--------------------------|--------------------------|--------------------------|-------------------------------------------|--------------------------|-------------------|--------------------------------|---------------------|--------------------------------|---------------------------|--------------------------------|---------------------|--------------------------------|
|                |                         |                          |                          |                          | All causes                                |                          | Due to diabetes   |                                | Due to hypertension |                                | Due to glomerulonephritis |                                | Due to other causes |                                |
|                | 2016 (UI)               | Percent change from 2002 | 2016 (UI)                | Percent change from 2002 | 2016 (UI)                                 | Percent change from 2002 | 2016 (UI)         | Percent change from 2002 (PA*) | 2016 (UI)           | Percent change from 2002 (PA*) | 2016 (UI)                 | Percent change from 2002 (PA*) | 2016 (UI)           | Percent change from 2002 (PA*) |
| South Carolina | 18806<br>(16408, 21348) | 68.4                     | 784<br>(684, 890)        | 40.1                     | 595<br>(520, 673)                         | 11.9                     | 344<br>(295, 398) | 14.7<br>(69.7)                 | 108 (88, 130)       | 13.7<br>(20.6)                 | 54 (42, 65)               | 5.8 (4.7)                      | 89<br>(71, 108)     | 3.7 (5)                        |
| South Dakota   | 2196<br>(1906, 2491)    | 53.6                     | 504<br>(438, 572)        | 33.4                     | 389<br>(338, 442)                         | 19                       | 219<br>(186, 254) | 23.1<br>(66.2)                 | 72 (59, 86)         | 17.4<br>(17.3)                 | 37 (30, 45)               | 13 (6.9)                       | 60<br>(48, 73)      | 11.1<br>(9.7)                  |
| Tennessee      | 22544<br>(19975, 25260) | 75.1                     | 697<br>(617, 781)        | 53                       | 545<br>(484, 612)                         | 27                       | 315<br>(273, 358) | 31.5<br>(65.1)                 | 100 (82, 117)       | 28.5 (19)                      | 49 (39, 60)               | 16.8 (6.1)                     | 81<br>(67, 100)     | 16.2<br>(9.8)                  |
| Texas          | 81993<br>(72109, 92415) | 100.3                    | 593<br>(521, 668)        | 56.4                     | 546<br>(481, 614)                         | 31.2                     | 317<br>(275, 362) | 35.8<br>(64.4)                 | 101 (83, 122)       | 32.1<br>(18.8)                 | 48 (38, 59)               | 20.4 (6.3)                     | 80<br>(65, 98)      | 20.6<br>(10.5)                 |
| Utah           | 6190<br>(5442, 6988)    | 88.1                     | 407<br>(358, 459)        | 45.2                     | 419<br>(369, 473)                         | 22.1                     | 237<br>(202, 272) | 25.9<br>(64.3)                 | 81 (67, 98)         | 23.2<br>(20.2)                 | 38 (30, 47)               | 13.2 (5.8)                     | 63<br>(51, 77)      | 13.3<br>(9.7)                  |
| Vermont        | 1529<br>(1337, 1736)    | 53.3                     | 497<br>(435, 564)        | 50.4                     | 347<br>(303, 394)                         | 18.6                     | 196<br>(169, 227) | 20.9<br>(62.1)                 | 67 (55, 81)         | 20 (20.5)                      | 32 (25, 40)               | 13.7 (7.2)                     | 52<br>(42, 64)      | 11.8<br>(10.2)                 |
| Virginia       | 26346<br>(23267, 29515) | 58                       | 635<br>(561, 712)        | 36.1                     | 516<br>(455, 577)                         | 11.8                     | 296<br>(258, 337) | 14.5<br>(69)                   | 99 (83, 117)        | 13.2<br>(21.2)                 | 45 (36, 56)               | 5.9 (4.7)                      | 76<br>(62, 92)      | 3.9 (5.2)                      |



| location      | DALY number             |                          | DALY per 100,000 persons |                          | Age-standardized DALY per 100,000 persons |                          |                   |                                |                     |                                |                           |                                |                     |                                |
|---------------|-------------------------|--------------------------|--------------------------|--------------------------|-------------------------------------------|--------------------------|-------------------|--------------------------------|---------------------|--------------------------------|---------------------------|--------------------------------|---------------------|--------------------------------|
|               |                         |                          |                          |                          | All causes                                |                          | Due to diabetes   |                                | Due to hypertension |                                | Due to glomerulonephritis |                                | Due to other causes |                                |
|               | 2016 (UI)               | Percent change from 2002 | 2016 (UI)                | Percent change from 2002 | 2016 (UI)                                 | Percent change from 2002 | 2016 (UI)         | Percent change from 2002 (PA*) | 2016 (UI)           | Percent change from 2002 (PA*) | 2016 (UI)                 | Percent change from 2002 (PA*) | 2016 (UI)           | Percent change from 2002 (PA*) |
| Washington    | 16114<br>(14066, 18206) | 88.8                     | 446<br>(389, 504)        | 57.4                     | 355<br>(309, 401)                         | 30.3                     | 202<br>(171, 231) | 34<br>(61.9)                   | 69 (56, 82)         | 34.3<br>(21.3)                 | 32 (25, 39)               | 19.1 (6.2)                     | 53<br>(43, 65)      | 19.9<br>(10.6)                 |
| West Virginia | 8434<br>(7496, 9390)    | 59.6                     | 932<br>(829, 1038)       | 55.6                     | 646<br>(575, 718)                         | 32.3                     | 370<br>(324, 422) | 36.7<br>(63)                   | 120 (99, 142)       | 32 (18.4)                      | 59 (47, 71)               | 23.9 (7.2)                     | 97<br>(80, 117)     | 22.8<br>(11.4)                 |
| Wisconsin     | 16902<br>(14904, 18882) | 54.3                     | 589<br>(520, 658)        | 44.6                     | 439<br>(388, 492)                         | 19                       | 247<br>(213, 281) | 22.3<br>(64.2)                 | 87 (72, 103)        | 20.3 (21)                      | 39 (31, 48)               | 11.6 (5.8)                     | 66<br>(53, 80)      | 10.6 (9)                       |
| Wyoming       | 1402<br>(1200, 1600)    | 63.9                     | 470<br>(402, 536)        | 38.3                     | 374<br>(320, 426)                         | 17.8                     | 212<br>(178, 245) | 22.1<br>(67.9)                 | 70 (56, 84)         | 17.1 (18)                      | 35 (28, 44)               | 9.7 (5.5)                      | 57<br>(46, 69)      | 9.3 (8.6)                      |

DALY: Disability Adjusted Life Year

UI is the uncertainty interval, it reflects the certainty of an estimate based on data availability, studies size and consistency across data sources

\*Percentage attributed to overall rate is the proportion of overall age-standardized rate change attributed by each of the following four causes: diabetes, hypertension, glomerulonephritis and other causes

**eTable 7:** Death due to CKD in the United States and by state and district in females and males.

**eTable 7a:** Number and age-standardized rate for overall Death due to CKD and by cause in females, with percentage change from 2002 to 2016 for the United States and by state and district.

| Location      | Death number            |                          | Death per 100,000 persons |                          | Age-standardized Death per 100,000 persons |                          |                 |                                |                     |                                |                           |                                |                     |                                |
|---------------|-------------------------|--------------------------|---------------------------|--------------------------|--------------------------------------------|--------------------------|-----------------|--------------------------------|---------------------|--------------------------------|---------------------------|--------------------------------|---------------------|--------------------------------|
|               |                         |                          |                           |                          | All causes                                 |                          | Due to diabetes |                                | Due to hypertension |                                | Due to glomerulonephritis |                                | Due to other causes |                                |
|               | 2016 (UI)               | Percent change from 2002 | 2016 (UI)                 | Percent change from 2002 | 2016 (UI)                                  | Percent change from 2002 | 2016 (UI)       | Percent change from 2002 (PA*) | 2016 (UI)           | Percent change from 2002 (PA*) | 2016 (UI)                 | Percent change from 2002 (PA*) | 2016 (UI)           | Percent change from 2002 (PA*) |
| United States | 41606<br>(40050, 43173) | 51.5                     | 25<br>(24, 26)            | 35.4                     | 14<br>(14, 15)                             | 18                       | 7 (6, 8)        | 19.3<br>(51.6)                 | 4 (3, 5)            | 21.3<br>(33.1)                 | 1 (1, 1)                  | 11.4 (5.6)                     | 2 (2, 2)            | 11.7<br>(9.7)                  |
| Alabama       | 889<br>(762, 1033)      | 33                       | 35<br>(30, 41)            | 22.8                     | 20<br>(17, 24)                             | 12.3                     | 10<br>(8, 12)   | 15.8<br>(62.1)                 | 6 (4, 7)            | 10.3<br>(23.4)                 | 2 (1, 2)                  | 8.4 (6.2)                      | 3 (2, 4)            | 6.8 (8.3)                      |
| Alaska        | 43 (36, 51)             | 111.2                    | 12<br>(10, 15)            | 89.2                     | 12<br>(10, 14)                             | 28.9                     | 6 (4, 7)        | 28.4<br>(46.9)                 | 3 (3, 4)            | 36.5<br>(35.2)                 | 1 (1, 1)                  | 20.3 (6.4)                     | 2 (1, 2)            | 22<br>(11.5)                   |
| Arizona       | 703<br>(614, 799)       | 77                       | 20<br>(18, 23)            | 37.7                     | 11<br>(10, 13)                             | 13.6                     | 6 (5, 7)        | 15.6<br>(55.1)                 | 3 (3, 4)            | 15<br>(30.8)                   | 1 (1, 1)                  | 8.4 (5.4)                      | 2 (1, 2)            | 7.9 (8.7)                      |
| Arkansas      | 529<br>(469, 593)       | 53.9                     | 35<br>(31, 39)            | 40.7                     | 19<br>(17, 22)                             | 32.2                     | 9 (8, 11)       | 34.9<br>(52.2)                 | 5 (4, 6)            | 34<br>(29.1)                   | 2 (1, 2)                  | 24.8 (7)                       | 3 (2, 3)            | 25<br>(11.8)                   |
| California    | 3644<br>(3143, 4206)    | 81.3                     | 18<br>(16, 21)            | 60.2                     | 11<br>(10, 13)                             | 29                       | 5 (5, 7)        | 28.4<br>(47.9)                 | 3 (3, 4)            | 37.6<br>(35.4)                 | 1 (1, 1)                  | 18.9 (5.8)                     | 2 (1, 2)            | 21.1<br>(10.9)                 |

| Location             | Death number         |                          | Death per 100,000 persons |                          | Age-standardized Death per 100,000 persons |                          |                 |                                |                     |                                |                           |                                |                     |                                |
|----------------------|----------------------|--------------------------|---------------------------|--------------------------|--------------------------------------------|--------------------------|-----------------|--------------------------------|---------------------|--------------------------------|---------------------------|--------------------------------|---------------------|--------------------------------|
|                      |                      |                          |                           |                          | All causes                                 |                          | Due to diabetes |                                | Due to hypertension |                                | Due to glomerulonephritis |                                | Due to other causes |                                |
|                      | 2016 (UI)            | Percent change from 2002 | 2016 (UI)                 | Percent change from 2002 | 2016 (UI)                                  | Percent change from 2002 | 2016 (UI)       | Percent change from 2002 (PA*) | 2016 (UI)           | Percent change from 2002 (PA*) | 2016 (UI)                 | Percent change from 2002 (PA*) | 2016 (UI)           | Percent change from 2002 (PA*) |
| Colorado             | 440<br>(393, 497)    | 62.4                     | 16<br>(14, 18)            | 32.1                     | 10<br>(9, 12)                              | 6.6                      | 5 (4, 6)        | 7.1<br>(50.6)                  | 3 (3, 4)            | 10<br>(44.8)                   | 1 (1, 1)                  | 1.2 (1.5)                      | 1 (1, 2)            | 1.4 (3.1)                      |
| Connecticut          | 406<br>(347, 469)    | 28.6                     | 22<br>(19, 26)            | 24.5                     | 10<br>(9, 12)                              | 7.5                      | 5 (4, 6)        | 6.4<br>(41.3)                  | 3 (2, 4)            | 13.9<br>(52.6)                 | 1 (1, 1)                  | 1.3 (1.5)                      | 1 (1, 2)            | 2.3 (4.6)                      |
| Delaware             | 130<br>(116, 146)    | 70.9                     | 27<br>(24, 30)            | 44.3                     | 14<br>(12, 16)                             | 18                       | 7 (6, 8)        | 19.2<br>(51.3)                 | 4 (3, 5)            | 21.1<br>(32.7)                 | 1 (1, 2)                  | 12.1 (6)                       | 2 (2, 2)            | 11.9<br>(10)                   |
| District of Columbia | 74 (63, 86)          | 1                        | 21<br>(18, 24)            | -13.9                    | 15<br>(13, 18)                             | -8.5                     | 8 (6, 9)        | -7.3<br>(43.5)                 | 4 (3, 5)            | -4.3<br>(12.4)                 | 1 (1, 2)                  | -16.1<br>(17.8)                | 2 (2, 3)            | -14.6<br>(26.3)                |
| Florida              | 2478<br>(2172, 2847) | 63.3                     | 24<br>(21, 27)            | 33.3                     | 11<br>(9, 12)                              | 18.9                     | 5 (5, 6)        | 22.1<br>(56.3)                 | 3 (2, 4)            | 19.3<br>(28.3)                 | 1 (1, 1)                  | 11.9 (5.7)                     | 2 (1, 2)            | 12.2<br>(9.8)                  |
| Georgia              | 1535<br>(1313, 1777) | 57.5                     | 29<br>(25, 34)            | 29.4                     | 20<br>(17, 23)                             | 8.1                      | 10<br>(8, 12)   | 8.5<br>(51.6)                  | 6 (5, 7)            | 12.4<br>(42.2)                 | 2 (1, 2)                  | 1.9 (2.1)                      | 3 (2, 4)            | 2.2 (4.2)                      |
| Hawaii               | 158<br>(140, 177)    | 90.6                     | 22<br>(20, 25)            | 66.4                     | 10<br>(9, 12)                              | 22.4                     | 5 (4, 6)        | 24.9<br>(53.8)                 | 3 (2, 4)            | 24.4<br>(30.1)                 | 1 (1, 1)                  | 15 (6)                         | 1 (1, 2)            | 15.2<br>(10.2)                 |

| Location  | Death number         |                          | Death per 100,000 persons |                          | Age-standardized Death per 100,000 persons |                          |                 |                                |                     |                                |                           |                                |                     |                                |
|-----------|----------------------|--------------------------|---------------------------|--------------------------|--------------------------------------------|--------------------------|-----------------|--------------------------------|---------------------|--------------------------------|---------------------------|--------------------------------|---------------------|--------------------------------|
|           |                      |                          |                           |                          | All causes                                 |                          | Due to diabetes |                                | Due to hypertension |                                | Due to glomerulonephritis |                                | Due to other causes |                                |
|           | 2016 (UI)            | Percent change from 2002 | 2016 (UI)                 | Percent change from 2002 | 2016 (UI)                                  | Percent change from 2002 | 2016 (UI)       | Percent change from 2002 (PA*) | 2016 (UI)           | Percent change from 2002 (PA*) | 2016 (UI)                 | Percent change from 2002 (PA*) | 2016 (UI)           | Percent change from 2002 (PA*) |
| Idaho     | 169<br>(145, 196)    | 98.2                     | 20<br>(17, 23)            | 58.3                     | 12<br>(10, 14)                             | 36.7                     | 6 (5, 7)        | 38.1<br>(48.5)                 | 4 (3, 4)            | 39.9<br>(32.4)                 | 1 (1, 1)                  | 29.3 (6.9)                     | 2 (1, 2)            | 30<br>(12.2)                   |
| Illinois  | 1808<br>(1606, 2027) | 29.5                     | 28<br>(25, 31)            | 26.7                     | 15<br>(14, 17)                             | 9.7                      | 7 (6, 9)        | 9.9<br>(49.5)                  | 4 (4, 5)            | 14.8<br>(42.7)                 | 1 (1, 2)                  | 2.7 (2.4)                      | 2 (2, 3)            | 3.5 (5.4)                      |
| Indiana   | 1118<br>(955, 1299)  | 51.3                     | 33<br>(28, 39)            | 40.8                     | 18<br>(16, 22)                             | 26                       | 9 (7, 11)       | 27.6<br>(50.4)                 | 5 (4, 7)            | 28.6<br>(31.7)                 | 2 (1, 2)                  | 20 (6.7)                       | 3 (2, 3)            | 19.5<br>(11.2)                 |
| Iowa      | 373<br>(329, 426)    | 55.1                     | 24<br>(21, 27)            | 46.6                     | 11<br>(9, 12)                              | 41.3                     | 5 (4, 6)        | 42.8<br>(48.7)                 | 3 (3, 4)            | 45.5<br>(32.4)                 | 1 (1, 1)                  | 32.2 (6.8)                     | 2 (1, 2)            | 33.5<br>(12.2)                 |
| Kansas    | 413<br>(354, 481)    | 30.9                     | 28<br>(24, 33)            | 23.1                     | 15<br>(13, 17)                             | 18.4                     | 7 (6, 9)        | 21.4<br>(54.9)                 | 4 (3, 5)            | 18.1<br>(28.6)                 | 1 (1, 2)                  | 13.5 (6.3)                     | 2 (2, 3)            | 12.6<br>(10.2)                 |
| Kentucky  | 761<br>(679, 847)    | 50.8                     | 34<br>(30, 38)            | 40                       | 19<br>(17, 21)                             | 25.1                     | 9 (8, 11)       | 28 (53.1)                      | 6 (4, 7)            | 25.4<br>(28.9)                 | 2 (1, 2)                  | 19.7 (6.9)                     | 3 (2, 3)            | 18.8<br>(11.2)                 |
| Louisiana | 935<br>(834, 1038)   | 35                       | 39<br>(35, 43)            | 30.8                     | 25<br>(22, 27)                             | 15.3                     | 12<br>(11, 14)  | 16.4<br>(52.8)                 | 7 (5, 8)            | 18.6<br>(32.4)                 | 2 (2, 3)                  | 9.4 (5.6)                      | 4 (3, 4)            | 9.3 (9.2)                      |

| Location      | Death number         |                          | Death per 100,000 persons |                          | Age-standardized Death per 100,000 persons |                          |                 |                                |                     |                                |                           |                                |                     |                                |
|---------------|----------------------|--------------------------|---------------------------|--------------------------|--------------------------------------------|--------------------------|-----------------|--------------------------------|---------------------|--------------------------------|---------------------------|--------------------------------|---------------------|--------------------------------|
|               |                      |                          |                           |                          | All causes                                 |                          | Due to diabetes |                                | Due to hypertension |                                | Due to glomerulonephritis |                                | Due to other causes |                                |
|               | 2016 (UI)            | Percent change from 2002 | 2016 (UI)                 | Percent change from 2002 | 2016 (UI)                                  | Percent change from 2002 | 2016 (UI)       | Percent change from 2002 (PA*) | 2016 (UI)           | Percent change from 2002 (PA*) | 2016 (UI)                 | Percent change from 2002 (PA*) | 2016 (UI)           | Percent change from 2002 (PA*) |
| Maine         | 201<br>(180, 223)    | 40                       | 30<br>(27, 33)            | 36.9                     | 13<br>(12, 14)                             | 13.9                     | 6 (5, 7)        | 14.3<br>(48.5)                 | 4 (3, 5)            | 17.7<br>(37.7)                 | 1 (1, 1)                  | 7.9 (4.9)                      | 2 (1, 2)            | 8.3 (9)                        |
| Maryland      | 696<br>(622, 781)    | 45.2                     | 22<br>(20, 25)            | 31.3                     | 13<br>(12, 15)                             | 7.7                      | 6 (6, 7)        | 8.2<br>(51.9)                  | 4 (3, 4)            | 12.2<br>(42.7)                 | 1 (1, 1)                  | 1.4 (1.6)                      | 2 (1, 2)            | 2 (3.8)                        |
| Massachusetts | 858<br>(755, 967)    | 21.2                     | 24<br>(21, 28)            | 14.3                     | 12<br>(10, 13)                             | 3                        | 6 (5, 7)        | 2.9<br>(35.3)                  | 4 (3, 4)            | 7 (53.2)                       | 1 (1, 1)                  | -2.1 (4.6)                     | 2 (1, 2)            | -1.8<br>(6.9)                  |
| Michigan      | 1444<br>(1286, 1603) | 40.1                     | 29<br>(26, 32)            | 41.6                     | 15<br>(13, 16)                             | 15.2                     | 7 (6, 8)        | 16.4<br>(51.8)                 | 4 (3, 5)            | 17.8<br>(33.2)                 | 1 (1, 2)                  | 9.7 (5.6)                      | 2 (2, 3)            | 9.5 (9.4)                      |
| Minnesota     | 684<br>(607, 775)    | 52.3                     | 25<br>(22, 28)            | 38.9                     | 12<br>(11, 14)                             | 22.5                     | 6 (5, 7)        | 23.6 (48)                      | 4 (3, 5)            | 25.8<br>(35.3)                 | 1 (1, 1)                  | 15.7 (5.9)                     | 2 (1, 2)            | 16.3<br>(10.8)                 |
| Mississippi   | 624<br>(527, 719)    | 41.8                     | 41<br>(34, 47)            | 35.8                     | 24<br>(20, 28)                             | 21.5                     | 12<br>(10, 14)  | 24.2 (55)                      | 7 (5, 8)            | 22.9<br>(28.4)                 | 2 (2, 3)                  | 14.6 (6.3)                     | 3 (3, 4)            | 14.6<br>(10.3)                 |
| Missouri      | 944<br>(847, 1047)   | 42.7                     | 30<br>(27, 34)            | 33.9                     | 16<br>(14, 18)                             | 22.2                     | 8 (7, 9)        | 24.9<br>(53.4)                 | 5 (4, 6)            | 23<br>(29.7)                   | 1 (1, 2)                  | 16 (6.3)                       | 2 (2, 3)            | 15.7<br>(10.6)                 |

| Location      | Death number         |                          | Death per 100,000 persons |                          | Age-standardized Death per 100,000 persons |                          |                 |                                |                     |                                |                           |                                |                     |                                |
|---------------|----------------------|--------------------------|---------------------------|--------------------------|--------------------------------------------|--------------------------|-----------------|--------------------------------|---------------------|--------------------------------|---------------------------|--------------------------------|---------------------|--------------------------------|
|               |                      |                          |                           |                          | All causes                                 |                          | Due to diabetes |                                | Due to hypertension |                                | Due to glomerulonephritis |                                | Due to other causes |                                |
|               | 2016 (UI)            | Percent change from 2002 | 2016 (UI)                 | Percent change from 2002 | 2016 (UI)                                  | Percent change from 2002 | 2016 (UI)       | Percent change from 2002 (PA*) | 2016 (UI)           | Percent change from 2002 (PA*) | 2016 (UI)                 | Percent change from 2002 (PA*) | 2016 (UI)           | Percent change from 2002 (PA*) |
| Montana       | 106<br>(91, 122)     | 49.8                     | 20<br>(18, 24)            | 32.6                     | 10<br>(9, 12)                              | 16.8                     | 5 (4, 6)        | 18.7 (52)                      | 3 (2, 4)            | 17.9<br>(31.4)                 | 1 (1, 1)                  | 12.2 (6.4)                     | 1 (1, 2)            | 11.4<br>(10.2)                 |
| Nebraska      | 256<br>(227, 288)    | 44.8                     | 27<br>(24, 30)            | 32.8                     | 14<br>(12, 15)                             | 26.7                     | 6 (5, 8)        | 27.7<br>(48.9)                 | 4 (3, 5)            | 30.9<br>(33.6)                 | 1 (1, 1)                  | 19 (6.2)                       | 2 (1, 2)            | 20<br>(11.2)                   |
| Nevada        | 311<br>(273, 350)    | 68.3                     | 21<br>(19, 24)            | 22.8                     | 14<br>(12, 16)                             | -2.1                     | 7 (6, 8)        | -0.6<br>(12.7)                 | 4 (3, 5)            | -0.7<br>(9.2)                  | 1 (1, 1)                  | -6.7 (28.1)                    | 2 (2, 3)            | -7 (50)                        |
| New Hampshire | 146<br>(130, 164)    | 56.8                     | 22<br>(19, 24)            | 48.9                     | 10<br>(9, 12)                              | 14.5                     | 5 (4, 6)        | 14.8<br>(47.9)                 | 3 (3, 4)            | 17.3<br>(35.5)                 | 1 (1, 1)                  | 11 (6.5)                       | 1 (1, 2)            | 9.8<br>(10.1)                  |
| New Jersey    | 1099<br>(964, 1238)  | 21                       | 24<br>(21, 27)            | 15.9                     | 12<br>(11, 14)                             | 0.4                      | 6 (5, 7)        | 1 (16.6)                       | 4 (3, 4)            | 3.9<br>(40.4)                  | 1 (1, 1)                  | -5.4 (17)                      | 2 (1, 2)            | -4.8<br>(25.9)                 |
| New Mexico    | 248<br>(210, 291)    | 90.6                     | 24<br>(20, 28)            | 72                       | 14<br>(11, 16)                             | 36                       | 7 (5, 8)        | 39.1<br>(52.3)                 | 4 (3, 5)            | 35.9<br>(27.8)                 | 1 (1, 1)                  | 30.6 (7.6)                     | 2 (1, 2)            | 29.3<br>(12.3)                 |
| New York      | 1991<br>(1687, 2294) | 27.9                     | 20<br>(17, 23)            | 24.4                     | 10<br>(9, 12)                              | 7                        | 5 (4, 6)        | 6.6<br>(45.6)                  | 3 (2, 4)            | 13<br>(50.7)                   | 1 (1, 1)                  | 0.5 (0.6)                      | 1 (1, 2)            | 1.5 (3.1)                      |

| Location       | Death number         |                          | Death per 100,000 persons |                          | Age-standardized Death per 100,000 persons |                          |                 |                                |                     |                                |                           |                                |                     |                                |
|----------------|----------------------|--------------------------|---------------------------|--------------------------|--------------------------------------------|--------------------------|-----------------|--------------------------------|---------------------|--------------------------------|---------------------------|--------------------------------|---------------------|--------------------------------|
|                |                      |                          |                           |                          | All causes                                 |                          | Due to diabetes |                                | Due to hypertension |                                | Due to glomerulonephritis |                                | Due to other causes |                                |
|                | 2016 (UI)            | Percent change from 2002 | 2016 (UI)                 | Percent change from 2002 | 2016 (UI)                                  | Percent change from 2002 | 2016 (UI)       | Percent change from 2002 (PA*) | 2016 (UI)           | Percent change from 2002 (PA*) | 2016 (UI)                 | Percent change from 2002 (PA*) | 2016 (UI)           | Percent change from 2002 (PA*) |
| North Carolina | 1573<br>(1403, 1745) | 62.9                     | 30<br>(27, 34)            | 33.6                     | 18<br>(16, 19)                             | 15.2                     | 9 (7, 10)       | 17.5<br>(55.6)                 | 5 (4, 6)            | 16.2<br>(29.7)                 | 1 (1, 2)                  | 9.7 (5.6)                      | 2 (2, 3)            | 9.2 (9.1)                      |
| North Dakota   | 86 (75, 99)          | 39.4                     | 23<br>(20, 26)            | 18.7                     | 11<br>(10, 13)                             | 22.6                     | 5 (4, 6)        | 25.2<br>(51.9)                 | 3 (3, 4)            | 22.7<br>(30)                   | 1 (1, 1)                  | 17.3 (6.7)                     | 2 (1, 2)            | 17.2<br>(11.4)                 |
| Ohio           | 1848<br>(1675, 2047) | 37.9                     | 31<br>(28, 35)            | 36.4                     | 16<br>(15, 18)                             | 18.5                     | 8 (7, 9)        | 19.9 (52)                      | 5 (4, 6)            | 20.9<br>(31.9)                 | 1 (1, 2)                  | 12.9 (6.1)                     | 2 (2, 3)            | 12.3<br>(10)                   |
| Oklahoma       | 562<br>(503, 628)    | 54.9                     | 28<br>(25, 32)            | 38.8                     | 17<br>(15, 19)                             | 35.5                     | 8 (7, 10)       | 39.7<br>(53.4)                 | 5 (4, 6)            | 34.3<br>(27.3)                 | 1 (1, 2)                  | 29 (7.3)                       | 2 (2, 3)            | 28.1<br>(11.9)                 |
| Oregon         | 432<br>(384, 477)    | 63.8                     | 21<br>(19, 23)            | 41.9                     | 11<br>(10, 12)                             | 22.2                     | 5 (4, 6)        | 22.6 (48)                      | 3 (3, 4)            | 27<br>(35.6)                   | 1 (1, 1)                  | 15 (5.8)                       | 2 (1, 2)            | 15.8<br>(10.6)                 |
| Pennsylvania   | 2130<br>(1907, 2356) | 27.5                     | 33<br>(29, 36)            | 24.2                     | 15<br>(13, 16)                             | 11.7                     | 7 (6, 8)        | 12.1<br>(49.6)                 | 4 (4, 5)            | 15.8<br>(38.4)                 | 1 (1, 2)                  | 5.6 (4.2)                      | 2 (2, 3)            | 6.1 (7.8)                      |
| Rhode Island   | 122<br>(105, 140)    | 37.6                     | 22<br>(19, 26)            | 39.4                     | 10<br>(9, 12)                              | 24.8                     | 5 (4, 6)        | 24.6<br>(47.8)                 | 3 (2, 4)            | 31.2<br>(35.4)                 | 1 (1, 1)                  | 16.6 (5.9)                     | 1 (1, 2)            | 18.1<br>(10.9)                 |

| Location       | Death number         |                          | Death per 100,000 persons |                          | Age-standardized Death per 100,000 persons |                          |                 |                                |                     |                                |                           |                                |                     |                                |
|----------------|----------------------|--------------------------|---------------------------|--------------------------|--------------------------------------------|--------------------------|-----------------|--------------------------------|---------------------|--------------------------------|---------------------------|--------------------------------|---------------------|--------------------------------|
|                |                      |                          |                           |                          | All causes                                 |                          | Due to diabetes |                                | Due to hypertension |                                | Due to glomerulonephritis |                                | Due to other causes |                                |
|                | 2016 (UI)            | Percent change from 2002 | 2016 (UI)                 | Percent change from 2002 | 2016 (UI)                                  | Percent change from 2002 | 2016 (UI)       | Percent change from 2002 (PA*) | 2016 (UI)           | Percent change from 2002 (PA*) | 2016 (UI)                 | Percent change from 2002 (PA*) | 2016 (UI)           | Percent change from 2002 (PA*) |
| South Carolina | 865<br>(736, 1014)   | 69.4                     | 34<br>(29, 40)            | 40.8                     | 19<br>(16, 23)                             | 17.3                     | 10<br>(8, 12)   | 17.6<br>(49.7)                 | 6 (4, 7)            | 22.9<br>(35.9)                 | 2 (1, 2)                  | 10.1 (5.2)                     | 3 (2, 4)            | 10.6<br>(9.2)                  |
| South Dakota   | 100<br>(87, 114)     | 52.9                     | 23<br>(20, 27)            | 36.2                     | 11<br>(9, 13)                              | 28.3                     | 5 (4, 6)        | 30.6<br>(51.2)                 | 3 (3, 4)            | 29.7<br>(29.9)                 | 1 (1, 1)                  | 22 (7)                         | 2 (1, 2)            | 22<br>(11.8)                   |
| Tennessee      | 1002<br>(893, 1112)  | 72                       | 30<br>(26, 33)            | 50.6                     | 17<br>(15, 19)                             | 33.4                     | 8 (7, 10)       | 35.4<br>(51.1)                 | 5 (4, 6)            | 37.2<br>(30.8)                 | 1 (1, 2)                  | 24.5 (6.6)                     | 2 (2, 3)            | 25.4<br>(11.5)                 |
| Texas          | 3288<br>(2931, 3718) | 92.7                     | 23<br>(21, 27)            | 50.5                     | 17<br>(15, 19)                             | 33.4                     | 8 (7, 10)       | 35.8 (52)                      | 5 (4, 6)            | 36<br>(29.8)                   | 1 (1, 2)                  | 25 (6.6)                       | 2 (2, 3)            | 25.6<br>(11.5)                 |
| Utah           | 236<br>(210, 265)    | 89.9                     | 16<br>(14, 18)            | 47                       | 13<br>(12, 15)                             | 31.1                     | 6 (5, 7)        | 32.1<br>(48.3)                 | 4 (3, 5)            | 35.1<br>(33.4)                 | 1 (1, 1)                  | 23.9 (6.6)                     | 2 (1, 2)            | 24.5<br>(11.7)                 |
| Vermont        | 68 (60, 76)          | 45.8                     | 22<br>(19, 24)            | 43.6                     | 10<br>(9, 11)                              | 12.6                     | 5 (4, 5)        | 11.5 (43)                      | 3 (2, 4)            | 18.3<br>(42.4)                 | 1 (1, 1)                  | 7.8 (5.4)                      | 1 (1, 2)            | 7.8 (9.2)                      |
| Virginia       | 1171<br>(1046, 1306) | 57.8                     | 27<br>(24, 31)            | 37                       | 16<br>(14, 18)                             | 14.9                     | 8 (7, 9)        | 15.2<br>(49.1)                 | 5 (4, 6)            | 20.1<br>(37.7)                 | 1 (1, 2)                  | 7.6 (4.5)                      | 2 (2, 3)            | 8.6 (8.6)                      |



| Location      | Death number      |                          | Death per 100,000 persons |                          | Age-standardized Death per 100,000 persons |                          |                 |                                |                     |                                |                           |                                |                     |                                |
|---------------|-------------------|--------------------------|---------------------------|--------------------------|--------------------------------------------|--------------------------|-----------------|--------------------------------|---------------------|--------------------------------|---------------------------|--------------------------------|---------------------|--------------------------------|
|               |                   |                          |                           |                          | All causes                                 |                          | Due to diabetes |                                | Due to hypertension |                                | Due to glomerulonephritis |                                | Due to other causes |                                |
|               | 2016 (UI)         | Percent change from 2002 | 2016 (UI)                 | Percent change from 2002 | 2016 (UI)                                  | Percent change from 2002 | 2016 (UI)       | Percent change from 2002 (PA*) | 2016 (UI)           | Percent change from 2002 (PA*) | 2016 (UI)                 | Percent change from 2002 (PA*) | 2016 (UI)           | Percent change from 2002 (PA*) |
| Washington    | 647<br>(581, 718) | 92.1                     | 18<br>(16, 20)            | 61.6                     | 10<br>(9, 11)                              | 36.1                     | 5 (4, 6)        | 36.5<br>(47.8)                 | 3 (3, 4)            | 41.7<br>(33.8)                 | 1 (1, 1)                  | 27.7 (6.6)                     | 1 (1, 2)            | 28.6<br>(11.8)                 |
| West Virginia | 380<br>(339, 425) | 38.6                     | 41<br>(37, 46)            | 38                       | 20<br>(18, 23)                             | 27.8                     | 10<br>(8, 11)   | 30.4<br>(52.3)                 | 6 (5, 7)            | 28.8<br>(29.1)                 | 2 (1, 2)                  | 22.3 (7.1)                     | 3 (2, 4)            | 21.3<br>(11.5)                 |
| Wisconsin     | 833<br>(748, 926) | 58.2                     | 29<br>(26, 32)            | 49.6                     | 14<br>(12, 15)                             | 30.7                     | 7 (6, 8)        | 31.4<br>(47.8)                 | 4 (3, 5)            | 35.1<br>(33.8)                 | 1 (1, 1)                  | 23.6 (6.6)                     | 2 (2, 2)            | 24.3<br>(11.8)                 |
| Wyoming       | 48 (41, 55)       | 48.1                     | 17<br>(14, 19)            | 28.2                     | 10<br>(9, 12)                              | 14.6                     | 5 (4, 6)        | 15.7<br>(51.2)                 | 3 (2, 4)            | 17.6<br>(34.1)                 | 1 (1, 1)                  | 9.2 (5.6)                      | 1 (1, 2)            | 8.8 (9.1)                      |

UI is the uncertainty interval, it reflects the certainty of an estimate based on data availability, studies size and consistency across data sources  
\*Percentage attributed to overall rate is the proportion of overall age-standardized rate change attributed by each of the following four causes: diabetes, hypertension, glomerulonephritis and other causes

**eTable 7b:** Number and age-standardized rate for overall Death due to CKD and by cause in males, with percentage change from 2002 to 2016 for the United States and by state and district.

| Location      | Death number            |                          | Death per 100,000 persons |                          | Age-standardized Death per 100,000 persons |                          |                 |                                |                     |                                |                           |                                |                     |                                |
|---------------|-------------------------|--------------------------|---------------------------|--------------------------|--------------------------------------------|--------------------------|-----------------|--------------------------------|---------------------|--------------------------------|---------------------------|--------------------------------|---------------------|--------------------------------|
|               |                         |                          |                           |                          | All causes                                 |                          | Due to diabetes |                                | Due to hypertension |                                | Due to glomerulonephritis |                                | Due to other causes |                                |
|               | 2016 (UI)               | Percent change from 2002 | 2016 (UI)                 | Percent change from 2002 | 2016 (UI)                                  | Percent change from 2002 | 2016 (UI)       | Percent change from 2002 (PA*) | 2016 (UI)           | Percent change from 2002 (PA*) | 2016 (UI)                 | Percent change from 2002 (PA*) | 2016 (UI)           | Percent change from 2002 (PA*) |
| United States | 40933<br>(39545, 42288) | 65.9                     | 26<br>(25, 27)            | 47.4                     | 20<br>(19, 20)                             | 13.3                     | 10 (9, 11)      | 16.3<br>(62.4)                 | 6 (5, 7)            | 12.1<br>(26.1)                 | 1 (1, 2)                  | 8.6 (4.4)                      | 3 (2, 3)            | 6.7 (7.1)                      |
| Alabama       | 814<br>(699, 936)       | 48.6                     | 35<br>(30, 40)            | 36.9                     | 27<br>(23, 31)                             | 6.2                      | 14<br>(12, 17)  | 10.9<br>(89.2)                 | 7 (6, 9)            | 1.1 (4.8)                      | 2 (1, 2)                  | 4.1 (4.6)                      | 4 (3, 5)            | 0.6 (1.5)                      |
| Alaska        | 44 (38, 52)             | 123.1                    | 11<br>(10, 13)            | 92.6                     | 14<br>(12, 16)                             | 29.7                     | 7 (6, 9)        | 29.8<br>(51)                   | 4 (3, 5)            | 35.6<br>(33.5)                 | 1 (1, 1)                  | 21.3 (5)                       | 2 (1, 2)            | 21.7<br>(10.4)                 |
| Arizona       | 744<br>(651, 837)       | 85                       | 22<br>(19, 24)            | 45.3                     | 15<br>(13, 17)                             | 5.7                      | 8 (7, 9)        | 10.9<br>(94.8)                 | 4 (3, 5)            | 0.3 (1.4)                      | 1 (1, 1)                  | 2 (2.4)                        | 2 (2, 3)            | -0.6<br>(1.3)                  |
| Arkansas      | 477<br>(419, 532)       | 65                       | 33<br>(29, 36)            | 49.2                     | 24<br>(21, 27)                             | 21.2                     | 13<br>(11, 15)  | 25.9<br>(62.5)                 | 6 (5, 8)            | 17.5<br>(22.9)                 | 2 (1, 2)                  | 16.2 (5.4)                     | 3 (3, 4)            | 13.8<br>(9.3)                  |
| California    | 3771<br>(3248, 4310)    | 97.5                     | 19<br>(17, 22)            | 75.5                     | 16<br>(14, 18)                             | 29.2                     | 8 (7, 10)       | 32.3<br>(56.5)                 | 4 (4, 5)            | 29.5<br>(28.4)                 | 1 (1, 1)                  | 21.6 (5.1)                     | 2 (2, 3)            | 20.7<br>(10)                   |

| Location             | Death number         |                          | Death per 100,000 persons |                          | Age-standardized Death per 100,000 persons |                          |                 |                                |                     |                                |                           |                                |                     |                                |
|----------------------|----------------------|--------------------------|---------------------------|--------------------------|--------------------------------------------|--------------------------|-----------------|--------------------------------|---------------------|--------------------------------|---------------------------|--------------------------------|---------------------|--------------------------------|
|                      |                      |                          |                           |                          | All causes                                 |                          | Due to diabetes |                                | Due to hypertension |                                | Due to glomerulonephritis |                                | Due to other causes |                                |
|                      | 2016 (UI)            | Percent change from 2002 | 2016 (UI)                 | Percent change from 2002 | 2016 (UI)                                  | Percent change from 2002 | 2016 (UI)       | Percent change from 2002 (PA*) | 2016 (UI)           | Percent change from 2002 (PA*) | 2016 (UI)                 | Percent change from 2002 (PA*) | 2016 (UI)           | Percent change from 2002 (PA*) |
| Colorado             | 451<br>(403, 507)    | 88.9                     | 16<br>(15, 18)            | 54.3                     | 15<br>(13, 16)                             | 7.6                      | 7 (6, 9)        | 10.6<br>(68.4)                 | 4 (4, 5)            | 6.3<br>(25.2)                  | 1 (1, 1)                  | 3.7 (3.2)                      | 2 (1, 2)            | 1.8 (3.3)                      |
| Connecticut          | 428<br>(371, 496)    | 41                       | 25<br>(21, 28)            | 35.1                     | 17<br>(15, 19)                             | 6.2                      | 8 (7, 10)       | 7 (56.7)                       | 5 (4, 6)            | 8.4<br>(39.9)                  | 1 (1, 1)                  | 1.9 (2)                        | 2 (2, 3)            | 0.6 (1.4)                      |
| Delaware             | 130<br>(117, 145)    | 77.3                     | 28<br>(25, 31)            | 50.4                     | 20<br>(18, 22)                             | 8.3                      | 10 (9, 12)      | 11<br>(66.9)                   | 6 (5, 7)            | 7.6<br>(25.8)                  | 1 (1, 2)                  | 4.5 (3.8)                      | 3 (2, 3)            | 2.1 (3.5)                      |
| District of Columbia | 80 (69, 91)          | 9.2                      | 24<br>(21, 28)            | -8.2                     | 24<br>(21, 28)                             | -11                      | 13<br>(11, 16)  | -8.6<br>(41.7)                 | 6 (5, 8)            | -8.8<br>(19.8)                 | 2 (1, 2)                  | -20.8<br>(14.2)                | 3 (3, 4)            | -18.6<br>(24.4)                |
| Florida              | 2924<br>(2583, 3314) | 77.9                     | 29<br>(26, 33)            | 45                       | 17<br>(15, 19)                             | 17.6                     | 9 (8, 10)       | 22.9<br>(66.1)                 | 5 (4, 5)            | 12.8<br>(20.6)                 | 1 (1, 1)                  | 12.7 (5)                       | 2 (2, 3)            | 10.3<br>(8.3)                  |
| Georgia              | 1391<br>(1206, 1611) | 85.2                     | 28<br>(24, 32)            | 54.9                     | 26<br>(23, 30)                             | 9.6                      | 14<br>(12, 17)  | 11.9<br>(63.9)                 | 7 (6, 9)            | 9.6<br>(27.3)                  | 2 (1, 2)                  | 5.5 (3.9)                      | 3 (3, 4)            | 3.4 (4.9)                      |
| Hawaii               | 175<br>(157, 194)    | 80.5                     | 24<br>(22, 27)            | 54.9                     | 16<br>(14, 18)                             | 20.9                     | 8 (7, 10)       | 24.8<br>(60.3)                 | 4 (4, 5)            | 18.4<br>(25.1)                 | 1 (1, 1)                  | 16.2 (5.3)                     | 2 (2, 3)            | 13.9<br>(9.3)                  |

| Location  | Death number         |                          | Death per 100,000 persons |                          | Age-standardized Death per 100,000 persons |                          |                 |                                |                     |                                |                           |                                |                     |                                |
|-----------|----------------------|--------------------------|---------------------------|--------------------------|--------------------------------------------|--------------------------|-----------------|--------------------------------|---------------------|--------------------------------|---------------------------|--------------------------------|---------------------|--------------------------------|
|           |                      |                          |                           |                          | All causes                                 |                          | Due to diabetes |                                | Due to hypertension |                                | Due to glomerulonephritis |                                | Due to other causes |                                |
|           | 2016 (UI)            | Percent change from 2002 | 2016 (UI)                 | Percent change from 2002 | 2016 (UI)                                  | Percent change from 2002 | 2016 (UI)       | Percent change from 2002 (PA*) | 2016 (UI)           | Percent change from 2002 (PA*) | 2016 (UI)                 | Percent change from 2002 (PA*) | 2016 (UI)           | Percent change from 2002 (PA*) |
| Idaho     | 171<br>(149, 198)    | 113                      | 20<br>(18, 24)            | 70                       | 16<br>(14, 18)                             | 28.7                     | 8 (7, 9)        | 31.6<br>(54.3)                 | 5 (4, 6)            | 28.5<br>(29.8)                 | 1 (1, 1)                  | 23.1 (5.4)                     | 2 (2, 3)            | 21.5<br>(10.5)                 |
| Illinois  | 1801<br>(1609, 1997) | 45.9                     | 29<br>(26, 32)            | 42.3                     | 23<br>(20, 25)                             | 8.2                      | 12<br>(10, 13)  | 10 (62)                        | 7 (5, 8)            | 9.6<br>(33.3)                  | 1 (1, 2)                  | 2.3 (1.9)                      | 3 (2, 4)            | 1.6 (2.8)                      |
| Indiana   | 1031<br>(888, 1180)  | 62.3                     | 32<br>(27, 36)            | 50.1                     | 25<br>(22, 29)                             | 16.4                     | 13<br>(11, 15)  | 19.1<br>(58.2)                 | 7 (6, 9)            | 15.7<br>(28.1)                 | 2 (1, 2)                  | 12.5 (5.1)                     | 3 (3, 4)            | 10.1<br>(8.6)                  |
| Iowa      | 350<br>(311, 396)    | 72.5                     | 23<br>(20, 25)            | 59.6                     | 15<br>(14, 17)                             | 34                       | 8 (7, 9)        | 37.3<br>(54)                   | 5 (4, 6)            | 33.1<br>(29.6)                 | 1 (1, 1)                  | 28.4 (5.5)                     | 2 (2, 3)            | 26.6<br>(10.9)                 |
| Kansas    | 399<br>(342, 462)    | 51.7                     | 27<br>(24, 32)            | 40.4                     | 21<br>(18, 24)                             | 14.8                     | 11 (9, 13)      | 19<br>(63.4)                   | 6 (5, 7)            | 11.7<br>(23.8)                 | 1 (1, 2)                  | 11 (5)                         | 3 (2, 4)            | 8.4 (7.9)                      |
| Kentucky  | 721<br>(647, 805)    | 68.3                     | 33<br>(30, 37)            | 54.7                     | 27<br>(24, 30)                             | 17.9                     | 14<br>(12, 16)  | 21.8<br>(61.3)                 | 8 (6, 9)            | 14.9<br>(24.2)                 | 2 (1, 2)                  | 14.5 (5.4)                     | 4 (3, 4)            | 11.6<br>(9.1)                  |
| Louisiana | 864<br>(775, 957)    | 49.8                     | 38<br>(34, 42)            | 43                       | 32<br>(29, 36)                             | 12                       | 17<br>(15, 20)  | 14.5<br>(62.6)                 | 9 (7, 10)           | 12.4<br>(27.8)                 | 2 (2, 3)                  | 6.2 (3.6)                      | 4 (3, 5)            | 5 (6)                          |

| Location      | Death number         |                          | Death per 100,000 persons |                          | Age-standardized Death per 100,000 persons |                          |                 |                                |                     |                                |                           |                                |                     |                                |
|---------------|----------------------|--------------------------|---------------------------|--------------------------|--------------------------------------------|--------------------------|-----------------|--------------------------------|---------------------|--------------------------------|---------------------------|--------------------------------|---------------------|--------------------------------|
|               |                      |                          |                           |                          | All causes                                 |                          | Due to diabetes |                                | Due to hypertension |                                | Due to glomerulonephritis |                                | Due to other causes |                                |
|               | 2016 (UI)            | Percent change from 2002 | 2016 (UI)                 | Percent change from 2002 | 2016 (UI)                                  | Percent change from 2002 | 2016 (UI)       | Percent change from 2002 (PA*) | 2016 (UI)           | Percent change from 2002 (PA*) | 2016 (UI)                 | Percent change from 2002 (PA*) | 2016 (UI)           | Percent change from 2002 (PA*) |
| Maine         | 199<br>(178, 220)    | 62                       | 31<br>(27, 34)            | 56.8                     | 19<br>(17, 21)                             | 12.5                     | 9 (8, 11)       | 14<br>(55.2)                   | 6 (5, 7)            | 13.3<br>(32.2)                 | 1 (1, 2)                  | 9.2 (4.9)                      | 2 (2, 3)            | 7 (7.8)                        |
| Maryland      | 687<br>(621, 764)    | 52.8                     | 24<br>(21, 26)            | 37.2                     | 19<br>(17, 21)                             | 3.5                      | 10 (9, 11)      | 5.4<br>(60.2)                  | 5 (4, 6)            | 4.8<br>(28.5)                  | 1 (1, 2)                  | -1.9 (2.9)                     | 3 (2, 3)            | -2.7<br>(8.4)                  |
| Massachusetts | 911<br>(814, 1015)   | 39                       | 27<br>(25, 31)            | 29.7                     | 20<br>(18, 22)                             | 3                        | 10 (8, 12)      | 3.9<br>(49.9)                  | 6 (5, 7)            | 5.1<br>(39.3)                  | 1 (1, 2)                  | -1.2 (2)                       | 3 (2, 3)            | -2.5<br>(8.9)                  |
| Michigan      | 1384<br>(1246, 1534) | 53.9                     | 28<br>(26, 31)            | 55.1                     | 21<br>(19, 23)                             | 12.2                     | 11 (9, 12)      | 14.8<br>(60.8)                 | 6 (5, 7)            | 11.6<br>(27.6)                 | 1 (1, 2)                  | 8.3 (4.6)                      | 3 (2, 3)            | 6.1 (7)                        |
| Minnesota     | 668<br>(595, 751)    | 64.7                     | 24<br>(22, 27)            | 49.3                     | 18<br>(16, 20)                             | 12.6                     | 9 (8, 11)       | 15.6<br>(59.9)                 | 6 (5, 7)            | 11.3<br>(28.4)                 | 1 (1, 1)                  | 8.3 (4.3)                      | 2 (2, 3)            | 6.7 (7.4)                      |
| Mississippi   | 555<br>(473, 636)    | 56.3                     | 38<br>(33, 44)            | 49.2                     | 32<br>(27, 36)                             | 16                       | 17<br>(14, 20)  | 20.3<br>(66)                   | 8 (7, 10)           | 12.2<br>(20.7)                 | 2 (2, 3)                  | 12 (5.3)                       | 4 (3, 5)            | 9.2 (8.1)                      |
| Missouri      | 906<br>(812, 1011)   | 58.9                     | 30<br>(27, 34)            | 47.1                     | 22<br>(20, 25)                             | 15.4                     | 12<br>(10, 13)  | 19.4<br>(63.3)                 | 6 (5, 8)            | 12.5<br>(23.7)                 | 1 (1, 2)                  | 11.2 (4.9)                     | 3 (2, 4)            | 8.8 (8)                        |

| Location      | Death number      |                          | Death per 100,000 persons |                          | Age-standardized Death per 100,000 persons |                          |                 |                                |                     |                                |                           |                                |                     |                                |
|---------------|-------------------|--------------------------|---------------------------|--------------------------|--------------------------------------------|--------------------------|-----------------|--------------------------------|---------------------|--------------------------------|---------------------------|--------------------------------|---------------------|--------------------------------|
|               |                   |                          |                           |                          | All causes                                 |                          | Due to diabetes |                                | Due to hypertension |                                | Due to glomerulonephritis |                                | Due to other causes |                                |
|               | 2016 (UI)         | Percent change from 2002 | 2016 (UI)                 | Percent change from 2002 | 2016 (UI)                                  | Percent change from 2002 | 2016 (UI)       | Percent change from 2002 (PA*) | 2016 (UI)           | Percent change from 2002 (PA*) | 2016 (UI)                 | Percent change from 2002 (PA*) | 2016 (UI)           | Percent change from 2002 (PA*) |
| Montana       | 104 (88, 120)     | 56.5                     | 20 (17, 23)               | 36.3                     | 13 (11, 15)                                | 2.9                      | 7 (5, 8)        | 7.4 (80.9)                     | 4 (3, 5)            | -1.6 (11.2)                    | 1 (1, 1)                  | 0.8 (1.2)                      | 2 (1, 2)            | -2.1 (6.7)                     |
| Nebraska      | 235 (210, 262)    | 50.5                     | 25 (22, 27)               | 35                       | 18 (17, 21)                                | 13.6                     | 9 (8, 11)       | 16 (58.5)                      | 6 (4, 7)            | 13.5 (29.6)                    | 1 (1, 2)                  | 9.3 (4.5)                      | 2 (2, 3)            | 7.2 (7.4)                      |
| Nevada        | 390 (346, 433)    | 73.6                     | 27 (24, 29)               | 30.1                     | 21 (19, 24)                                | -6.5                     | 11 (10, 13)     | -3.4 (26.9)                    | 6 (5, 7)            | -8.8 (38.4)                    | 1 (1, 2)                  | -9.1 (9.5)                     | 3 (2, 4)            | -11.6 (25.1)                   |
| New Hampshire | 149 (133, 167)    | 87.1                     | 23 (20, 25)               | 76.6                     | 16 (14, 17)                                | 17.3                     | 8 (7, 9)        | 19.7 (55.8)                    | 5 (4, 6)            | 16.3 (28.7)                    | 1 (1, 1)                  | 15.3 (5.8)                     | 2 (2, 3)            | 12.1 (9.7)                     |
| New Jersey    | 1174 (1048, 1317) | 36.1                     | 27 (24, 30)               | 28.9                     | 20 (18, 23)                                | 1.8                      | 10 (9, 12)      | 2.7 (42.9)                     | 6 (5, 7)            | 3.9 (35.2)                     | 1 (1, 2)                  | -2.5 (5.4)                     | 3 (2, 3)            | -3.7 (16.5)                    |
| New Mexico    | 262 (225, 301)    | 94.4                     | 25 (22, 29)               | 72.9                     | 19 (16, 21)                                | 26.2                     | 10 (8, 12)      | 30.1 (58.5)                    | 5 (4, 6)            | 24.2 (25.8)                    | 1 (1, 2)                  | 20.8 (5.6)                     | 2 (2, 3)            | 18.6 (10.1)                    |
| New York      | 2016 (1760, 2306) | 38.9                     | 21 (18, 24)               | 33.4                     | 16 (14, 18)                                | 4.7                      | 8 (7, 10)       | 5.8 (57.8)                     | 4 (4, 5)            | 7 (37.8)                       | 1 (1, 1)                  | -0.5 (0.7)                     | 2 (2, 3)            | -1.4 (3.8)                     |

| Location       | Death number         |                          | Death per 100,000 persons |                          | Age-standardized Death per 100,000 persons |                          |                 |                                |                     |                                |                           |                                |                     |                                |
|----------------|----------------------|--------------------------|---------------------------|--------------------------|--------------------------------------------|--------------------------|-----------------|--------------------------------|---------------------|--------------------------------|---------------------------|--------------------------------|---------------------|--------------------------------|
|                |                      |                          |                           |                          | All causes                                 |                          | Due to diabetes |                                | Due to hypertension |                                | Due to glomerulonephritis |                                | Due to other causes |                                |
|                | 2016 (UI)            | Percent change from 2002 | 2016 (UI)                 | Percent change from 2002 | 2016 (UI)                                  | Percent change from 2002 | 2016 (UI)       | Percent change from 2002 (PA*) | 2016 (UI)           | Percent change from 2002 (PA*) | 2016 (UI)                 | Percent change from 2002 (PA*) | 2016 (UI)           | Percent change from 2002 (PA*) |
| North Carolina | 1437<br>(1298, 1582) | 81.7                     | 29<br>(26, 32)            | 50.7                     | 23<br>(21, 26)                             | 9.7                      | 12<br>(11, 14)  | 12.7<br>(67.5)                 | 6 (5, 8)            | 8.1<br>(23.4)                  | 2 (1, 2)                  | 5.7 (4)                        | 3 (2, 4)            | 3.4 (5)                        |
| North Dakota   | 87 (76, 99)          | 55.1                     | 22<br>(19, 25)            | 25.1                     | 17<br>(15, 19)                             | 22.2                     | 8 (7, 10)       | 24.1<br>(53.9)                 | 5 (4, 6)            | 22.5<br>(30.2)                 | 1 (1, 1)                  | 19.1 (5.7)                     | 2 (2, 3)            | 16.1<br>(10.2)                 |
| Ohio           | 1718<br>(1545, 1908) | 50.1                     | 30<br>(27, 34)            | 46.4                     | 22<br>(20, 25)                             | 11.6                     | 11<br>(10, 13)  | 15.2<br>(65.9)                 | 6 (5, 8)            | 8.9<br>(22.2)                  | 1 (1, 2)                  | 8.7 (5)                        | 3 (2, 4)            | 5.7 (6.9)                      |
| Oklahoma       | 521<br>(467, 582)    | 69                       | 27<br>(24, 30)            | 50                       | 22<br>(19, 24)                             | 24.7                     | 11<br>(10, 13)  | 29.9<br>(61.3)                 | 6 (5, 7)            | 20<br>(22.9)                   | 1 (1, 2)                  | 20.6 (5.7)                     | 3 (2, 4)            | 17.4<br>(10)                   |
| Oregon         | 433<br>(392, 482)    | 82.3                     | 22<br>(20, 24)            | 58.5                     | 15<br>(14, 17)                             | 20.8                     | 8 (6, 9)        | 23.9<br>(56.9)                 | 4 (4, 5)            | 20<br>(28.8)                   | 1 (1, 1)                  | 15.6 (4.9)                     | 2 (2, 2)            | 14 (9.4)                       |
| Pennsylvania   | 2039<br>(1842, 2265) | 34                       | 33<br>(29, 36)            | 27.8                     | 22<br>(19, 24)                             | 4                        | 11<br>(10, 13)  | 6 (65.5)                       | 6 (5, 8)            | 4.4<br>(27.5)                  | 1 (1, 2)                  | -0.6 (0.9)                     | 3 (2, 4)            | -2 (6.1)                       |
| Rhode Island   | 120<br>(105, 138)    | 36.6                     | 24<br>(21, 27)            | 36.6                     | 16<br>(14, 19)                             | 9.8                      | 8 (7, 10)       | 11<br>(56.4)                   | 5 (4, 6)            | 11.7<br>(35.2)                 | 1 (1, 1)                  | 4.8 (3.3)                      | 2 (2, 3)            | 3.5 (5.1)                      |

| Location       | Death number         |                          | Death per 100,000 persons |                          | Age-standardized Death per 100,000 persons |                          |                 |                                |                     |                                |                           |                                |                     |                                |
|----------------|----------------------|--------------------------|---------------------------|--------------------------|--------------------------------------------|--------------------------|-----------------|--------------------------------|---------------------|--------------------------------|---------------------------|--------------------------------|---------------------|--------------------------------|
|                |                      |                          |                           |                          | All causes                                 |                          | Due to diabetes |                                | Due to hypertension |                                | Due to glomerulonephritis |                                | Due to other causes |                                |
|                | 2016 (UI)            | Percent change from 2002 | 2016 (UI)                 | Percent change from 2002 | 2016 (UI)                                  | Percent change from 2002 | 2016 (UI)       | Percent change from 2002 (PA*) | 2016 (UI)           | Percent change from 2002 (PA*) | 2016 (UI)                 | Percent change from 2002 (PA*) | 2016 (UI)           | Percent change from 2002 (PA*) |
| South Carolina | 765<br>(666, 879)    | 77.4                     | 32<br>(28, 37)            | 47.6                     | 24<br>(21, 28)                             | 6.2                      | 13<br>(11, 15)  | 8.3<br>(69.4)                  | 7 (5, 8)            | 6.6<br>(28.8)                  | 2 (1, 2)                  | 1.4 (1.6)                      | 3 (2, 4)            | -0.1<br>(0.2)                  |
| South Dakota   | 92 (80, 105)         | 49.7                     | 21<br>(18, 24)            | 30                       | 15<br>(13, 17)                             | 9.7                      | 7 (6, 9)        | 13.4<br>(67.8)                 | 4 (3, 5)            | 7 (21.4)                       | 1 (1, 1)                  | 6.8 (4.7)                      | 2 (2, 3)            | 4.2 (6.1)                      |
| Tennessee      | 905<br>(806, 999)    | 88.3                     | 28<br>(25, 31)            | 64.5                     | 22<br>(20, 24)                             | 24.6                     | 12<br>(10, 13)  | 28.3<br>(58.6)                 | 6 (5, 7)            | 23.3<br>(26.4)                 | 1 (1, 2)                  | 18.8 (5.3)                     | 3 (2, 4)            | 16.9<br>(9.7)                  |
| Texas          | 3161<br>(2815, 3527) | 112.3                    | 23<br>(20, 25)            | 65.8                     | 22<br>(20, 25)                             | 26.9                     | 12<br>(10, 14)  | 32.1<br>(60.6)                 | 6 (5, 7)            | 22.5<br>(23.9)                 | 1 (1, 2)                  | 22.1 (5.5)                     | 3 (2, 4)            | 19.3<br>(10)                   |
| Utah           | 243<br>(217, 270)    | 99.3                     | 16<br>(14, 18)            | 53.8                     | 17<br>(15, 19)                             | 20                       | 9 (7, 10)       | 23.2<br>(57.1)                 | 5 (4, 6)            | 19<br>(28.7)                   | 1 (1, 1)                  | 14.8 (4.9)                     | 2 (2, 3)            | 13.3<br>(9.3)                  |
| Vermont        | 63 (56, 71)          | 70.5                     | 21<br>(18, 23)            | 67.2                     | 14<br>(12, 15)                             | 16.4                     | 7 (6, 8)        | 17.2<br>(52)                   | 4 (3, 5)            | 18.3<br>(33.6)                 | 1 (1, 1)                  | 12.5 (5.1)                     | 2 (1, 2)            | 10.9<br>(9.3)                  |
| Virginia       | 1102<br>(992, 1223)  | 66.9                     | 27<br>(24, 29)            | 43.8                     | 22<br>(20, 24)                             | 5.6                      | 11<br>(10, 13)  | 7.7<br>(67.6)                  | 6 (5, 8)            | 6.1<br>(30.1)                  | 1 (1, 2)                  | 0.8 (1)                        | 3 (2, 4)            | -0.5<br>(1.3)                  |



| Location      | Death number      |                          | Death per 100,000 persons |                          | Age-standardized Death per 100,000 persons |                          |                 |                                |                     |                                |                           |                                |                     |                                |
|---------------|-------------------|--------------------------|---------------------------|--------------------------|--------------------------------------------|--------------------------|-----------------|--------------------------------|---------------------|--------------------------------|---------------------------|--------------------------------|---------------------|--------------------------------|
|               |                   |                          |                           |                          | All causes                                 |                          | Due to diabetes |                                | Due to hypertension |                                | Due to glomerulonephritis |                                | Due to other causes |                                |
|               | 2016 (UI)         | Percent change from 2002 | 2016 (UI)                 | Percent change from 2002 | 2016 (UI)                                  | Percent change from 2002 | 2016 (UI)       | Percent change from 2002 (PA*) | 2016 (UI)           | Percent change from 2002 (PA*) | 2016 (UI)                 | Percent change from 2002 (PA*) | 2016 (UI)           | Percent change from 2002 (PA*) |
| Washington    | 634<br>(567, 706) | 113.9                    | 18<br>(16, 20)            | 78.3                     | 14<br>(12, 15)                             | 34.8                     | 7 (6, 8)        | 38.4<br>(54.4)                 | 4 (3, 5)            | 33.8<br>(29.4)                 | 1 (1, 1)                  | 28.3 (5.4)                     | 2 (1, 2)            | 27.1<br>(10.8)                 |
| West Virginia | 374<br>(335, 418) | 66.2                     | 41<br>(37, 46)            | 62                       | 28<br>(25, 31)                             | 29.6                     | 15<br>(13, 17)  | 33.1<br>(56.8)                 | 8 (6, 9)            | 28.3<br>(27)                   | 2 (1, 2)                  | 24.4 (5.7)                     | 4 (3, 5)            | 22<br>(10.5)                   |
| Wisconsin     | 779<br>(702, 861) | 60.4                     | 27<br>(24, 30)            | 50.3                     | 19<br>(17, 21)                             | 14.4                     | 10 (8, 11)      | 16.9<br>(57.4)                 | 6 (5, 7)            | 14.2<br>(30.1)                 | 1 (1, 2)                  | 10 (4.6)                       | 3 (2, 3)            | 8.3 (8)                        |
| Wyoming       | 53 (46, 61)       | 69                       | 18<br>(15, 20)            | 42.6                     | 14<br>(12, 16)                             | 8.9                      | 7 (6, 9)        | 13.9<br>(76)                   | 4 (3, 5)            | 4.4<br>(14.9)                  | 1 (1, 1)                  | 5.7 (4.3)                      | 2 (1, 2)            | 3 (4.8)                        |

UI is the uncertainty interval, it reflects the certainty of an estimate based on data availability, studies size and consistency across data sources  
\*Percentage attributed to overall rate is the proportion of overall age-standardized rate change attributed by each of the following four causes: diabetes, hypertension, glomerulonephritis and other causes

## eFigures

### eFigure Legends:

**eFigure 1: Maps of the Age-standardized disability-adjusted life years (DALYs) due to chronic kidney disease in the United States in females and males.** A) 2016 age-standardized DALY rates due to chronic kidney disease in females; B) 2016 age-standardized DALY rates due to chronic kidney disease in males; C) Percentage change in age-standardized DALY rates due to chronic kidney disease from 2002 to 2016 in females; D) Percentage change in age-standardized DALY rates due to chronic kidney disease from 2002 to 2016 in males. Rates are per 100,000 persons. Percentage change maps are colored by deciles of their respective values.

**eFigure 2: Maps of the Age-standardized death due to chronic kidney disease in the United States in females and males.** A) 2016 death rates due to chronic kidney disease in females; B) 2016 death rates due to chronic kidney disease in males; C) Percentage change in death rates due to chronic kidney disease from 2002 to 2016 in females; D) Percentage change in death rates due to chronic kidney disease from 2002 to 2016 in males. Rates are per 100,000 persons. Percentage change maps are colored by deciles of their respective values.

**eFigure 3: Decomposition of the percentage change in chronic kidney disease burden in the United States from 2002 to 2016 due to changes in age structure, size of the population, and risk exposure.** A) Disability-adjusted life years (DALYs); B) Death. Geographies are ordered by total percent change.

**eFigure 4: Decomposition of the percentage change in age-standardized death rates due to chronic kidney disease in the United States from 2002 to 2016 by risk factor.** Geographies are ordered by total percentage change. Risk exposures are colored similarly to others that fall in the same risk exposure category (environmental risk factors, metabolic risk factors, and dietary risk factors). SSB, sugar sweetened beverages.

**eFigure 5: Decomposition of the percentage change in age-standardized CKD burden rate in the United States from 2002 to 2016 by cause.** A) Disability-adjusted life years (DALYs); B) Death. Geographies are ordered by total percent change.

**eFigure 6: Age-standardized disability-adjusted life year (DALY) rates due to chronic kidney disease in 2002 vs. 2016 by socio-demographic index (SDI).** SDI is a summary measure of a geographies income, education, and fertility rate. Values range from 0 to 1, where a higher value indicates higher socio-demographic development.

**eFigure 7: Observed to expected ratio of age-standardized disability-adjusted life year (DALY) rate due to CKD in 2016 based on a state or district's socio-demographic index (SDI).** SDI is a summary measure of a geographies income, education, and fertility rate. Values range from 0 to 1, where a higher value indicates higher socio-demographic development.

**eFigure 8: Frontier analysis for age-standardized disability-adjusted life year (DALY) rates due to CKD by socio-demographic index (SDI) in 2016.** The Y axis is inverted (lower DALY rates are at the top). SDI is a summary measure of a geographies income, education, and fertility rate. Values range from 0 to 1, where a higher value indicates higher socio-demographic development. Distance from the frontier indicates the effective difference; all DALY rates less than the frontier are considered to have a zero effective difference.

**eFigure 1A:** 2016 age-standardized DALY rates due to chronic kidney disease in females

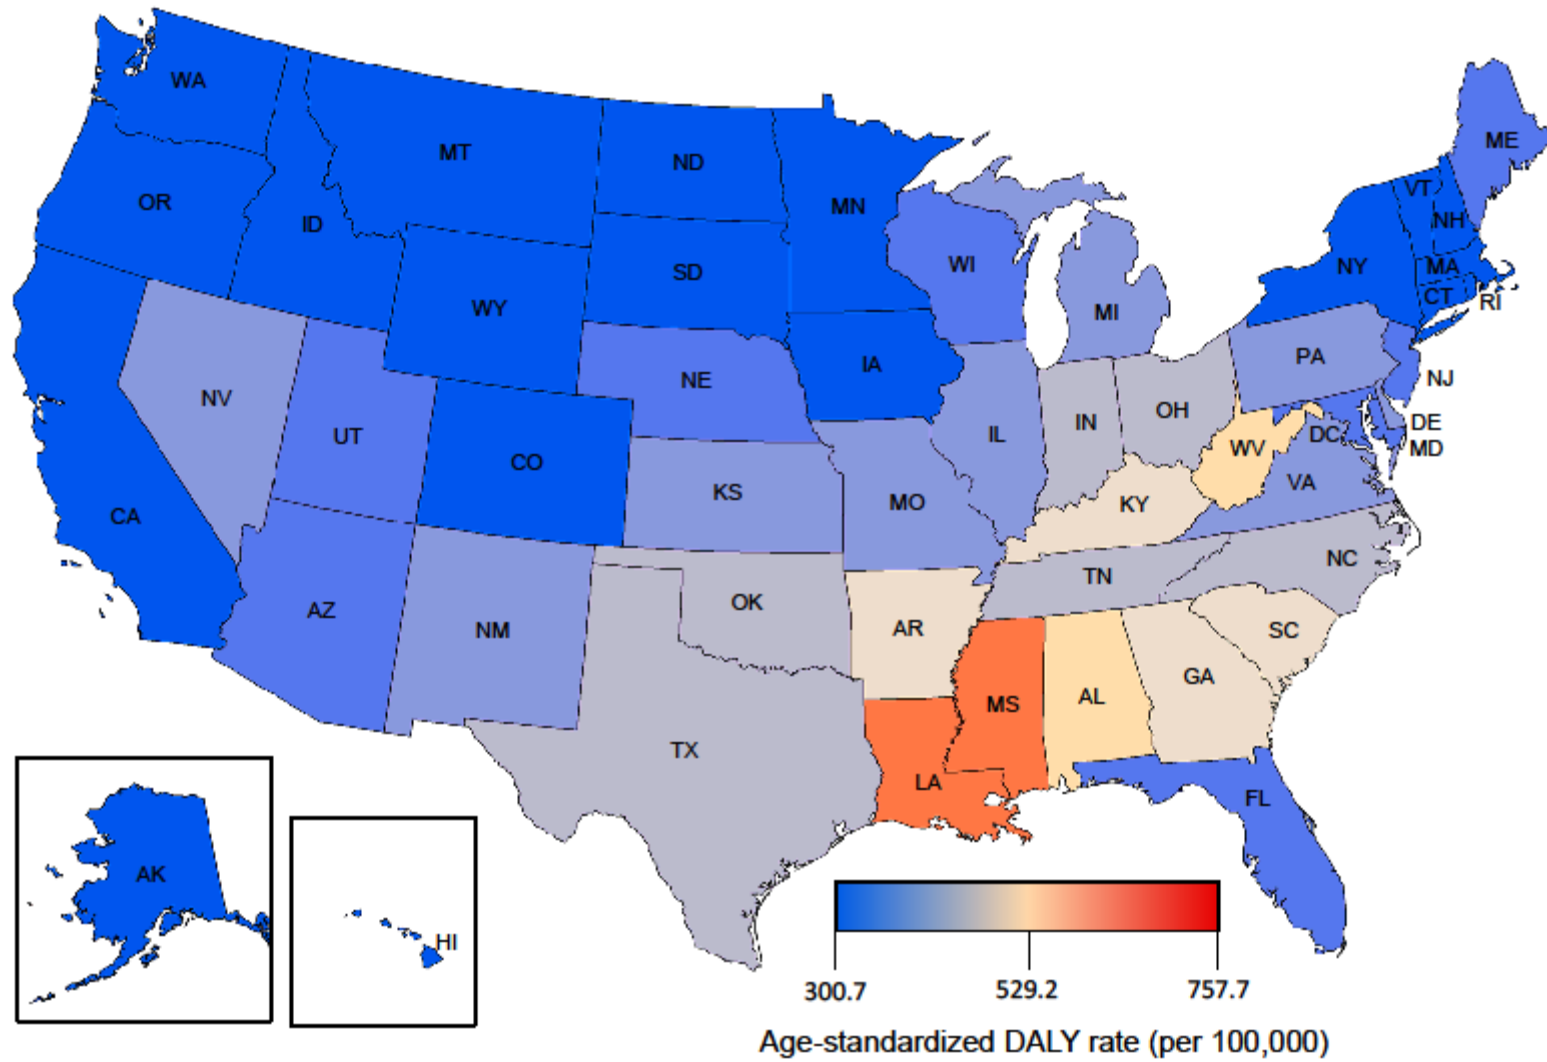

**eFigure 1B:** 2016 age-standardized DALY rates due to chronic kidney disease in males

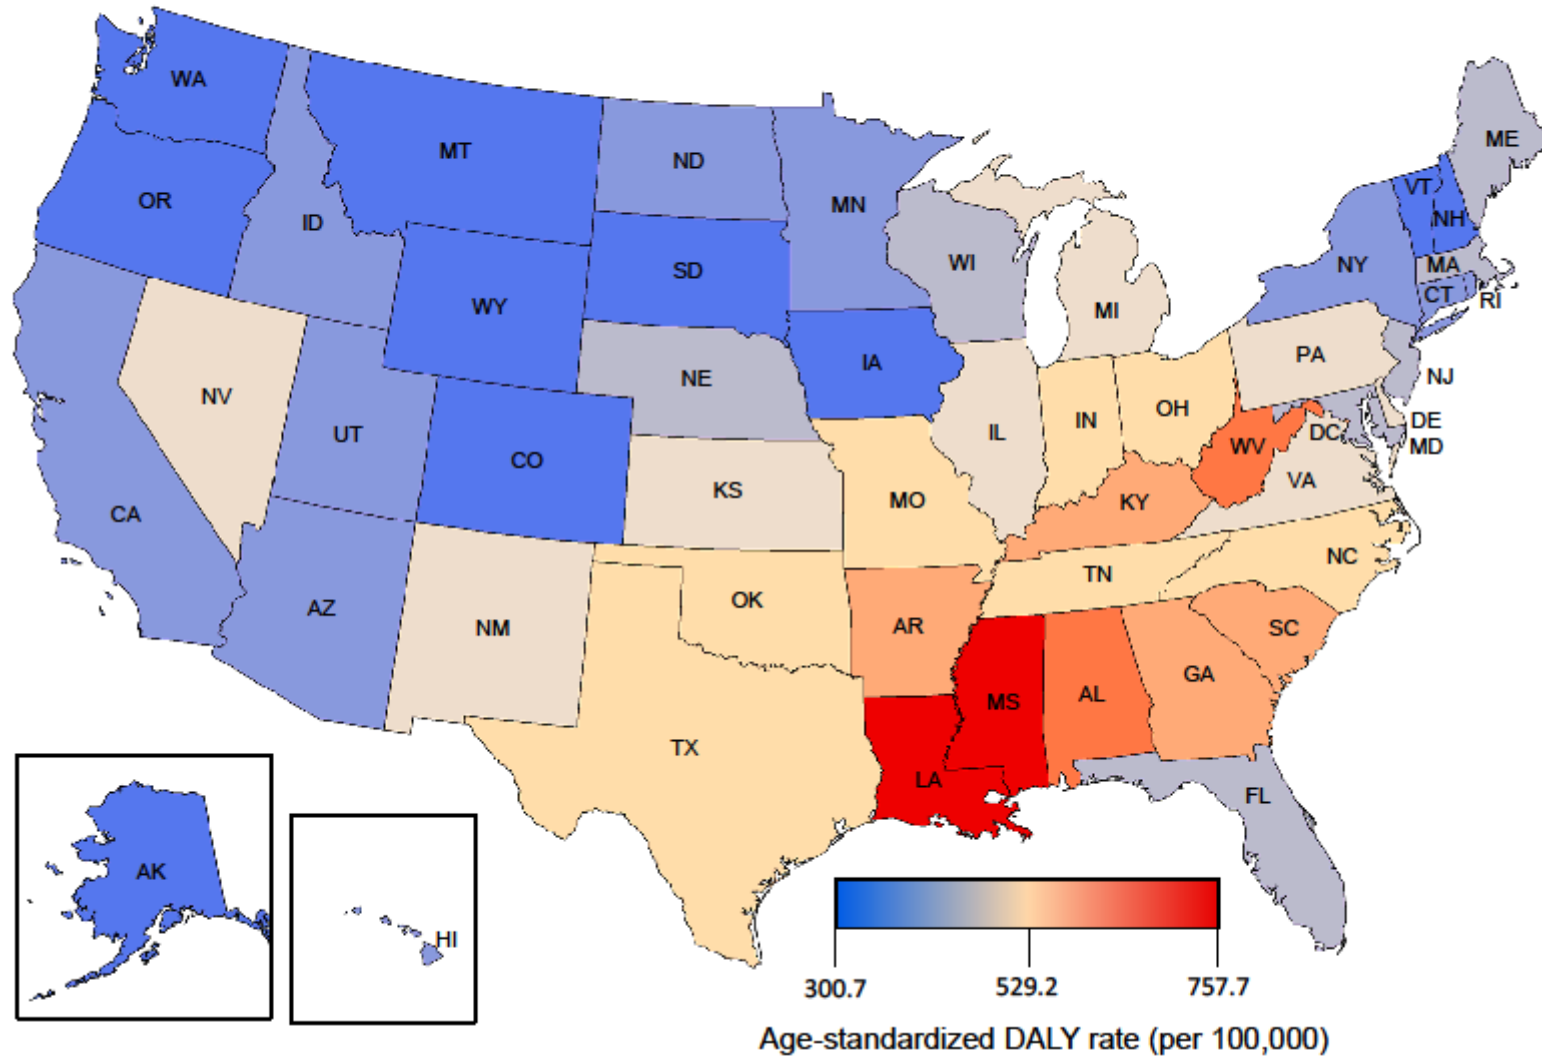

**eFigure 1C:** Percentage change in age-standardized DALY rates due to chronic kidney disease from 2002 to 2016 in females

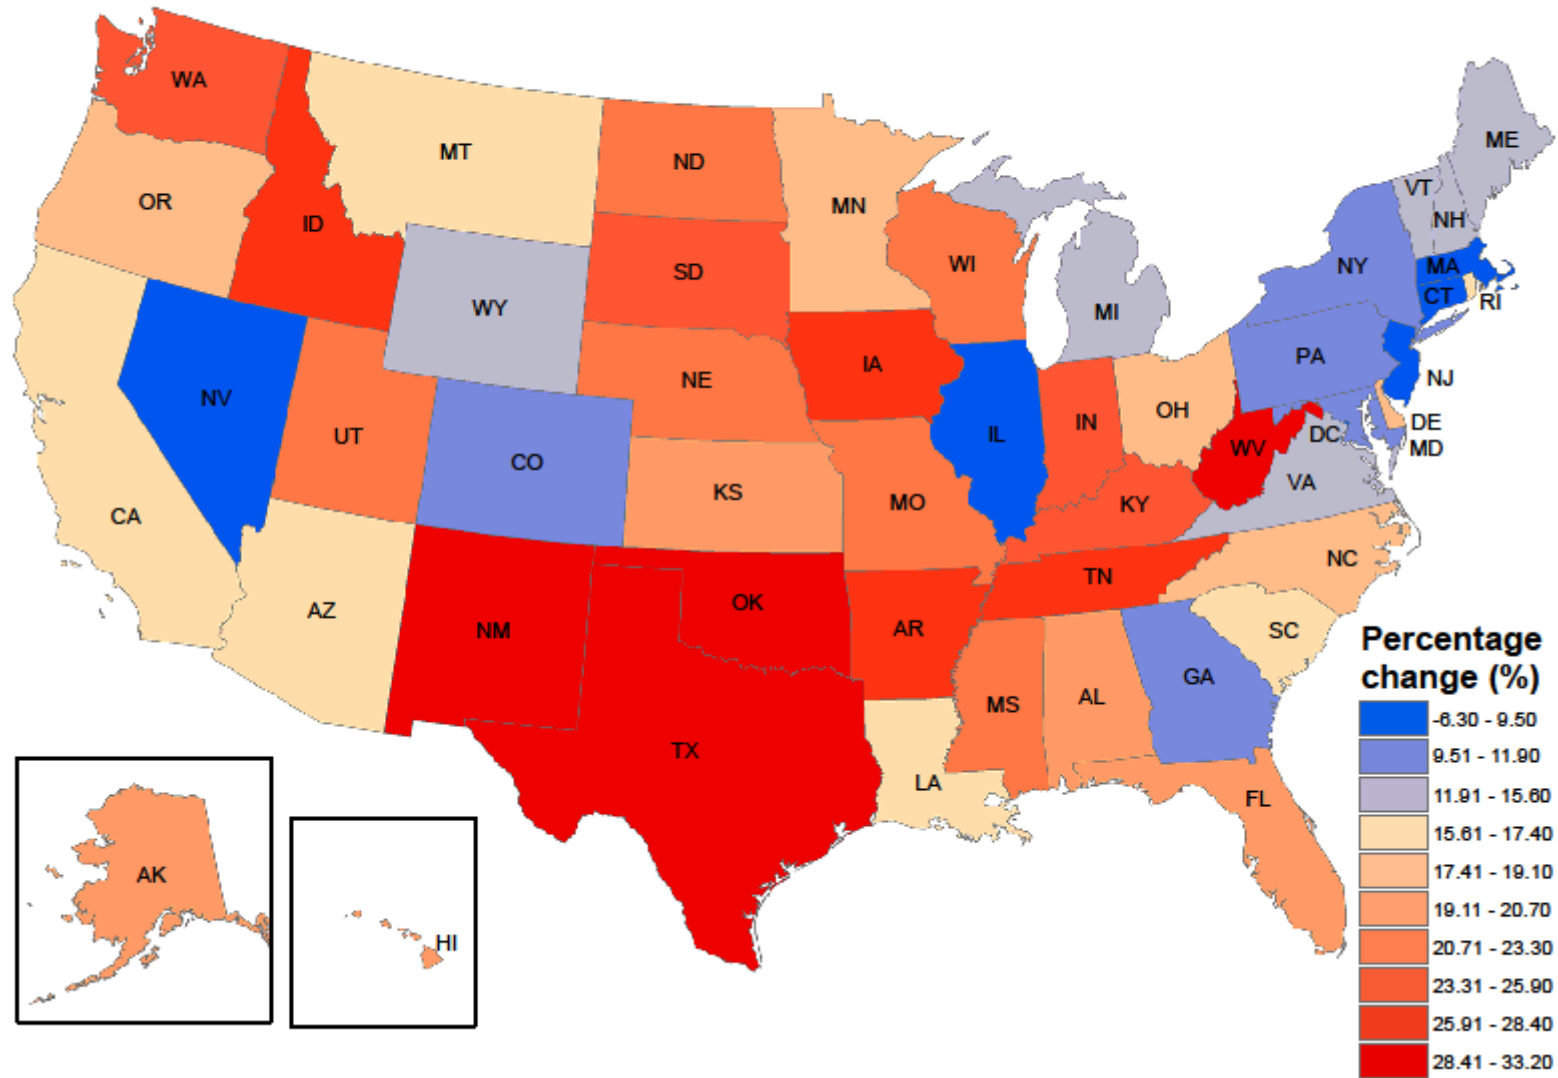

**eFigure 1D:** Percentage change in age-standardized DALY rates due to chronic kidney disease from 2002 to 2016 in males

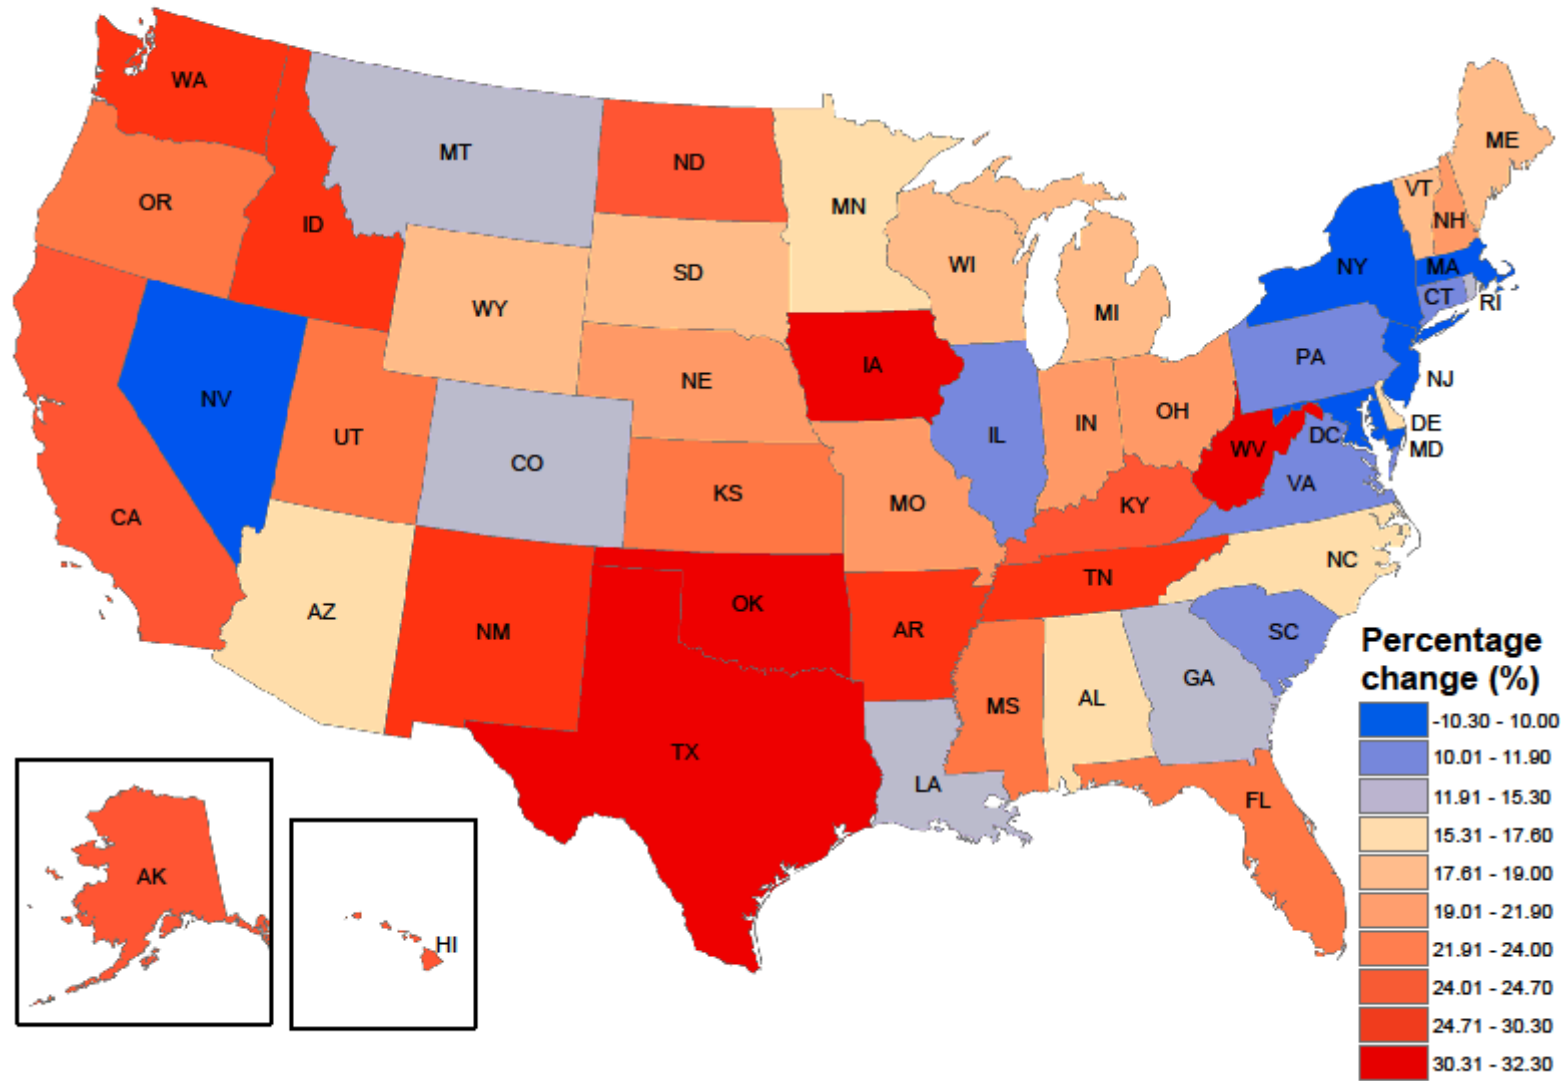





**eFigure 2B:** 2016 age-standardized death rates due to chronic kidney disease in males

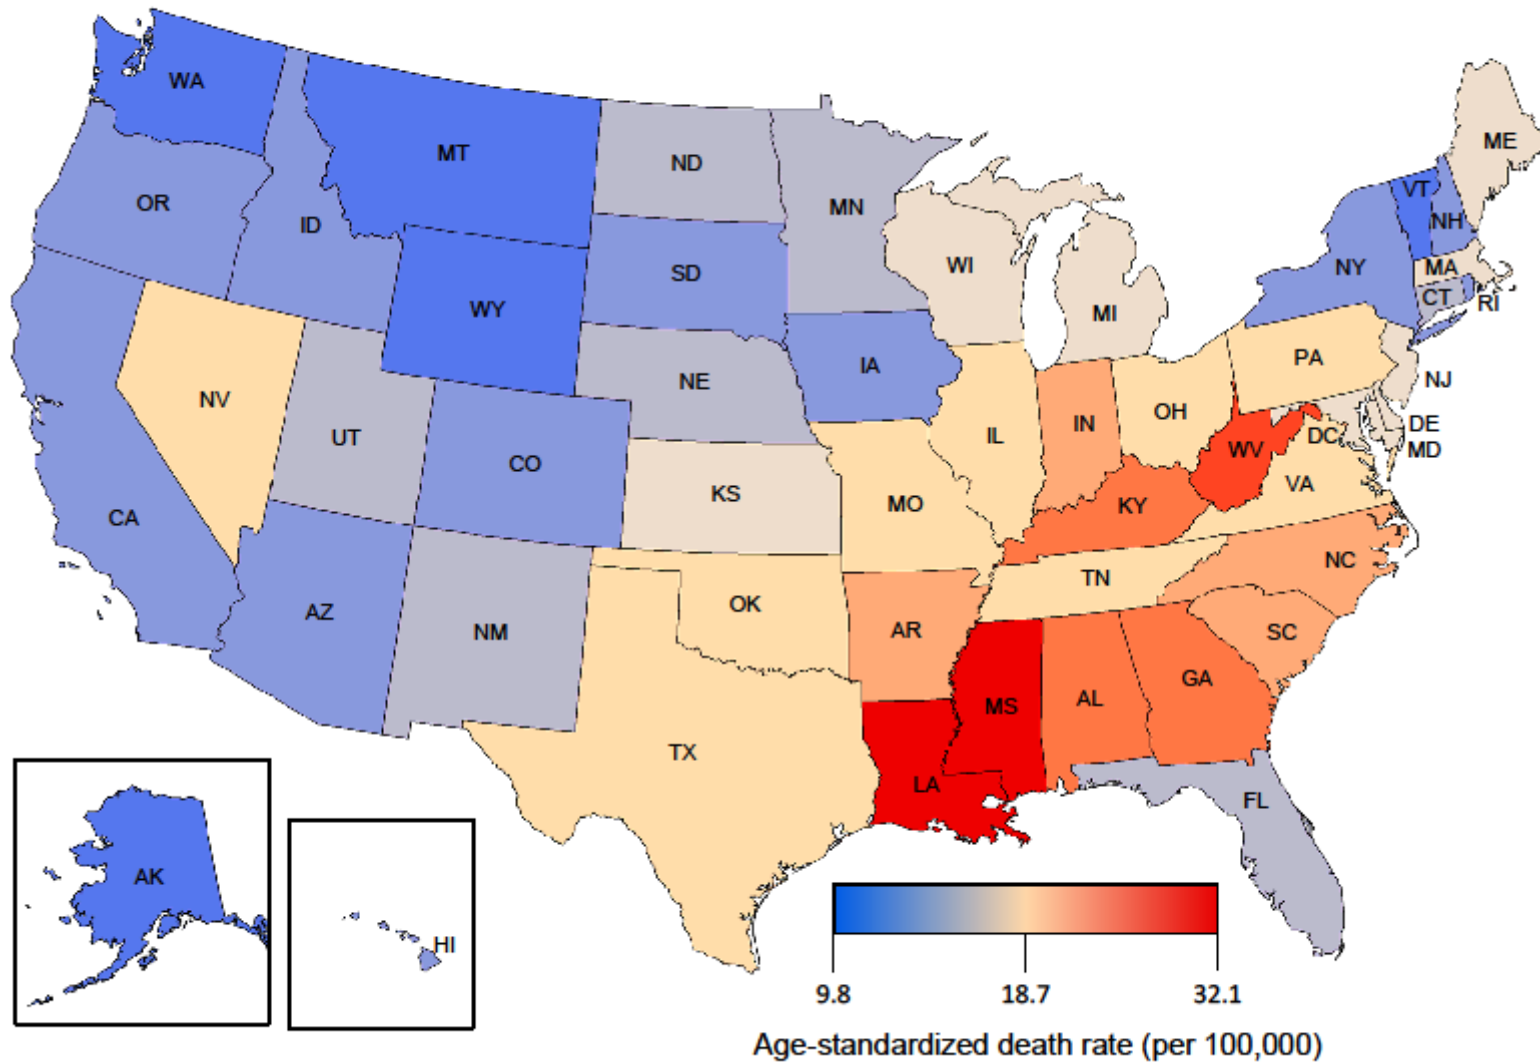

**eFigure 2C:** Percentage change in age-standardized death rates due to chronic kidney disease from 2002 to 2016 in females

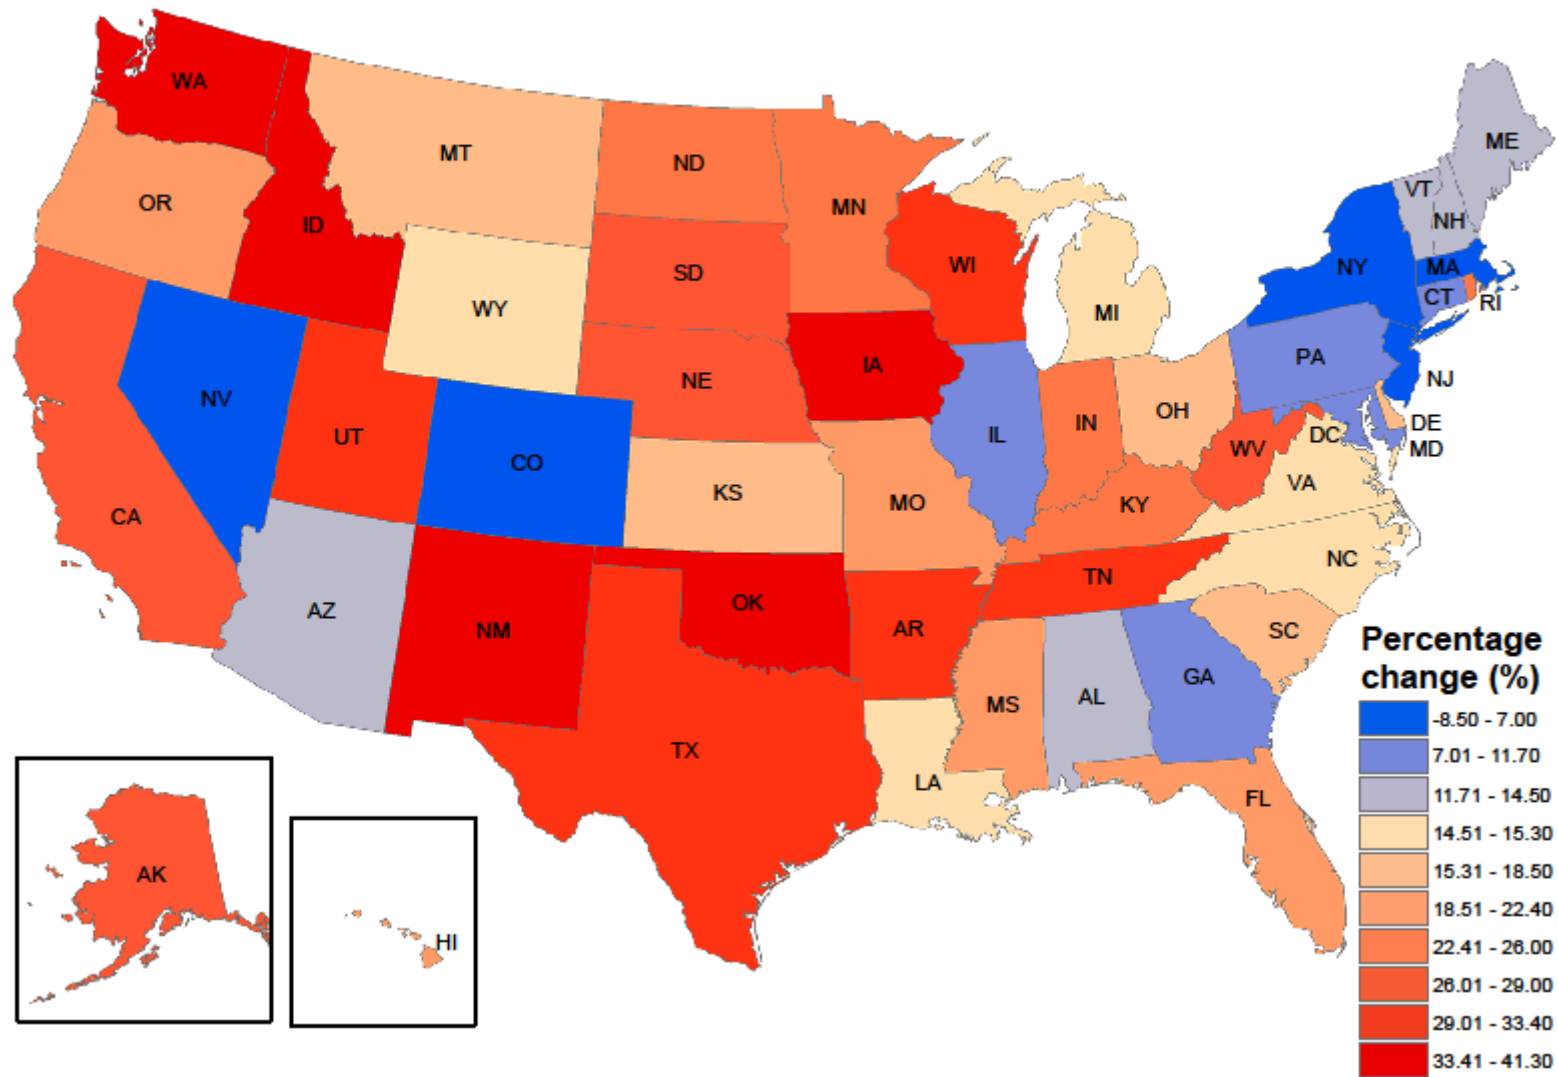

**eFigure 2D:** Percentage change in age-standardized death rates due to chronic kidney disease from 2002 to 2016 in males

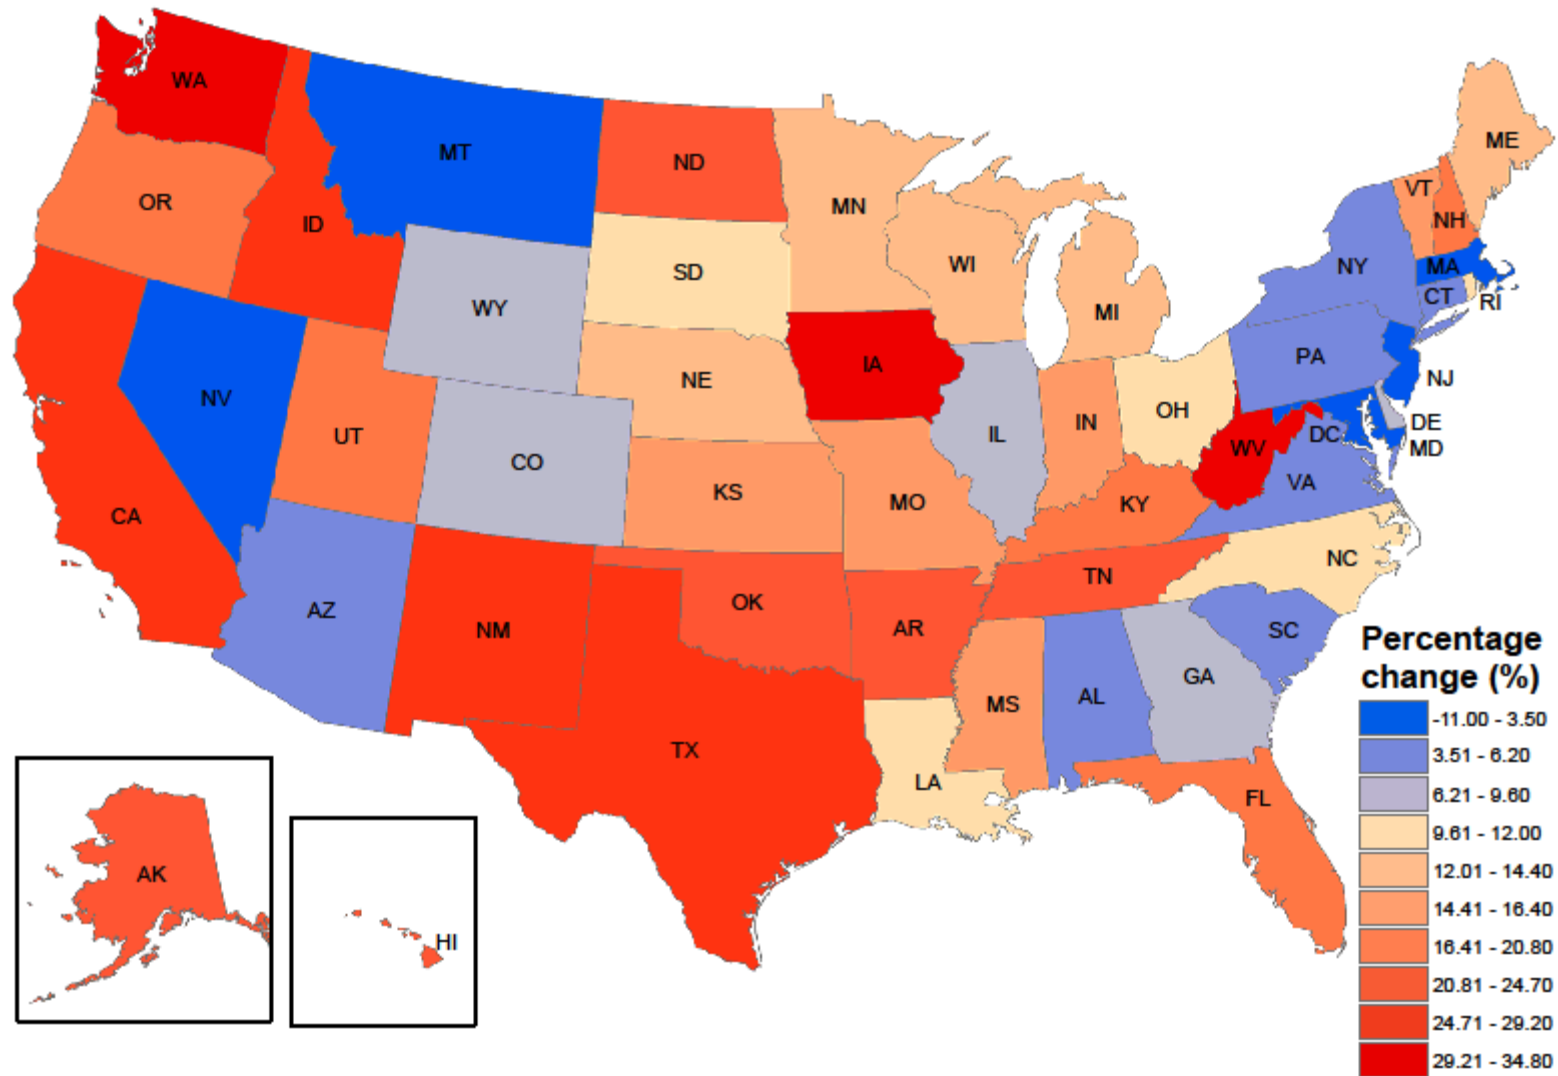

**eFigure 3A:** Decomposition of change in DALYs from 2002 to 2016 due to chronic kidney disease by age structure, size of the population, and risk exposure.

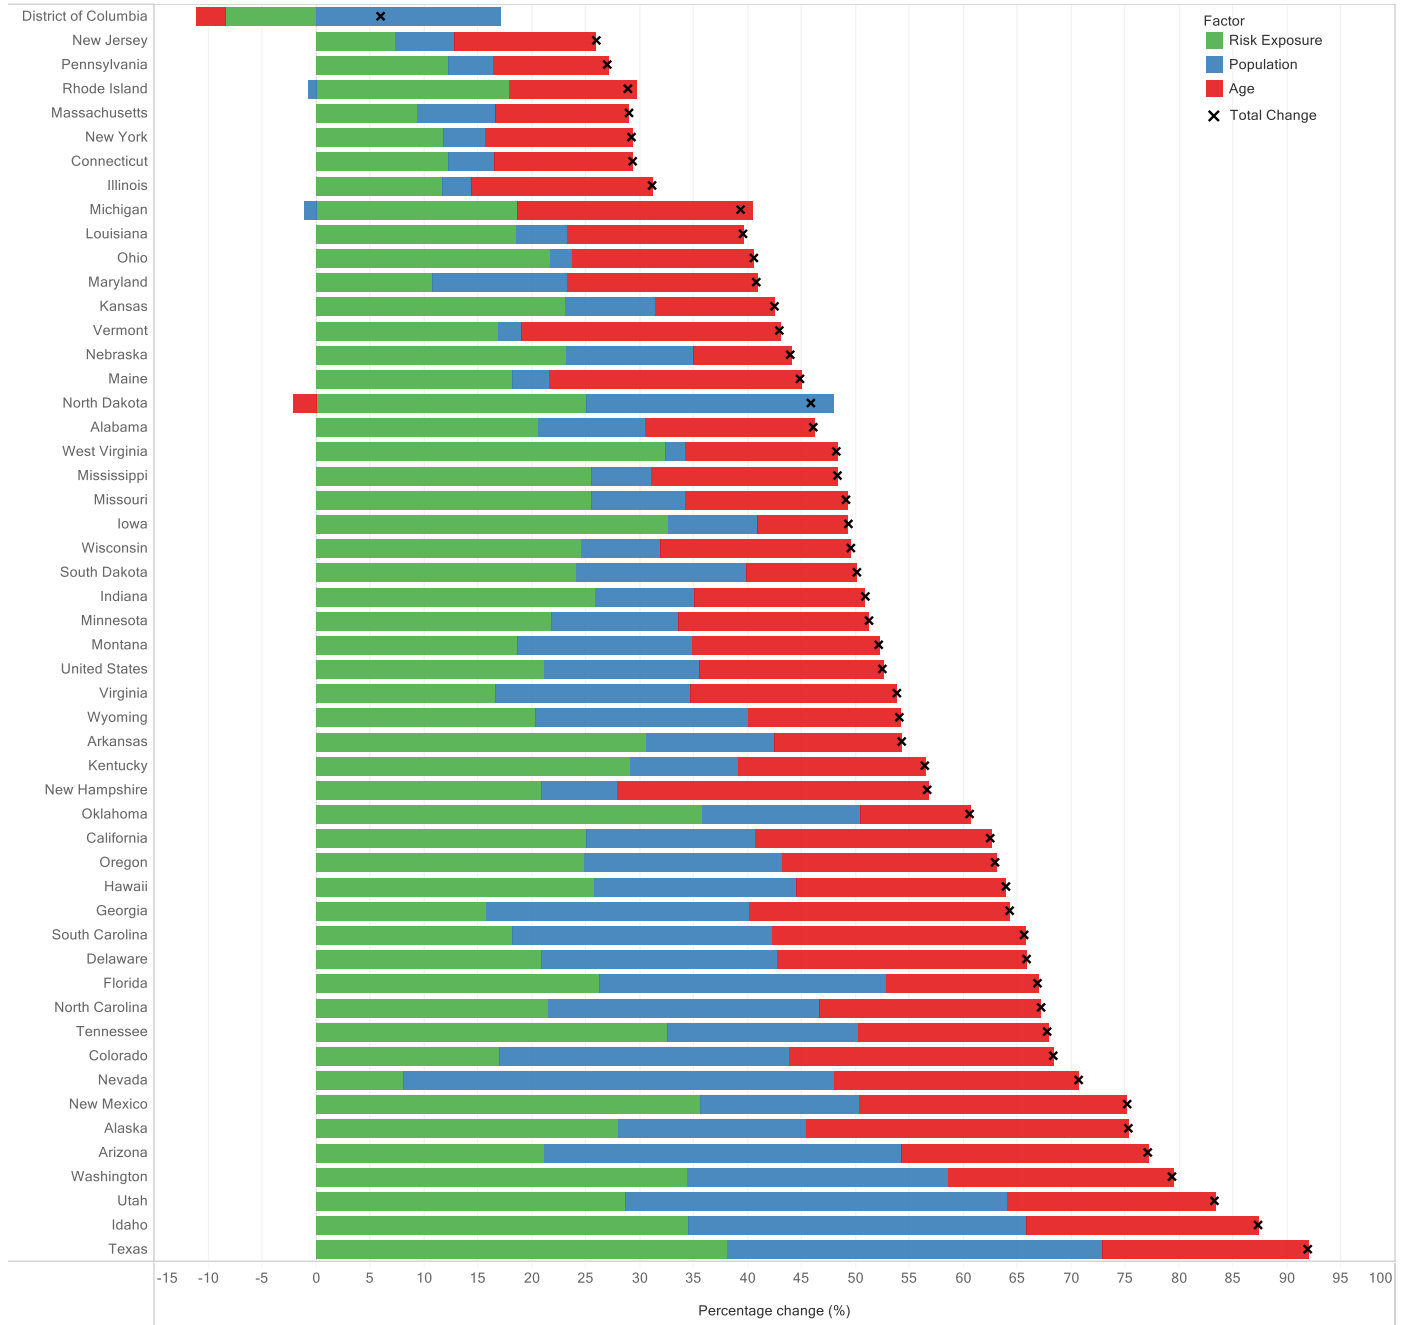

**eFigure 3B:** Decomposition of the percentage change in deaths from 2002 to 2016 due to chronic kidney disease by age structure, size of the population, and risk exposure.

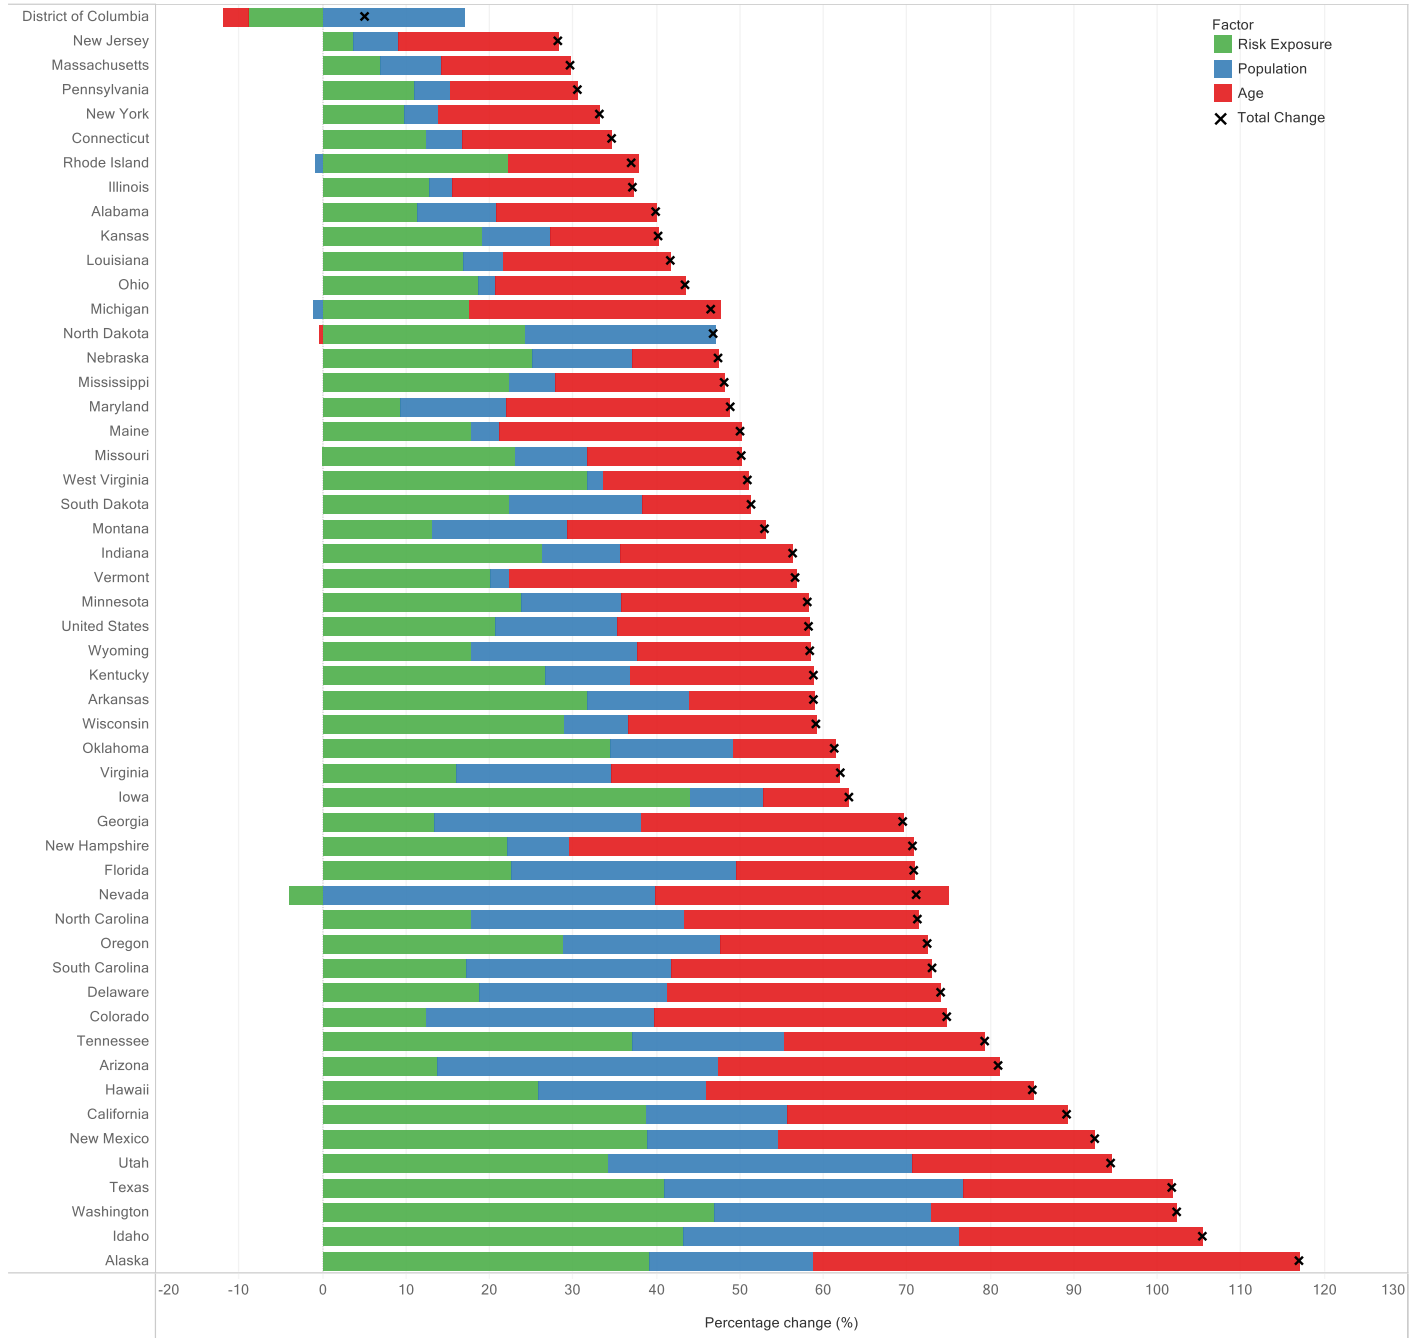

**eFigure 4:** Decomposition of the percentage change in deaths from 2002 to 2016 due to chronic kidney disease by risk factor.

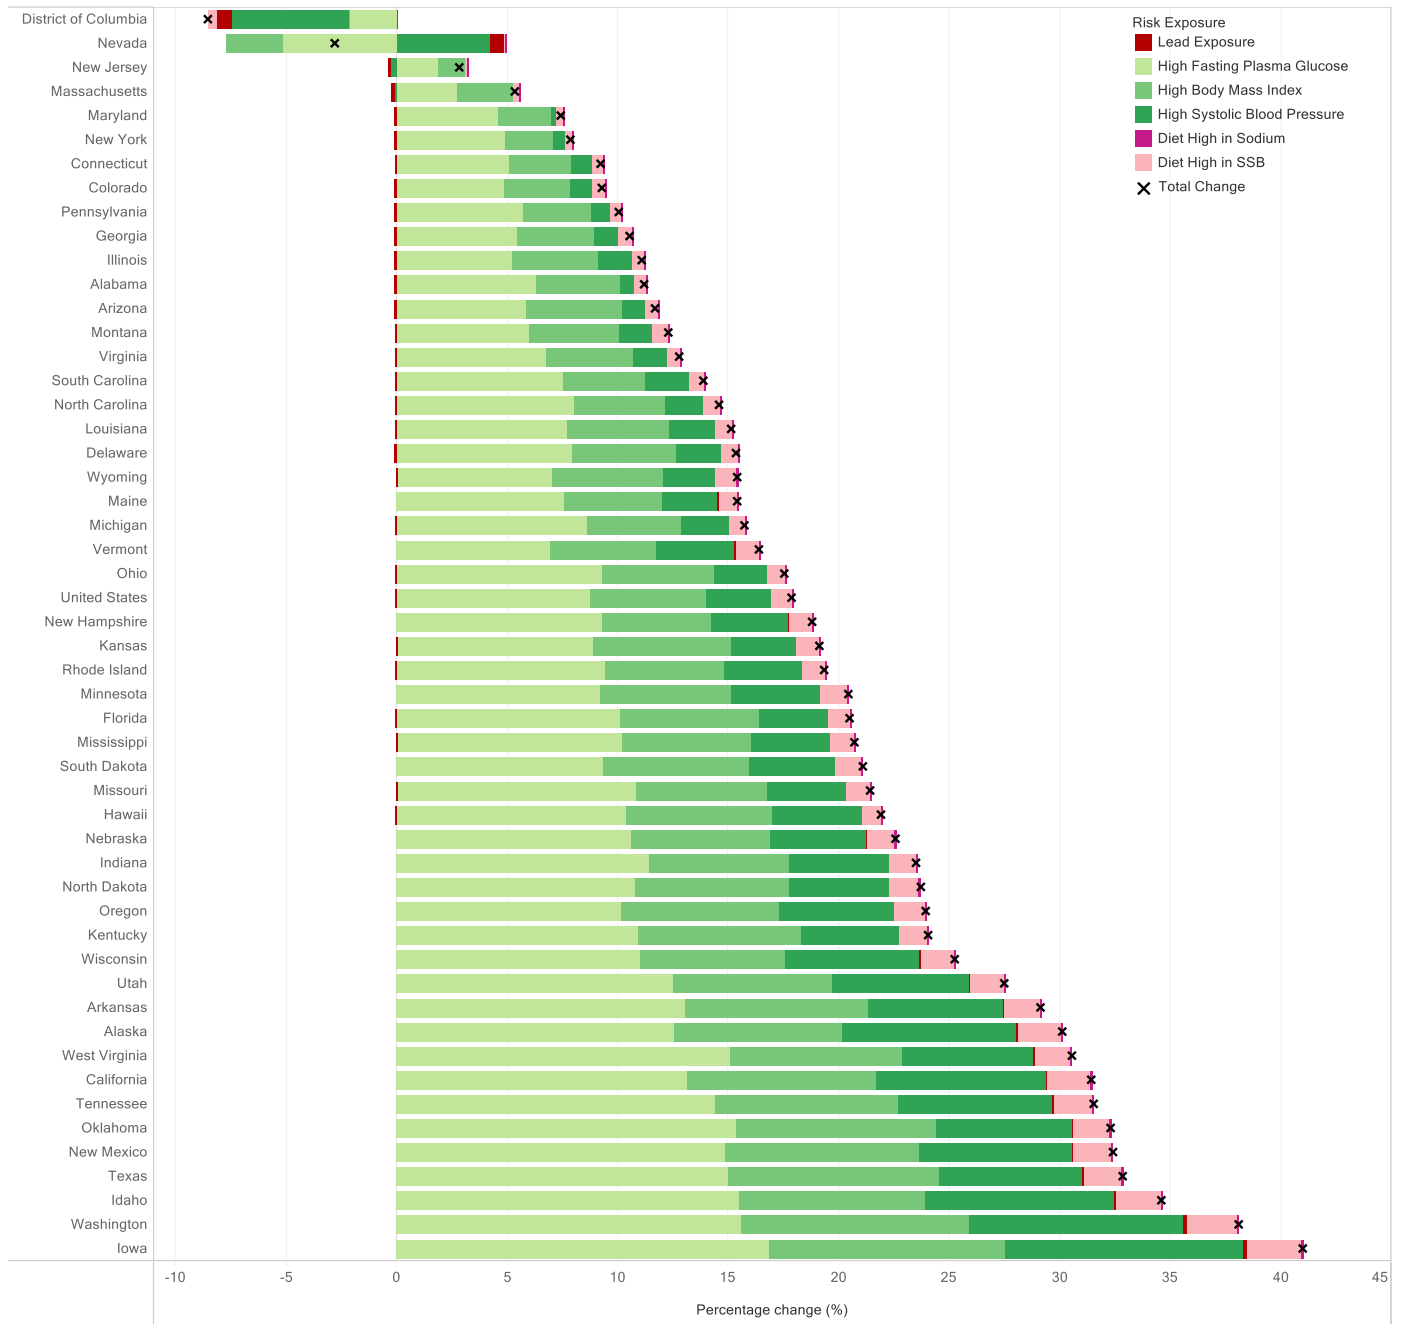

**eFigure 5A:** Decomposition of the percentage change in age-standardized DALY rates in the United States from 2002 to 2016 by cause.

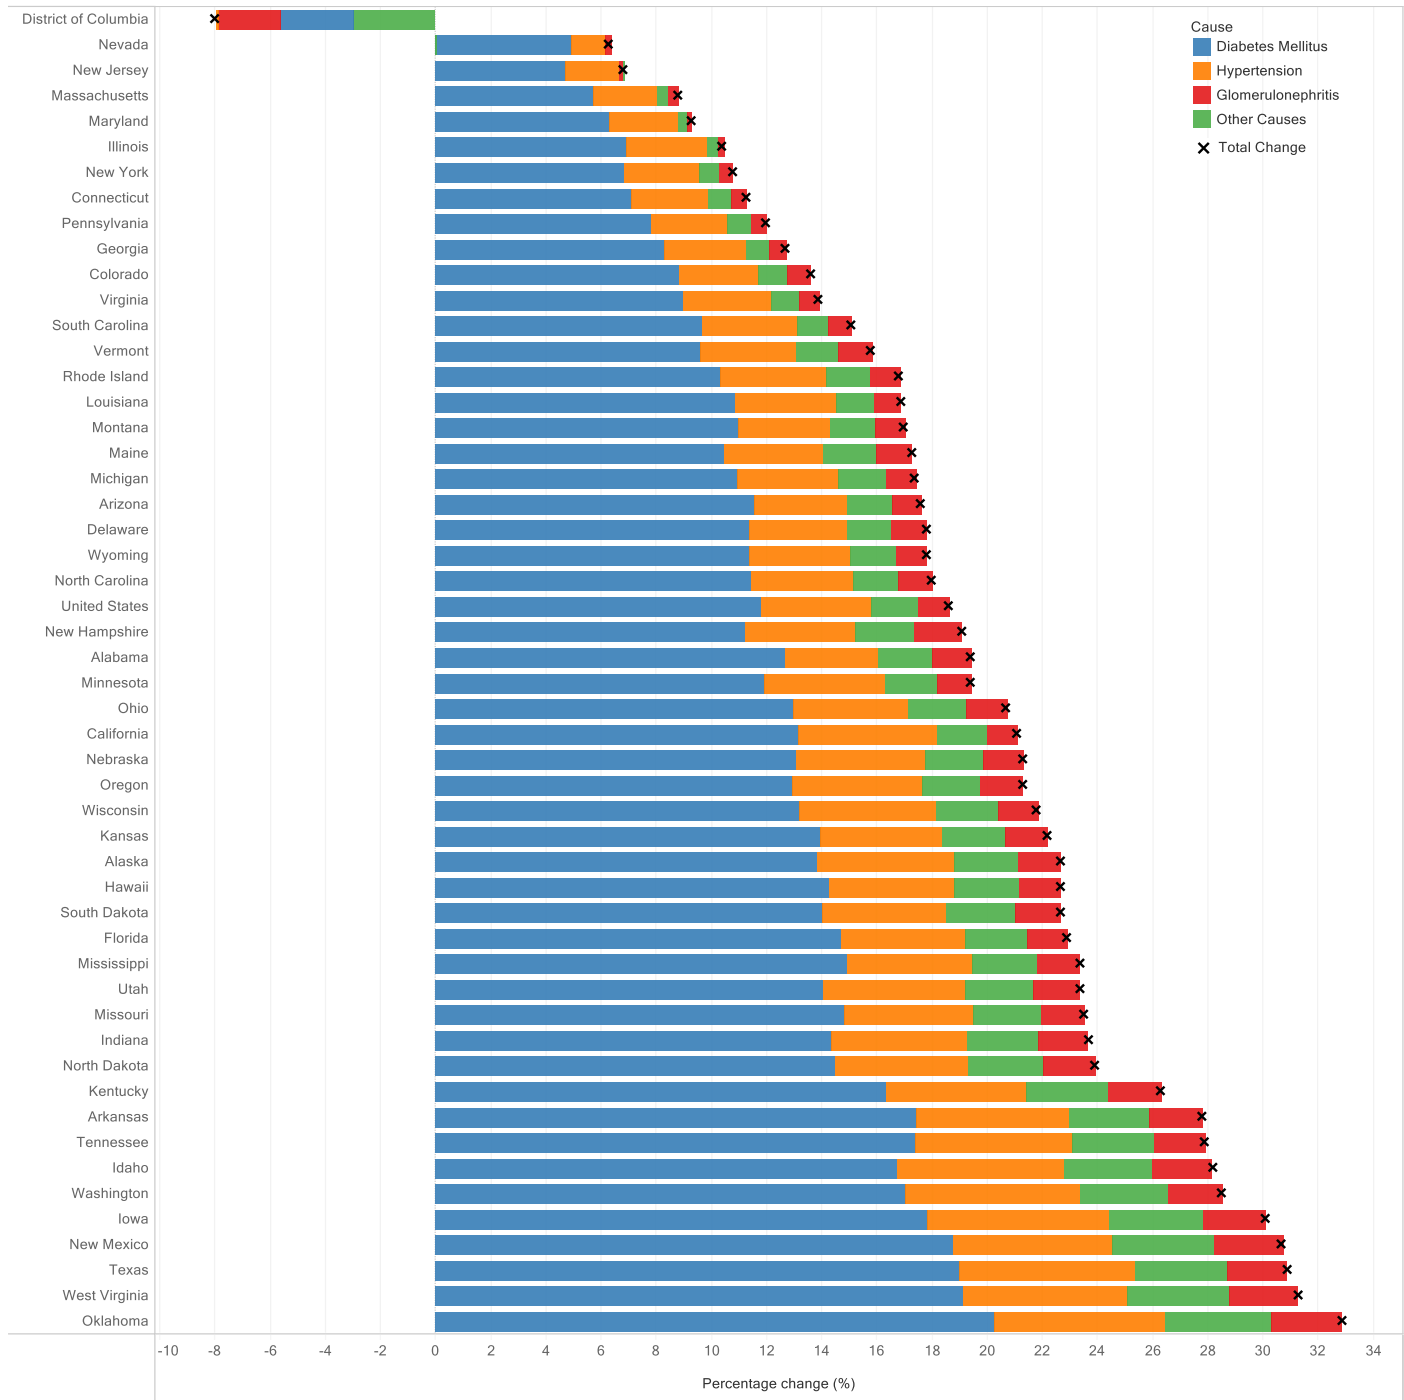

**eFigure 5B:** Decomposition of the percentage change in age-standardized death rates in the United States from 2002 to 2016 by cause.

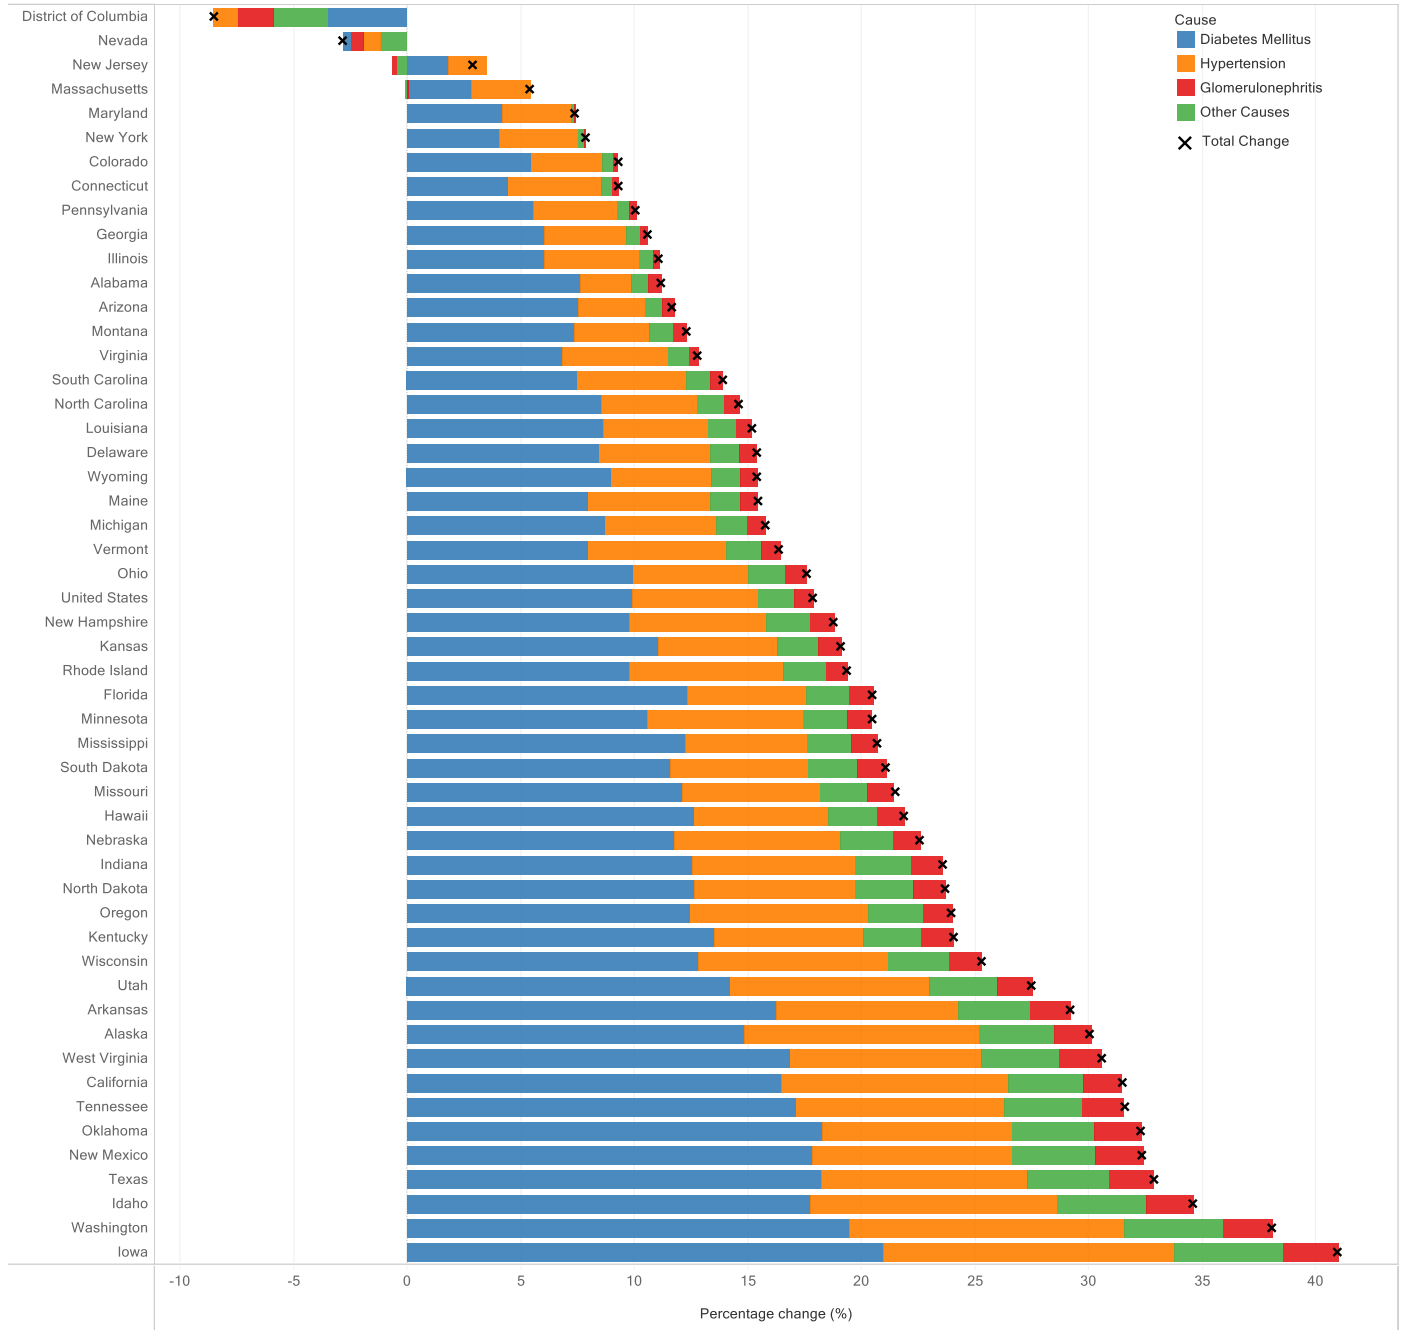



**eFigure 6:** Age-standardized disability-adjusted life year (DALY) rates due to CKD by socio-demographic index (SDI) in 2002 and 2016 for all states and one district.

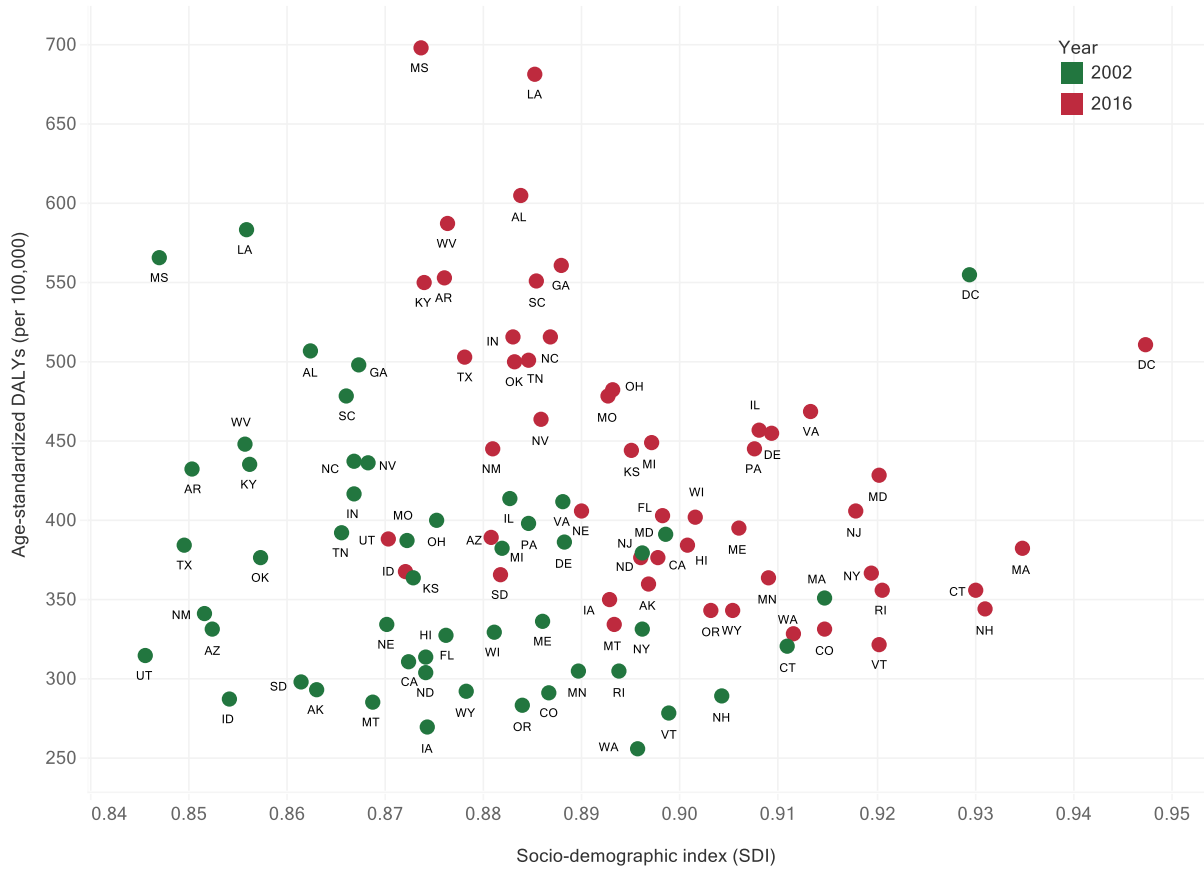

**eFigure7:** Observed to expected ratio of age-standardized disability-adjusted life year (DALY) rates due to CKD in 2016 based on a state or district's socio-demographic index (SDI).

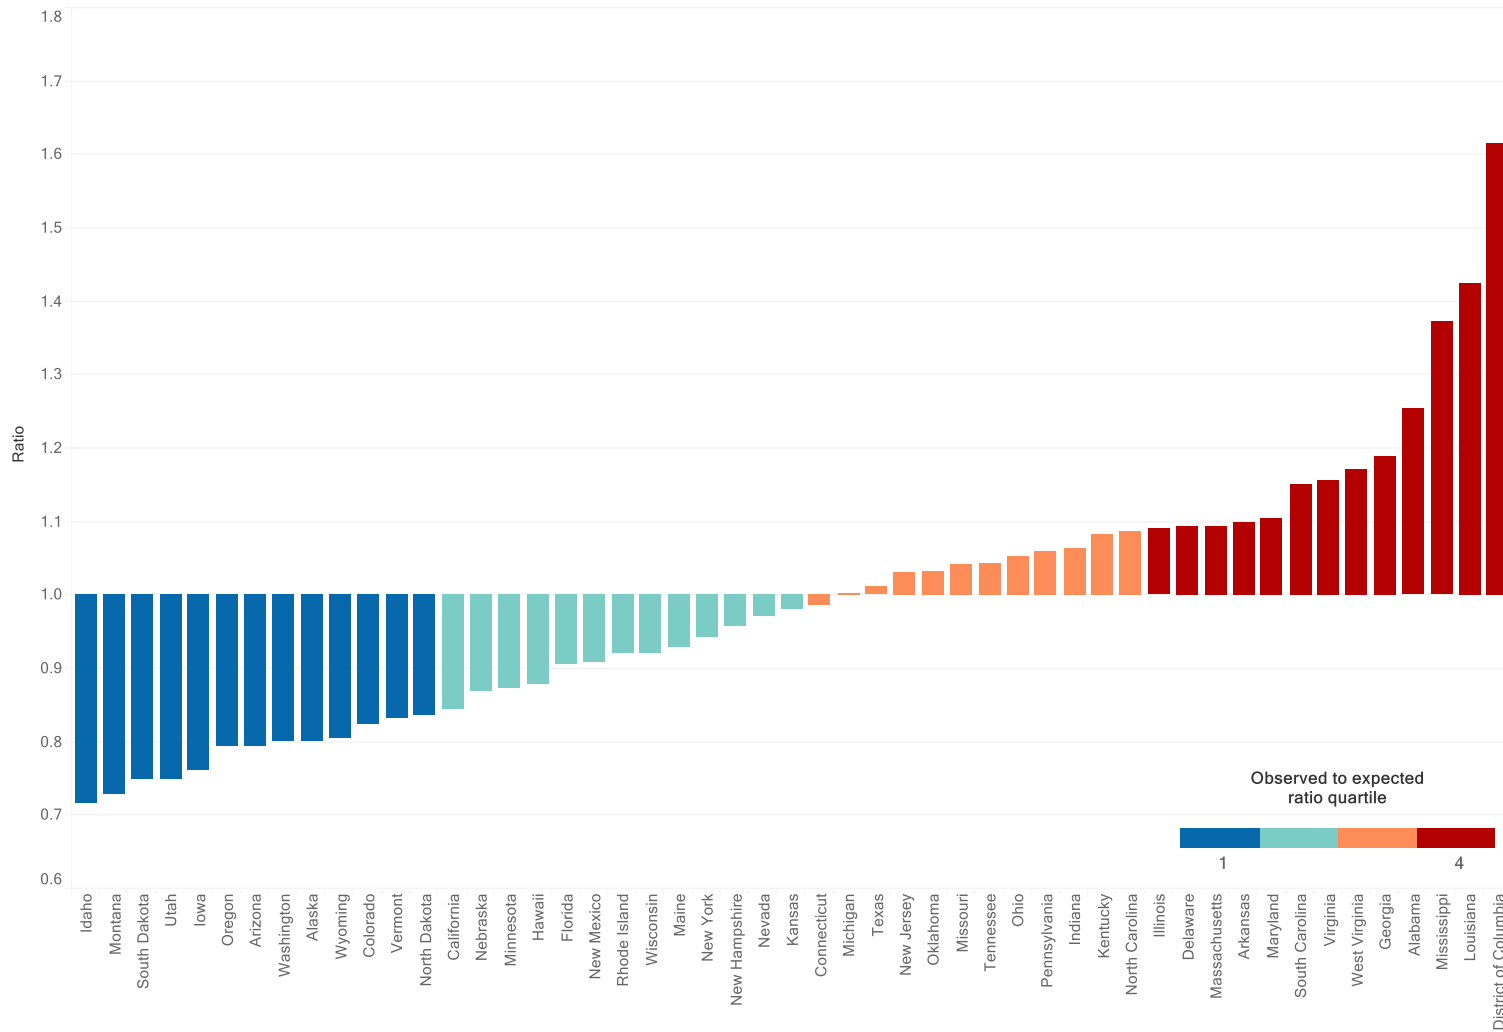

**eFigure 8:** Frontier analysis for age-standardized disability-adjusted life year (DALY) rates due to CKD by socio-demographic index (SDI) in 2016.

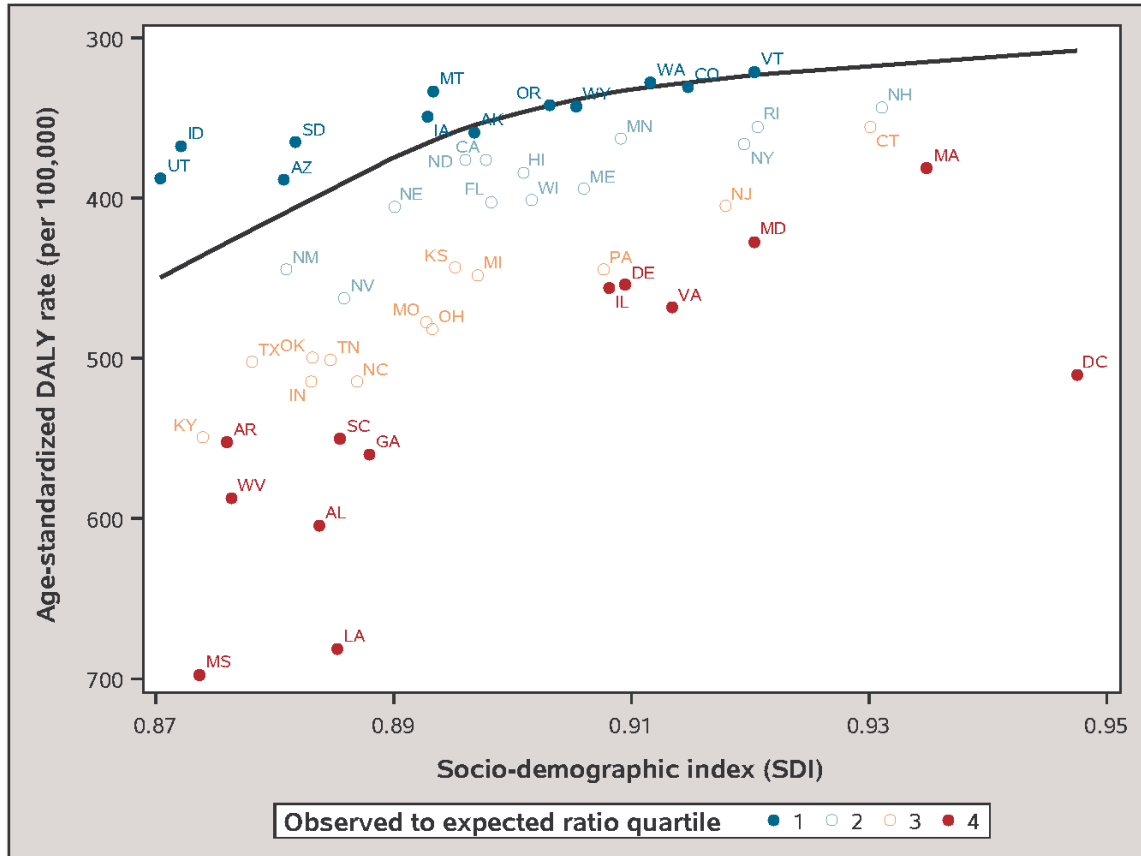

Supplement: jamanetwopen-1-e184412-s001.pdf [file jamanetwopen-1-e184412-s001.pdf]
